1  
2           **Structure of the RZZ complex and molecular basis of Spindly-driven**  
3           **corona assembly at human kinetochores**  
4

5  
6           Tobias Raisch<sup>1,†</sup>, Giuseppe Ciossani<sup>2,&†</sup>, Ennio d'Amico<sup>2,†</sup>, Verena Cmentowski<sup>2,†</sup>, Sara  
7 Carmignani<sup>2</sup>, Stefano Maffini<sup>2</sup>, Felipe Merino<sup>1,^</sup>, Sabine Wohlgemuth<sup>2</sup>, Ingrid R. Vetter<sup>2,@</sup>, Stefan  
8 Raunser<sup>1,@</sup> & Andrea Musacchio<sup>2,3,@</sup>  
9

10  
11  
12           Department of Structural Biochemistry, Max Planck Institute of Molecular Physiology, Otto-  
13           Hahn Straße 11, 44227 Dortmund, Germany

14           Department of Mechanistic Cell Biology, Max Planck Institute of Molecular Physiology, Otto-  
15           Hahn Straße 11, 44227 Dortmund, Germany

16           Centre for Medical Biotechnology, Faculty of Biology, University Duisburg-Essen, Essen,  
17           Germany

18  
19           \***Corresponding authors:** andrea.musacchio@mpi-dortmund.mpg.de; stefan.raunser@mpi-  
20           dortmund.mpg.de; ingrid.vetter@mpi-dortmund.mpg.de

21  
22           †These authors contributed equally

23  
24           &**Present address:** European Institute of Oncology, Via Adamello 16, 20100 Milan, Italy

25  
26           ^**Present address:** Max Planck Institute for Developmental Biology, Department of Protein  
27           Evolution, Max-Planck-Ring 5, 72076 Tübingen, Germany

28  
29           **Keywords:** kinetochore; centromere; cell division; mitosis; chromosome segregation; RZZ;  
30           ROD; Rough deal; Zwilch; ZW10; Zeste-white 10; Spindly; spindle assembly checkpoint; fibrous  
31           corona; clathrin; CENP-E; polymer; coatomer; COPI; COPII; single particle electron  
32           microscopy

33  
34           **Short title:** Structure of the RZZ complex  
35

36 In metazoans, a  $\approx 1$  megadalton (MDa) super-complex comprising the Dynein-Dynactin  
37 adaptor Spindly and the ROD-Zwilch-ZW10 (RZZ) complex is the building block of a  
38 fibrous biopolymer, the kinetochore fibrous corona. The corona assembles on mitotic  
39 kinetochores to promote microtubule capture and spindle assembly checkpoint (SAC)  
40 signaling. We report here a high-resolution cryo-EM structure that captures the essential  
41 features of the RZZ complex, including a farnesyl binding site required for Spindly  
42 binding. Using a highly predictive *in vitro* assay, we demonstrate that the SAC kinase  
43 MPS1 is necessary and sufficient for corona assembly at supercritical concentrations of the  
44 RZZ-Spindly (RZZS) complex, and describe the molecular mechanism of  
45 phosphorylation-dependent filament nucleation. We identify several structural  
46 requirements for RZZS polymerization in rings and sheets. Finally, we identify  
47 determinants of kinetochore localization and corona assembly of Spindly. Our results  
48 describe a framework for the long-sought-for molecular basis of corona assembly on  
49 metazoan kinetochores.

50

## 51 Introduction

52 Kinetochores are multi-subunit macromolecular assemblies that promote the bi-orientation and  
53 segregation of chromosomes during cell division (Musacchio and Desai, 2017; Navarro and  
54 Cheeseman, 2021). They are multi-layered structures built on specialized chromatin loci named  
55 centromeres. The kinetochore's inner layer, named the constitutive centromere-associated  
56 network (CCAN) binds directly to the centromeric chromatin. The kinetochore's outer layer,  
57 named the Knl1 complex, Mis12 complex, Ndc80 complex (KMN) network, generates a  
58 microtubule-binding interface. Additionally, the KMN network is a functional platform for the  
59 recruitment of several proteins that regulate the process of chromosome bi-orientation. Among  
60 the latter are proteins participating in the spindle assembly checkpoint (SAC), a cell cycle  
61 checkpoint that prevents mitotic exit before completion of bi-orientation (Lara-Gonzalez et al.,  
62 2021). SAC coordination is essential to prevent premature exit from mitosis or meiosis, which, by  
63 causing loss of chromosome cohesion in presence of unattached chromosomes, prevents  
64 successful chromosome partition to the daughter cells and is therefore essential for genome  
65 stability (Lara-Gonzalez et al., 2021).

66 In metazoans, including humans, checkpoint activity is coupled with the assembly of an outermost  
67 kinetochore layer named the kinetochore corona (Cooke et al., 1997; Hoffman et al., 2001;  
68 Jokelainen, 1967; Magidson et al., 2015; McEwen et al., 1993; Rieder and Alexander, 1990; Yao et

69 al., 1997). The corona is a fibrous crescent-shaped structure that is only formed transiently in  
70 prometaphase cells, before the achievement of end-on attachment of chromosomes to  
71 microtubules (Kops and Gassmann, 2020). In checkpoint arrested cells, for instance in cells treated  
72 with agents, such as nocodazole, that promote microtubule depolymerization, the corona assumes  
73 a very characteristic expanded crescent shape that surrounds the core kinetochore and often even  
74 fuses with the corona nucleated by the sister kinetochore (Hoffman et al., 2001; Magidson et al.,  
75 2015; Pereira et al., 2018; Sacristan et al., 2018; Wynne and Funabiki, 2015).

76 In recent years, there has been substantial progress on the investigation of the mechanisms of  
77 assembly and disassembly of the kinetochore corona, and of its contributions to microtubule  
78 binding and SAC regulation (Kops and Gassmann, 2020). Proteins whose recruitment to  
79 kinetochore has been associated with assembly of the corona include the 3-subunit ROD-Zwilch-  
80 ZW10 complex (named after the *Drosophila melanogaster* genes *Rough Deal*, *Zwilch*, and *Zeste White*  
81 *10*, and abbreviated as RZZ), the microtubule plus-end directed motor CENP-E, the microtubule-  
82 binding protein CENP-F, a tight “core complex” of the SAC proteins MAD1 and MAD2, and the  
83 microtubule minus-end directed motor Dynein, in complex with its processivity factor Dynactin  
84 (Dynein-Dynactin will be abbreviated as DD) and with a DD adaptor named Spindly (Karess,  
85 2005; Kops and Gassmann, 2020).

86 Microtubule motors in the corona facilitate the process of chromosome alignment at the  
87 metaphase plate. After initial microtubule capture, these motors coordinate minus- and plus-end-  
88 directed transport of chromosomes that promotes their alignment at the metaphase plate before  
89 conversion of kinetochore attachment from lateral (i.e. to the microtubule lattice) to end-on (i.e.  
90 into the kinetochore interface). This conversion engages the core microtubule receptor of the  
91 kinetochore, the NDC80 complex, a sub-complex of the KMN network. A crucial aspect of the  
92 lateral to end-on conversion is that it coincides with a sudden activation of DD and with the  
93 disassembly of the kinetochore corona, in a process traditionally known as “shedding” (Auckland  
94 et al., 2020; Basto et al., 2004; Howell et al., 2001; Mische et al., 2008; Sivaram et al., 2009; Varma  
95 et al., 2008; Williams et al., 1996; Wojcik et al., 2001).

96 Corona shedding also coincides with silencing of SAC signaling at the particular kinetochore  
97 undergoing conversion to end-on attachment (Kuhn and Dumont, 2017; Kuhn and Dumont,  
98 2019). The corona promotes the SAC by providing a docking site for the recruitment of the  
99 MAD1:MAD2 core complex, which is crucially required for checkpoint signaling (De Antoni et  
100 al., 2005; Faesen et al., 2017). SAC silencing is therefore caused by the removal, during corona  
101 shedding, of the MAD1:MAD2 core complex, which ultimately suppresses catalytic assembly of

102 the checkpoint effector, the mitotic checkpoint complex (MCC) (Allan et al., 2020; Basto et al.,  
103 2000; Buffin et al., 2005; Caldas et al., 2015; Fava et al., 2011; Jackman et al., 2020; Kops et al.,  
104 2005; Matson and Stukenberg, 2014; Rodriguez-Rodriguez et al., 2018; Silio et al., 2015; Zhang et  
105 al., 2015).

106 The 812-kDa RZZ complex, whose subunits are shown schematically in **Figure 1A**, is a 2:2:2  
107 hexamer (Civril et al., 2010; Mosalaganti et al., 2017; Scaerou et al., 2001). The RZZ is considered  
108 the corona's building block (Mosalaganti et al., 2017; Pereira et al., 2018; Sacristan et al., 2018).  
109 While there is considerable interest in understanding how the RZZ promotes corona assembly,  
110 there is only limited structural insight into this process. An early structural analysis revealed the  
111 crystal structure of Zwilch and identified the 2209-residue ROD protein as a member of a family  
112 of proteins, which also includes clathrin, consisting of an N-terminal  $\beta$ -propeller followed by a  
113 long  $\alpha$ -solenoid (Civril et al., 2010). Reconstitution of the RZZ and a single particle electron cryo  
114 microscopy (cryo-EM) structure, limited to an average resolution of approximately 10-12 Å,  
115 offered the first comprehensive view of the organization of the RZZ hexamer (Altenfeld et al.,  
116 2015; Mosalaganti et al., 2017). The reconstruction demonstrated that two highly elongated ROD  
117 protomers are arranged in an anti-parallel configuration and that a ZW10 dimer cements this  
118 organization in its central region, while Zwilch occupies a more peripheral position, between  
119 ZW10 and the ROD  $\beta$ -propeller (Mosalaganti et al., 2017). Also based on homologous proteins  
120 of known structure but very limited sequence homology, structural models were built for ROD  
121 and ZW10 to fit the EM reconstruction (Mosalaganti et al., 2017). This previous work, however,  
122 failed to provide a detailed molecular description of the RZZ subunits and of their interactions.  
123 Here, we fill this gap by reporting a high-resolution structure of the RZZ complex, obtained by  
124 single-particle cryo-EM that finally reveals all its detailed structural features.

125 Spindly is a member of a large family of DD adaptors (Reck-Peterson et al., 2018) shown to  
126 activate dynein motility *in vitro* (Cianfrocco et al., 2015; Gama et al., 2017; Hoogenraad and  
127 Akhmanova, 2016; McKenney et al., 2014; Pereira et al., 2018; Sacristan et al., 2018; Schlager et  
128 al., 2014). How Spindly coordinates its interaction with RZZ with activation of DD motility and  
129 processivity remains poorly understood. Spindly binds directly to the RZZ complex through its  
130 C-terminal region (forming the complex abbreviated as RZZS), and engaging an RZZ module  
131 comprising the ROD  $\beta$ -propeller and Zwilch (Gama et al., 2017; Henen et al., 2021; Mosalaganti  
132 et al., 2017; Pereira et al., 2018; Sacristan et al., 2018). Furthermore, in humans and likely most  
133 other metazoans, Spindly is post-translationally modified on Cys602 with farnesyl, an isoprenoid  
134 lipid. This modification, which is required for the interaction of Spindly with RZZ, may engage a

135 dedicated binding site on the ROD  $\beta$ -propeller (Gama et al., 2017; Holland et al., 2015;  
136 Mosalaganti et al., 2017; Moudgil et al., 2015).

137 Besides interacting with RZZ, Spindly is also required for kinetochore recruitment of DD (Barisic  
138 et al., 2010; Chan et al., 2009; Cheerambathur et al., 2013; Gama et al., 2017; Gassmann et al.,  
139 2008; Gassmann et al., 2010; Griffis et al., 2007; Raaijmakers et al., 2013; Starr et al., 1998;  
140 Yamamoto et al., 2008). The determinants of RZZ binding and DD recruitment by Spindly are  
141 separable. A region of Spindly, the Spindly motif, shown to be a conserved feature of adaptors,  
142 can be mutated to abrogate kinetochore recruitment of DD (Gama et al., 2017; Gassmann et al.,  
143 2010; Pereira et al., 2018; Sacristan et al., 2018). The mutation is compatible with corona expansion  
144 and chromosome bi-orientation, but preventing DD recruitment leads to a permanent SAC arrest  
145 caused by the inability to disassemble (strip) the corona and silence the SAC (Gama et al., 2017;  
146 Gassmann et al., 2010; Pereira et al., 2018; Sacristan et al., 2018).

147 Initial studies in humans and *C. elegans* identified conditions *in vitro* and in living cells for RZZ  
148 assembly into filamentous structural mimics of the corona, pointing to the RZZ as a candidate  
149 building block of the corona (Henen et al., 2021; Pereira et al., 2018; Sacristan et al., 2018). These  
150 recent studies, however, also brought to light different minimal requirements for filament assembly  
151 (Pereira et al., 2018; Sacristan et al., 2018), with species-specific differences and a persisting  
152 question on whether Spindly is necessary for filament assembly and acts as gatekeeper in this  
153 process. Corona assembly is limited to kinetochores and is sensitive to the cellular concentration  
154 of RZZ (Pereira et al., 2018), suggesting it requires a critical concentration that is exclusively  
155 reached upon RZZ recruitment to kinetochores in early prometaphase. Kinetochore recruitment,  
156 however, is not sufficient for corona assembly in human cells, because the depletion of Spindly or  
157 the inhibition of the SAC kinase MPS1 prevent expansion of the corona without preventing  
158 kinetochore recruitment of the RZZ (Pereira et al., 2018; Rodriguez-Rodriguez et al., 2018). Here,  
159 we have recapitulated with purified components *in vitro* the requirement for human ROD  
160 phosphorylation by MPS1 and Spindly binding for corona assembly. This assay allowed us to  
161 identify various additional requirements for nucleation of filaments by the RZZS complex, and to  
162 acquire structural information on the mechanism of filament assembly that was related to the high-  
163 resolution structure of the RZZ. We present a model for corona assembly whose implications  
164 were extensively corroborated with experiments in mitotic cells. Collectively, our results greatly  
165 advance our understanding of a fundamental aspect of kinetochore structure and function.

166

167 **Results**

168 **Reconstitution and structural analysis of the RZZ complex** Using reconstituted human RZZ  
169 (Altenfeld et al., 2015; Mosalaganti et al., 2017), we previously reported a single particle cryo-EM  
170 reconstruction of the RZZ at an overall resolution of  $\sim 10\text{-}12 \text{ \AA}$  ( $1 \text{ \AA} = 0.1 \text{ nm}$ ). As only the  
171 structure of Zwilch (Civril et al., 2010) (PDB ID 3IF8) had been experimentally determined, we  
172 had tried to account for the observed density by building *ad hoc* homology models of ROD or  
173 ZW10 and fitting them in the 3D reconstruction (Mosalaganti et al., 2017). Due to the very low  
174 resolution of the reconstructions, however, the resulting models were merely tentative.

175 To improve the resolution of the RZZ structure, we used an mCherry-tagged RZZ construct  
176 (<sup>mCh</sup>RZZ) that was better expressed than the previously used poly-histidine-tagged RZZ (see  
177 **Methods**). In addition, purified <sup>mCh</sup>RZZ proved to be more stable than the previous construct,  
178 allowing us to determine the structure of the complex by cryo-EM at a resolution of  $3.9 \text{ \AA}$  (**Figure**  
179 **1B**). The new reconstruction allowed us to build an essentially complete atomic model of ZW10  
180 and the central region of ROD. In the periphery of RZZ, where the resolution of the  
181 reconstruction was lower than in the center and therefore did not allow unequivocal model  
182 building, we resorted to high-confidence AlphaFold2 (AF2; (Jumper et al., 2021; Tunyasuvunakool  
183 et al., 2021)) predictions, and used flexible fitting with minimal interventions, to fit them in the  
184 density (**Figure 1 –Supplement 1**).

185 While related to our previous low-resolution model in its general outline, the new model provides  
186 a detailed description of all crucial molecular features of the RZZ complex. The RZZ complex is  
187 a 2:2:2 hexamer with C2 symmetry. The 2-fold-related ROD chains (A and B) run in an anti-  
188 parallel configuration that sets the  $\sim 45\text{-nm}$  long and  $\sim 10 \text{ nm}$  wide dimensions of the RZZ (**Figure**  
189 **1C-D**). After an N-terminal 7-bladed  $\beta$ -propeller, the ROD chain transitions, near residue 395,  
190 into a short helical hairpin that begins an uninterrupted but irregular  $\alpha$ -solenoid that extends until  
191 the C-terminus.

192 Several proteins share with ROD a succession of an N-terminal  $\beta$ -propeller followed by a C-  
193 terminal  $\alpha$ -solenoid. These include Clathrin, COP1, the Nup155 and Nup145 nucleoporins, Sec31,  
194 Sec39, and even the APC1 subunit of the APC/C (Alfieri et al., 2017; Brohawn et al., 2008; Fath  
195 et al., 2007; Fotin et al., 2004; Lee and Goldberg, 2010; Stagg et al., 2006; Stagg et al., 2007; ter  
196 Haar et al., 1998; Watson et al., 2019). In comparison to the 1675-residue Clathrin heavy chain or  
197 the 1944-residue APC1, the 2209-residue ROD  $\alpha$ -solenoid is significantly more elongated and  
198 straighter (**Figure 2 – Supplement 1A**). Packing of successive helical hairpins against each other  
199 with a slight right- or a left-handed rotation is a typical pattern of regular  $\alpha$ -solenoids. This pattern  
200 is also observed for blocks of successive helical hairpins in ROD, but there are points where the

201 hairpins rather pack almost at a right angle, deflecting the polypeptide chain (Figure 2 –  
202 Supplement 1A). There are at least three points where the ROD chain bends sharply, around  
203 residues 856 and 1060 in the central region, and around residue 1905 in the C-terminal region. The  
204 latter kink generates a characteristic C-terminal “hook” that is perpendicular to the opposite ROD  
205 chain (Figure 2A and Figure 2 – Supplement 1A). This is a prominent interaction interface between  
206 ROD-A and ROD-B, as residues 1790-2125, which encompass part of the hook domain, form a  
207 cradle that interacts with residues 505-690 of the opposing ROD protomer, including residues  
208 655-680, situated in an inter-helical loop (Figure 2B).

209 Zwlch abuts the ROD  $\beta$ -propeller and forms a direct, extensive interface with only one of the  
210 ROD protomers, with only a small contact with the hook domain of the second ROD molecule  
211 (Figure 2C). Contacts of Zwlch with ROD terminate around residue 850 of ROD, where Zwlch  
212 also contacts ZW10 in a small 3-way interface. As expected, the structure of Zwlch in the RZZ  
213 complex is closely related to the crystal structure of Zwlch obtained in isolation (Civril et al.,  
214 2010), but adopts a more open conformation due to a reciprocal rotation of Zwlch’s two domains,  
215 presumably elicited by contacts within the complex (Figure 2 – Supplement 1B).

216 Finally, ZW10 adopts a highly curved, U-shaped conformation, a major determinant of which is  
217 the sharp bending around residue 395, situated between the N- and C-terminal domains (Figure  
218 2D and Figure 2 – Supplement 1C). ZW10-related domains are found in Dsl1 and Tip20, subunits  
219 of vesicle tethering complexes in *S. cerevisiae*. Like ZW10, they both consist of two roughly equally  
220 sized helical domains (Tripathi et al., 2009), but are characterized by different inter-domain angles  
221 (Figure 2 – Supplement 1). Indeed, the isolated ZW10 shows high flexibility between its two  
222 domains (Mosalaganti et al., 2017).

223 In the RZZ, the interface between the A and B protomers of ZW10, which intersects the 2-fold  
224 symmetry axis of the RZZ complex, is relatively small (Figure 2D-F). Accordingly, AF2 does not  
225 predict any solitary ZW10 dimer in a conformation seen in the RZZ complex (unpublished  
226 results). ZW10 A and B, however, are stably set inside an “eye” between the two ROD chains  
227 (compare panels A and E in Figure 2), with which they form a very extensive interaction interface.  
228 Specifically, residues 850-980, 1050-1090, and 1135-1400 of ROD-A interact with ZW10-A,  
229 ZW10-B, and ZW10-A, respectively. The N-terminal regions of ZW10 are prominent features that  
230 emerge almost perpendicularly from the RZZ’s long axis. Together with the C-terminal region of  
231 ZW10, they are among the best conserved sequence features of the RZZ complex (Figure 1E-F;  
232 alignments are provided in Figure 1 – Supplement 2).

233

234 **ROD's farnesyl binding site** The interaction of Spindly with RZZ is direct and requires  
235 isoprenylation of Spindly with a farnesyl group at Cys602 (Mosalaganti et al., 2017) (Figure 3A).  
236 Using various farnesyl moieties modified with photoactivatable cross-linkers and enzymatically  
237 incorporated in Spindly, we previously mapped a farnesyl binding site near Leu120 of ROD  
238 (Mosalaganti et al., 2017). This residue is located in proximity of a prominent feature of the ROD  
239  $\beta$ -propeller, the insertion of an  $\alpha$ -helical hairpin (residue 168-190) between strands  $\beta$ 3C and  $\beta$ 3D  
240 (Figure 3B and Figure 1 – Supplement 2). The hairpin abuts against blade 2 of the propeller, partly  
241 bending it and increasing its separation from blade 3, and generating a deep, roughly cylindrical  
242 cavity between the two blades (Figure 3C). Remarkably, Leu120 lines the entry point of the cavity.  
243 AF2 predicts the C-terminal region of Spindly to interact with this region of the ROD  $\beta$ -propeller,  
244 and modelling the farnesyl group on Cys602 shows that the cavity is ideally dimensioned to receive  
245 the farnesyl group (Figure 3D-G).

246 The entire cavity is lined with hydrophobic residues, including Leu100, Leu108, Leu110, Leu119,  
247 Leu120, Phe124, Met153, Ile164, Leu167, Leu169, and Ile191, in addition to two polar residues,  
248 Asn122 and Ser193 (Figure 3E-F). To test the role of this pocket in the binding of farnesylated  
249 Spindly (Spindly<sup>F</sup>), we tried to occlude it by generating two mutant RZZ complexes in which  
250 hydrophobic residues lining the farnesyl-binding pocket were replaced with bulkier ones (as  
251 described in the legend of Figure 3G). Confirming our hypothesis, the resulting mutants were  
252 stable but apparently unable to interact with Spindly<sup>F</sup> in a size-exclusion chromatography  
253 experiment, contrarily to wild type RZZ, with which Spindly<sup>F</sup> formed a stoichiometric complex  
254 (Figure 3G).

255 The *C. elegans* and *D. melanogaster* Spindly sequences have no C-terminal cysteine for isoprenylation  
256 (Holland et al., 2015). Analysis of ROD sequences in these organisms demonstrates differences  
257 predicted to ablate the hydrophobic farnesyl-binding cavity observed in human ROD. Specifically,  
258 in both species, the first of the two  $\alpha$ -helices in the  $\alpha$ -helical hairpin insertion that contributes to  
259 the architecture of the farnesyl-binding cavity is shorter by 3-residues (Figure 1 – Supplement 2).  
260 AF2 predicts that this causes a rotation of the second  $\alpha$ -helix, positioning the side chain of Met184  
261 (CeROD) precisely in the center of the cavity, obstructing it and making it inviable for farnesyl  
262 binding (Figure 3 – Supplement 1).

263

264 **MPS1 nucleates RZZS fibers** The requirements for corona expansion remain incompletely  
265 characterized. For instance, deletion of the ROD-1  $\beta$ -propeller (residues 1-372) promotes ectopic  
266 filament formation in *C. elegans* embryos, while the equivalent deletion (residues 1-375) prevents



267 expansion in human cells (Gama et al., 2017; Pereira et al., 2018). *In vitro*, a complex of CeZW10  
268 (CZW-1) and CeROD with a deleted N-terminal propeller assembles a polymeric filamentous  
269 structure, whereas a full-length ternary complex is unable to polymerize (Pereira et al., 2018).  
270 Conversely, *in vitro* filament assembly of human RZZ, elicited by mild heating, requires Spindly<sup>F</sup>  
271 (Sacristan et al., 2018). Furthermore, an N-terminal deletion removing 65 residues of Spindly  
272 promotes ectopic filament assembly in human cells even when Spindly is not farnesylated, an  
273 otherwise necessary condition for RZZ:Spindly binding and corona assembly (Sacristan et al.,  
274 2018).

275 To shed light on the corona assembly mechanism, we set out to dissect it *in vitro* with purified  
276 components. Using a spinning disk confocal microscope, we monitored polymerization of  
277 fluorescent mCherry-tagged RZZ or RZZS<sup>F</sup> under various conditions after their purification to  
278 homogeneity and thorough dephosphorylation. At 20°C, neither <sup>mCh</sup>RZZ nor <sup>mCh</sup>RZZS<sup>F</sup> (at a  
279 concentration of 4 μM) formed visible polymers (unpublished results and see below). Conversely,  
280 and in agreement with our previous observations (Sacristan et al., 2018), incubation of <sup>mCh</sup>RZZS<sup>F</sup>  
281 for 1 hour at 30°C promoted formation of copious fibers (Figure 4A). No fibers were observed  
282 with <sup>mCh</sup>RZZ or <sup>mCh</sup>Spindly<sup>F</sup> (Figure 4A), indicating that Spindly<sup>F</sup> is required for fiber formation.

283 Previous studies identified a role of the MPS1 kinase, a central SAC component, in corona  
284 expansion in human cells (Rodriguez-Rodriguez et al., 2018; Sacristan et al., 2018). Regulatory  
285 effects of phosphorylation of corona components by additional mitotic kinases have also been  
286 reported (Allan et al., 2020; Barbosa et al., 2020; Pereira et al., 2018; Rodriguez-Rodriguez et al.,  
287 2018; Sacristan et al., 2018). We therefore asked if mitotic kinases influenced corona assembly in  
288 our assay *in vitro*. When subjected to sub-stoichiometric concentrations (typically 1/4  
289 kinase/substrate ratio) of various mitotic kinases *in vitro* at 20°C in presence of ATP, <sup>mCh</sup>RZZS<sup>F</sup>  
290 sample was phosphorylated by MPS1 on ROD, and by CDK1:Cyclin-B and to a minor extent by  
291 BUB1 on Spindly<sup>F</sup> (as visualized by staining with the Pro-Q<sup>TM</sup> Diamond Gel Staining Reagent;  
292 Figure 4B).

293 In line with a role of MPS1 phosphorylation of ROD in corona assembly (Rodriguez-Rodriguez  
294 et al., 2018; Sacristan et al., 2018), addition of MPS1 and ATP promoted spontaneous assembly of  
295 fibers at 20°C, an effect that was eliminated in presence of reversine, an MPS1 inhibitor  
296 (Santaguida et al., 2010). Conversely, PLK1, Aurora B, BUB1, CDK1:Cyclin-B did not promote  
297 fiber assembly, even when combined (Figure 4C). Subjecting <sup>mCh</sup>RZZ or Spindly<sup>F</sup> to MPS1  
298 phosphorylation before mixing them to form a complex showed that only ROD needs to be  
299 phosphorylated for fibers to assemble (Figure 4 – Supplement 1A-B). Spindly required

300 farnesylation for filamentation because a C602A mutant failed to filament (Figure 4 – Supplement  
301 1C).

302 To corroborate these results in an *in vivo* setting, we released HeLa cells from a G2-phase arrest  
303 into mitosis in presence of nocodazole and reversine to depolymerize microtubules and inhibit  
304 MPS1, respectively. MPS1 inhibition by reversine was confirmed by severe reduction of BUB1  
305 kinetochore levels (Figure 4 – Supplement 1D-E), as reported previously (Santaguida et al., 2010).  
306 Both Zwilch and Spindly decorated kinetochores when MPS1 was inhibited, albeit at a slightly  
307 reduced level in comparison with the control condition in absence of MPS1 inhibitors (Figure 4D-  
308 E, quantified in panel F). However, corona expansion had been clearly completely inhibited in  
309 presence of reversine, because Zwilch and Spindly showed the same dotted appearance of inner  
310 kinetochore markers instead of the crescent-like appearance observed in control cells (Figure 4D-  
311 E).

312 Next, we asked if Spindly is necessary for corona expansion as predicted by our results *in vitro*.  
313 After depleting Spindly by RNAi (Figure 4G-H), we detected CENP-E and Zwilch at reduced but  
314 still highly significant levels on kinetochores of nocodazole-arrested mitotic cells. As for MPS1  
315 inhibition, however, also in this case we observed an essentially complete failure to expand the  
316 corona (Figure 4I-J). Thus, neither Spindly nor MPS1 phosphorylation are strictly required for  
317 RZZ recruitment to the kinetochore. However, both are indispensable for expanding the corona.

318 Thus, the *in vitro* corona assembly assay we describe is an excellent predictor of cellular events at  
319 the corona, and leads to conclude that the presence of RZZ, Spindly, and active MPS1 are  
320 necessary to promote assembly of the corona at the kinetochore. Because corona assembly is  
321 limited to kinetochores, however, there must be additional signals to enrich the corona  
322 constituents to these subcellular compartments. When added to mitotic cells with an already  
323 formed corona, the selective cyclin-dependent kinase 1 (CDK1) inhibitor RO3306 (Vassilev et al.,  
324 2006) promoted corona detachment from the kinetochore, but no corona disassembly, as  
325 described previously (Pereira et al., 2018; Sacristan et al., 2018) (Figure 4 – Supplement 1F-G).  
326 Conversely, the selective Aurora B kinase inhibitor Hesperadin (Hauf et al., 2003) erased the  
327 recruitment of both RZZ (and therefore Spindly) and CENP-E to the kinetochore (Figure 4 –  
328 Supplement 1H). Thus, both CDK1 and Aurora B are essential for directing or retaining the  
329 corona to the kinetochore, but our results *in vitro* strongly suggest that they do so on the  
330 kinetochore side of the binding interface for the corona.

331

332 ***The role of MPS1 phosphorylation*** Thr13 and Ser15 of ROD were previously identified as MPS1  
333 substrates required for corona assembly (Rodriguez-Rodriguez et al., 2018). In agreement with  
334 these results, we found that a <sup>mCh</sup>RZZS<sup>F</sup> mutant complex where ROD<sup>Thr13</sup> and ROD<sup>Ser15</sup> were  
335 mutated to alanine (T13A/S15A) did not assemble fibers (Figure 5A). The phosphomimetic  
336 mutant T13E/S15E, on the other hand, allowed <sup>mCh</sup>RZZS<sup>F</sup> to form fibers at 20°C and in presence  
337 of reversine to abrogate MPS1 activity (Figure 5A and Figure 5 – Supplement 1A-B). The  
338 T13E/S15E mutant, however, failed to form fibers when Spindly<sup>F</sup> was omitted. This confirms  
339 that Spindly<sup>F</sup> is absolutely necessary for fiber formation even after bypassing MPS1 activity.  
340 Collectively, these results confirm that our fiber formation assay *in vitro* recapitulates crucial aspects  
341 of corona assembly.

342 The inability of the T13A/S15A mutant of <sup>mCh</sup>RZZS<sup>F</sup> to form fibers did not reflect a requirement  
343 of these residues in fiber assembly, because fibers of this mutant were observed after mildly heating  
344 the sample to 30°C (Figure 5 – supplement 1A). Fibers never formed when Spindly<sup>F</sup> was omitted  
345 (Figure 5 – supplement 1B). Thus, T13 and S15 may not be required for a direct physical  
346 interaction of <sup>mCh</sup>RZZS<sup>F</sup> complexes (protomers) in the fiber. Rather they may be required for auto-  
347 inhibition of filament nucleation and growth. To shed light on how this region of ROD controls  
348 fiber formation, we asked if we could structurally model it. The ROD β-propeller begins with the  
349 β7d strand around residue Leu30 (Figure 5B-C). The N-terminal residues that precede this point  
350 of entry into the β-propeller cannot be mapped with certainty in the reconstruction, due to its  
351 limited resolution in this peripheral region. However, AF2 predicts that this region first augments  
352 blade 7 of the ROD β-propeller with an additional β-strand (β7e), external to the outermost β7d  
353 of the 4-strand propeller; then, after forming a helical turn that packs against the top part of blade  
354 7, it also augments blade 6 with a short β6e strand that pairs with β6d, before finally entering the  
355 β-propeller (Figure 5C).

356 Based on these observations, we speculate that phosphorylation of Thr13 and Ser15 by MPS1  
357 restructures the N-terminal region of ROD, relieving auto-inhibition and allowing interactions  
358 required for the nucleation and growth of RZZS filaments, possibly mediated by blades 6 and 7.  
359 To test this idea, we reasoned that if MPS1 phosphorylation of ROD were exclusively required to  
360 promote nucleation of <sup>mCh</sup>RZZS<sup>F</sup> filaments, the stability of already formed filament should remain  
361 unaffected after ROD dephosphorylation. Indeed, successful dephosphorylation of <sup>mCh</sup>RZZS<sup>F</sup>  
362 filaments with lambda phosphatase (Figure 5D) did not visibly interfere with filament number or  
363 stability (Figure 5E). An <sup>mCh</sup>RZZS<sup>F</sup> complex containing a <sup>mCh</sup>ROD deletion mutant lacking the N-  
364 terminal 15 residues (<sup>mCh</sup>ROD<sup>Δ15</sup>) was insensitive to MPS1 phosphorylation, but, like the

365 T13A/S15A mutant, formed fibers when heat-treated (Figure 5F). Thus, <sup>mCh</sup>ROD<sup>Δ15</sup> remains auto-  
366 inhibited, probably due to the residual capping of blade 6 with the β6e strand, which we speculate  
367 to be crucially required for fiber assembly.

368

369 **Zwilch contributes directly to fiber assembly** Previous studies implicated two highly conserved  
370 Zwilch residues, Glu422 and Asp426, in corona expansion in humans and nematodes (Gama et  
371 al., 2017; Pereira et al., 2018). To assess if these residues also have a direct effect on corona  
372 assembly *in vitro*, we engineered a <sup>mCh</sup>RZZS<sup>F</sup> complex containing alanine mutants of these residues  
373 (E422A/D426A). The E422A/D426A mutant complex failed to form fibers, both upon MPS1  
374 phosphorylation and upon heating (Figure 5G). This was not caused by an impairment of the  
375 interaction of RZZ with Spindly, as the latter was unperturbed (Figure 5 – Supplement 1C). Thus,  
376 Zwilch contributes directly to fiber assembly. The two conserved Zwilch residues are solvent  
377 exposed and are part of a continuous face of the RZZ complex that also comprises blade 6 of the  
378 ROD β-propeller and the N-terminal region of ZW10 (Figure 5H), suggestive of an extensive  
379 interaction interface for corona expansion.

380

381 **The RZZS polymers** To shed further light into the polymerization mechanism, we used negative-  
382 stain EM to visualize the <sup>mCh</sup>RZZS<sup>F</sup> fibers obtained after mild heating or incubation with MPS1  
383 kinase. Under either condition, the fibers appeared as flat sheets, consisting of somewhat irregular  
384 filaments packing side-a-side. The sheets co-existing with unpolymerized complexes and with  
385 small oligomers (Figure 6A). Essentially identical sheets were obtained with a complex containing  
386 untagged ROD (RZZS<sup>F</sup>, Figure 6 – Supplement 1A), or with complexes expressing the ROD  
387 mutants T13A/S15A, T13E/S15E, and Δ15 (Figure 6 – Supplement 1B). The sheets were not  
388 sufficiently ordered for a successful application of cryo-EM reconstruction methods.

389 Polymerization attempts with an RZZS complex where Spindly was also tagged with an N-terminal  
390 mCherry moiety (<sup>mCh</sup>RZZ/<sup>mCh</sup>S<sup>F</sup>) prevented formation of fibers and rather promoted formation of  
391 complete rings, or of segments thereof of comparable curvature (Figure 6B), and regardless of  
392 whether initiated by heat or MPS1. Essentially identical figures were also observed with an  
393 equivalent complex containing GFP-tagged Spindly (<sup>mCh</sup>RZZ/<sup>GFP</sup>S<sup>F</sup>; Figure 6 – Supplement 1C),  
394 even with untagged ROD (RZZ/<sup>GFP</sup>S<sup>F</sup>; Figure 6C). Cleavage of the GFP moiety from the latter  
395 construct after polymerization into rings promoted the lateral association of the filamentous rings  
396 into bundled rings, with a texture that was considerably less dense than that of the sheets,

397 suggesting that bundles of rings do not pack as tightly as bundles of filaments in the sheets (Figure  
398 6C).

399 Thus, N-terminal tagging of Spindly promotes the assembly of rings or curved filaments. The  
400 curvature of the rings, whose average diameter is approximately 0.65  $\mu\text{m}$  (Figure 6D), is remarkably  
401 similar to the curvature of kinetochore crescents when the corona expands (Magidson et al., 2015).  
402 Two-dimensional (2D) class averages of short segments of the negatively stained samples  
403 comprising a few consecutive ring subunits revealed a substantial orientation preference that  
404 ultimately prevented the successful calculation of a 3D reconstruction (Figure 6 – Supplement  
405 1D). Similar analyses on filaments at cryogenic temperatures suffered from the same extreme  
406 orientation preferences and were unsuitable for coherent reconstructions (unpublished data).  
407 Nonetheless, these analyses revealed that the rings appear to have a period of approximately half  
408 of the RZZ length ( $\approx 23$  nm) and a width comparable to that of the RZZ ( $\approx 11$  nm) (Figure 6 –  
409 Supplement 1E), suggesting that they form through staggering of individual RZZS complexes.

410

411 ***The role of Spindly*** To shed light on how Spindly promotes corona assembly, we investigated the  
412 corona assembly propensity of various Spindly deletion mutants, including Spindly<sup>250-C</sup> and  
413 Spindly<sup>354-C</sup>, where the CC1a/b segment of Spindly (250-C) or the CC1a/b and CC2 segments  
414 (354-C) are deleted, respectively (Figure 3A). Both Spindly constructs, upon farnesylation,  
415 interacted with the RZZ complex in size-exclusion chromatography experiments (Figure 7A).  
416 Conversely, a further deletion construct, Spindly<sup>440-C</sup>, was unable to interact with the RZZ complex.  
417 While Spindly<sup>250-C</sup> supported corona expansion *in vitro* upon MPS1 phosphorylation and mild  
418 heating, indistinguishably from full-length Spindly, Spindly<sup>354-C</sup> did not support corona assembly  
419 (Figure 7B and Figure 7 – Supplement 1A). Furthermore, while Spindly<sup>354-C</sup> bound the RZZ *in*  
420 *vitro*, it was unable to decorate kinetochores after introduction by electroporation into HeLa cells  
421 depleted of endogenous Spindly (Figure 7C-D, quantified in panel E). As expected, therefore,  
422 there was no expansion of the corona in these cells, as shown by the dot-like appearance of CENP-  
423 E, contrasting its crescent-like appearance observed in control cells with a well-formed corona.  
424 Spindly decorates kinetochores even when corona expansion is suppressed with an MPS1 inhibitor  
425 (Figure 4E), indicating that its localization to kinetochores is not contingent on corona expansion.  
426 Thus, failure of Spindly<sup>354-C</sup> to reach kinetochores is unlikely to reflect its inability to assemble the  
427 corona (Figure 7C). Rather, Spindly<sup>354-C</sup> may bind RZZ with reduced affinity, or may be unable to  
428 interact with one or more additional kinetochore receptors ultimately required to stabilize the  
429 RZZS complex.

430 Collectively, these results indicate that a segment of Spindly encompassing residues 250-353  
431 contains a critical determinant of corona assembly and kinetochore recruitment, possibly distinct  
432 or even overlapping. To shed further light on this question, we took advantage of our previous  
433 observation that Spindly<sup>1-275</sup> and Spindly<sup>306-C</sup> are stable Spindly construct (Mosalaganti et al., 2017;  
434 Sacristan et al., 2018) to build a new deletion mutant, Spindly<sup>Δ276-306</sup>. Spindly<sup>Δ276-306</sup> bound robustly  
435 to the RZZ complex in size-exclusion chromatography experiments (Figure 7 – Supplement 1B),  
436 but was unable to support corona expansion *in vitro* (Figure 7B) and failed to reach the kinetochore  
437 (Figure 7F, quantified in panel G; note that the very modest mCherry signal shown to overlap with  
438 the centromere and inner kinetochore is a localization artifact of the mCherry tag). In conclusion,  
439 these results identify a segment comprising 31 residues of Spindly (276-306) as a crucial  
440 determinant of Spindly kinetochore localization and corona expansion.

441

## 442 Discussion

443 The high-resolution cryo-EM structure of the RZZ complex reported here crowns a succession  
444 of studies that began with the biochemical reconstitution and bioinformatic analysis of RZZ  
445 subunits, the determination of the crystal structure of Zwilch, and the report of a low-resolution  
446 EM reconstruction of the RZZ (Altenfeld et al., 2015; Civril et al., 2010; Mosalaganti et al., 2017).  
447 Our new structural analysis leveraged a pipeline that combined experimental structure  
448 determination using cryo-EM, model building based on experimental 3D reconstructions, and the  
449 enhanced prediction capabilities of AlphaFold2 (Jumper et al., 2021; Tunyasuvunakool et al.,  
450 2021), which were instrumental for model building in more peripheral regions of the  
451 reconstruction where the local resolution did not allow *de novo* model building. Collectively, this  
452 pipeline allowed us to reveal the structure of the RZZ complex at near-atomic resolution. The new  
453 structure explains how intermolecular interactions of the subunits promote the assembly of the  
454 RZZ complex; it also explains how RZZ interacts with the farnesyl moiety of Spindly; finally, it  
455 sets the basis for understanding how RZZ assembles into supramolecular structures in the corona.

456 We refined an *in vitro* assay for corona reconstitution that allowed us to probe several aspects of  
457 the polymerization reaction. First, we demonstrate that RZZS oligomerization *in vitro* into flat  
458 sheets or rings is kinetically controlled, and can be induced either by raising temperature or by  
459 addition of the MPS1 kinase. Under all tested conditions, RZZ polymerization *in vitro* required  
460 Spindly<sup>F</sup>, implicating it as a crucial building block of the corona. Two non-mutually exclusive  
461 possibilities are that Spindly<sup>F</sup> contributes directly to binding interfaces required for polymerization,  
462 or that it induces a conformational change in the RZZ required for polymerization. Our initial

463 efforts to reveal the structure of the RZZS<sup>F</sup> filament were thwarted by the limited order of the  
464 fibers we have obtained and by a very limited number of orientations on the EM grids. Future  
465 work will have to address this bottleneck, shedding light on the organization of the individual  
466 RZZS complex and of its polymeric form.

467 Nonetheless, our studies identified and mutationally probed several crucial interfaces for  
468 polymerization, including the N-terminal region of Spindly and a conserved acidic residue pair in  
469 Zwilch. Human RZZS<sup>F</sup> polymerizes efficiently at 30°C *in vitro* in the absence of a kinetochore  
470 support, whereas its polymerization in cells is seeded by the kinetochore and never extends far  
471 from it. While this may seem to suggest that other control mechanisms prevent RZZS  
472 oligomerization away from kinetochores, it should be considered that our experiments *in vitro* were  
473 carried out at RZZS<sup>F</sup> concentrations (usually 4 μM) likely to be approximately two orders of  
474 magnitude higher than those existing in cells, as inferred by the fact that most SAC components  
475 have concentrations comprised between 10 and 100 nM (Simonetta et al., 2009). High  
476 concentration of building blocks likely facilitates polymerization, and indeed RZZS<sup>F</sup> filaments  
477 became sporadic or were not any longer observed at mid-nanomolar concentrations of RZZS<sup>F</sup>  
478 (Figure 7 – Supplement 1C). A second crucial factor likely explaining why RZZS filaments form  
479 only at kinetochores is that RZZS polymerization appears to be kinetically controlled, with MPS1  
480 phosphorylation acting as catalyst to remove a steric blockade to oligomerization involving the  
481 ROD N-terminal region. As kinetochores enrich MPS1 during mitosis, and MPS1 activity is  
482 highest at these structures, albeit not limited to them (Kuijt et al., 2020), polymerization may  
483 become naturally spatially limited to kinetochores.

484 This mechanism of corona assembly bears similarities to the process of coat assembly that drives  
485 intracellular trafficking of membranous organelles. In addition to evident structural similarities,  
486 most notably of ROD with Clathrin and COPs, which are also characterized by a succession of an  
487 N-terminal β-propeller and a C-terminal α-solenoid, both processes are spatially and kinetically  
488 controlled so that they occur only at defined cellular locales and in presence of appropriate triggers  
489 (Arakel and Schwappach, 2018; Sigismund et al., 2021). The high-affinity binding site that drives  
490 RZZ recruitment to the kinetochore remains elusive, but appears to be confined within the KMN  
491 network (Caldas et al., 2015; Chan et al., 2009; Miller et al., 2008; Pagliuca et al., 2009; Pereira et  
492 al., 2018; Sundin et al., 2011; Varma et al., 2013).

493 At least two kinases, in addition to MPS1, are also required for assembly and/or retention of the  
494 corona, CDK1 and Aurora B. Acute inhibition of these kinases results respectively in the  
495 detachment of the assembled corona from the kinetochore (CDK1) and in the complete depletion

496 of corona components at kinetochores (Aurora B). In experiments with purified kinases *in vitro*,  
497 we did not find prominent Aurora B phosphorylation sites on the RZZS<sup>F</sup> complex, suggesting that  
498 Aurora B does not controls corona assembly directly. Because Aurora B is critically required for  
499 MPS1 recruitment to kinetochores (Nijenhuis et al., 2013; Santaguida et al., 2010), we suspect that  
500 Aurora B inhibition blocks the essential function of MPS1 as promoter of corona assembly. On  
501 the other hand, CDK1 phosphorylates Spindly<sup>F</sup> efficiently *in vitro*, but without triggering  
502 filamentation. It is possible that the detachment of the corona after CDK1 inhibition reflects an  
503 essential role of CDK1 phosphorylation of Spindly in its kinetochore recruitment (e.g. by creating  
504 a phospho-dependent binding site or conformational change). In this case, CDK1 inhibition may  
505 be recapitulated by expression of non-phosphorylatable mutants of Spindly. Alternatively, CDK1  
506 may contribute to the generation of a binding site for the RZZS on the kinetochore.

507 Previous observations identified RZZ and Spindly as being both necessary for corona assembly in  
508 human cells (Rodriguez-Rodriguez et al., 2018; Sacristan et al., 2018). Our results *in vivo* are  
509 consistent with this tenet, but are further supported by polymerization experiments *in vitro* that  
510 showed a nearly perfect correlation with corona assembly in living cells. This coincidence argues  
511 that the determinants of corona assembly, after excluding the unknown receptor site in the  
512 kinetochore, are entirely contained with the RZZS complex. Thus, the RZZS emerges from our  
513 study as being sufficient to assemble the corona. This conclusion also explains why depletion of  
514 additional corona components, including CENP-E, CENP-F, DD, and MAD1-MAD2, does not  
515 visibly disrupt corona assembly and RZZ kinetochore recruitment (Allan et al., 2020; Ciossani et  
516 al., 2018; Gassmann et al., 2010). These proteins, on the other hand, may retain residual  
517 kinetochore localization even after depletion of RZZS components. The MAD1-MAD2 complex,  
518 for instance, requires the RZZ complex for kinetochore localization, and will localize to the  
519 kinetochore even if the corona cannot expand due to Spindly depletion (Rodriguez-Rodriguez et  
520 al., 2018). In another example, CENP-E and CENP-F, in addition to interacting with the corona,  
521 have also been shown to interact with the non-corona components BUBR1 and BUB1,  
522 respectively (Ciossani et al., 2018; Legal et al., 2020; Raaijmakers et al., 2018). We anticipate that  
523 our corona assembly assay may shed light on the mechanism of recruitment of these additional  
524 corona components.

525 A fundamental unresolved question in kinetochore biology is how the conversion of microtubule  
526 attachments from lateral to end-on promotes corona stripping. Plausibly, this sudden transition  
527 reflects a weakening of the interaction of the RZZS with its kinetochore receptor, leading to DD-  
528 directed detachment of the corona from the kinetochore. What triggers this change in binding  
529 affinity, however, remains unclear. Our studies, by unveiling the molecular features of the RZZ



530 complex and by defining requirements for its physical interactions, provide an initial step towards  
531 the elucidation of this very complex and important question.

532

### 533 **Acknowledgments**

534 We are grateful to Oliver Hofnagel and Daniel Prumbaum for help in EM data collection, and to  
535 the Musacchio and Raunser laboratories for helpful discussion. This work was supported by the  
536 Max Planck Society (to A.M. and S.R.). A.M. acknowledges funding by the Marie-Curie Training  
537 Network DivIDE (project number 675737), European Research Council (ERC) through Synergy  
538 Grant 951439 (BIOMECHANET), the Deutsche Forschungsgemeinschaft (DFG, German  
539 Research Foundation) through SFB1430 (Project-ID 424228829). Density maps of RZZ will be  
540 deposited into EMDB upon publication. Coordinates of the RZZ complex will be deposited to  
541 the PDB upon publication. The authors declare no competing financial interests.

542

### 543 **Author contributions (following CRediT model)**

544 **Conceptualization:** Andrea Musacchio

545 **Data curation:** N/A

546 **Formal analysis:** Tobias Raisch, Ingrid Vetter, Felipe Merino

547 **Funding acquisition:** Andrea Musacchio, Stefan Raunser

548 **Investigation:** Verena Cmentowski, Giuseppe Ciossani, Ennio d'Amico, Tobias Raisch

549 **Project Administration:** Andrea Musacchio, Stefan Raunser

550 **Resources:** Sara Carmignani, Stefano Maffini, Sabine Wohlgemuth

551 **Supervision:** Stefano Maffini, Andrea Musacchio, Stefan Raunser, Ingrid Vetter

552 **Validation:** Andrea Musacchio, Stefan Raunser, Ingrid Vetter

553 **Visualization:** Verena Cmentowski, Giuseppe Ciossani, Ennio d'Amico, Andrea Musacchio,  
554 Tobias Raisch, Ingrid Vetter

555 **Writing – original draft:** Andrea Musacchio

556 **Writing – review & editing:** Sara Carmignani, Giuseppe Ciossani, Verena Cmentowski, Ennio  
557 d'Amico, Stefano Maffini, Felipe Merino, Andrea Musacchio, Tobias Raisch, Stefan Raunser,  
558 Ingrid Vetter

559

## 560 **Materials and Methods**

561 ***Protein expression and purification*** Expression and purification of Spindly and RZZ constructs  
562 were carried out essentially as previously described (Moslaganti et al., 2017; Sacristan et al., 2018).  
563 Proteins were expressed using the BiGBac recombinant expression system (Weissmann et al.,  
564 2016). Bacmid was produced from EMBacY cells and used to transfect Sf9 cells to produce  
565 baculovirus. The baculovirus was subjected to three rounds of amplification, and used to infect  
566 TnaO38 cells. Cells were cultured for 72 hours before harvesting. A pellet from expression in 500  
567 ml of TnaO38 cells was lysed by sonication in 100 ml lysis buffer (50 mM HEPES pH 8.0, 250  
568 mM NaCl, 2 mM TCEP, 50 mM imidazole) supplemented with 1 mM PMSF and protease  
569 inhibitor cocktail (Serva). The lysate was then cleared by centrifugation at 100000 g for 45 minutes.  
570 The cleared lysate was loaded onto a HisPrep Fast Flow column (Cytiva) pre-equilibrated in lysis  
571 buffer, and washed with 500 ml lysis buffer, after which the bound protein was eluted with lysis  
572 buffer supplemented with 300 mM imidazole. The eluate was diluted 1:5 in Buffer A (50 mM  
573 HEPES pH 8.0, 2 mM TCEP), and applied to a 6 ml Resource Q anion exchange column (Cytiva).  
574 The protein was then eluted using a 50 mM to 500 mM NaCl gradient. Peak fractions were  
575 analyzed by SDS-PAGE, and those containing the relevant proteins were concentrated to 500  $\mu$ l  
576 volume, and subjected to size-exclusion chromatography on a Superdex S200 10/300 column  
577 (Cytiva) for Spindly, and on a Superose 6 10/300 for RZZ constructs, equilibrated in SEC buffer  
578 (50 mM HEPES pH 8.0, 250 mM NaCl, 2 mM TCEP). Fractions were pooled and concentrated  
579 to 10 mg/ml, snap-frozen, and stored at -80 °C until use. For dephosphorylation, 4  $\mu$ M <sup>mCh</sup>RZZS<sup>F</sup>  
580 complex or pre-formed MPS1-induced <sup>mCh</sup>RZZS<sup>F</sup> polymers were incubated for 15 hours in M-  
581 buffer at 20°C with or without 0.4 mg/ml Lambda phosphatase (produced in house), in presence  
582 of 10  $\mu$ M reversine.

583 Spindly <sup>$\Delta$ 276-306</sup> was expressed as an mCherry fusion in E. coli. BL21 CodonPlus cells were  
584 transformed with a pET28a plasmid containing the coding sequence for the mCherry tag, a  
585 PreScission cleavage sequence, and Spindly <sup>$\Delta$ 276-306</sup>, and grown in TB at 37°C to an OD<sub>600</sub> of 0.5.  
586 Expression was induced with 0.4 mM IPTG. The culture was then transferred into an incubator  
587 pre-cooled to 18° C, and grown overnight before harvesting. The pellet was then snap-frozen and  
588 stored at -80° C until purification. Untagged Spindly <sup>$\Delta$ 276-306</sup> was obtained by cleaving the mCherry  
589 tag with PreScission protease, by incubating 2 mg of mCherry-Spindly <sup>$\Delta$ 276-306</sup> with 0.1 mg of in-  
590 house produced PreScission protease overnight. The sample was then loaded on a Superose 6

591 column equilibrated in SEC buffer to remove the tag and PreScission protease. Fractions were  
592 then pooled and concentrated to 10 mg/ml, snap-frozen, and stored at -80° C until use.

593

594 ***Production of MPS1 kinase*** An mCherry-MPS1-6His construct was generated by sub-cloning in  
595 a pLIB vector. The corresponding baculovirus was generated in Sf9 insect cells (Wickham et al.,  
596 1992). After three rounds of amplification (V0, V1, and V2, 4 days each), 100 ml of V2 were  
597 inoculated in 1 liter of Tnao38 cells. 24 hours after infection for expression, reversine (Santaguida  
598 et al., 2010) was added to the growth medium (1  $\mu$ M) to maximize expression yields. After 60  
599 hours of expression at 27°C, cells were pelleted, washed in PBS, pelleted again and either stored  
600 at -80°C after flash-freezing in liquid nitrogen, or used directly for purification. Every purification  
601 step was performed on ice or at 4°C. The pellet was resuspended in ~100 ml buffer A (300 mM  
602 NaCl, 50 mM Hepes pH 8, 5% Glycerol, 2 mM TCEP, 10 mM Imidazole pH 8) and supplemented  
603 with PMSF (1:100), protease-inhibitor mix HP Plus (1:500, Serva) and DNaseI (1:300, Roche),  
604 lysed by sonication and cleared by centrifugation at 108000g for 45 min. The cleared lysate was  
605 applied to 5 ml Nickel-NTA (GE Healthcare) slurry beads previously equilibrated in buffer A and  
606 incubated on a rotating platform at 4°C for 2 hours. The supernatant was removed by  
607 centrifugation (1500g, 5 min, 4°C) and the beads were washed with 100 ml buffer A. For the  
608 elution, the beads were incubated (~15 min at 4°C) in 15 ml of buffer A supplemented with 300  
609 mM Imidazole pH 8. Samples of the cleared lysate, of the supernatant, and of the elution were  
610 loaded on SDS-page for analysis. The 15 ml elution was then concentrated, spun at max speed for  
611 30 min in a bench-top centrifuge (at 4°C) and finally loaded on a Superdex200 16/60 (GE  
612 Healthcare) previously equilibrated in MPS1 buffer (250 mM NaCl, 50 mM Hepes pH 8, 5%  
613 glycerol, 2 mM TCEP). The protein was then concentrated, aliquoted and stored in -80°C after  
614 flash-freezing in liquid nitrogen.

615

616 ***In vitro farnesylation*** Farnesyltransferase  $\alpha/\beta$  mutant (W102T/Y154T) was expressed and  
617 purified as previously described (Mosalaganti et al., 2017). Spindly was diluted to 100  $\mu$ M in  
618 farnesylation buffer (50 mM HEPES pH 8.0, 250 mM NaCl, 10 mM MgCl<sub>2</sub>, 2 mM TCEP), and  
619 farnesyltransferase was added to a final concentration of 30  $\mu$ M. Farnesyl pyrophosphate (Sigma-  
620 Aldrich) was added stepwise to a final concentration of 300  $\mu$ M. The reaction mixture was  
621 incubated at RT for 6 hours, after which it was centrifuged at 16,000 g for 10 minutes to remove  
622 precipitate that formed during the reaction. The cleared reaction mixture was then loaded on a  
623 Superose 6 column equilibrated in SEC buffer to remove the farnesyltransferase. The fractions

624 containing Spindly were identified by SDS-PAGE and pooled, concentrated to a final  
625 concentration of around 5 mg/ml, snap-frozen, and stored at -80 °C until use.

626

627 **Analytical size-exclusion chromatography** Analytical gel filtration runs were performed on  
628 Superose 6 Increase 5/150 columns (Cytiva) pre-equilibrated in SEC buffer. For runs with pre-  
629 farnesylated Spindly, RZZ and Spindly were pre-incubated at a concentration of 2  $\mu$ M and 6  $\mu$ M  
630 respectively on ice for 1 h in SEC buffer. For runs with concurrent farnesylation, RZZ, Spindly,  
631 and FTase were incubated at a concentration of 5  $\mu$ M, 15  $\mu$ M and 7.5  $\mu$ M respectively for 2 h at  
632 room temperature in SEC buffer supplemented with 25  $\mu$ M FPP, followed by 30 min on ice.

633

634 **Filamentation experiments with RZZS or RZZ complexes** Heat-induced RZZS<sup>F</sup> filaments were  
635 prepared by incubating 4  $\mu$ M RZZ complex and 8  $\mu$ M Spindly<sup>F</sup> or 4  $\mu$ M preassembled RZZS<sup>F</sup>  
636 complex for 1 h at 30°C in H-buffer (50 mM Hepes pH 7.5, 100 mM NaCl, 1 mM MgCl<sub>2</sub> and 1  
637 mM TCEP). Tags were removed from <sup>mCherry</sup>RZZ<sup>GFP</sup>S<sup>F</sup> filaments by incubating the polymers for 1  
638 hour at 30°C with 0.5 mg/ml Precission protease (produced in house). MPS1-induced filaments  
639 were obtained by incubating 4  $\mu$ M RZZ complex and 8  $\mu$ M Spindly<sup>F</sup> or 4  $\mu$ M RZZS<sup>F</sup> preassembled  
640 purified complex for 15 hours at 20°C in M-buffer (50 mM Hepes pH 7.5, 100 mM NaCl, 1 mM  
641 MgCl<sub>2</sub> and 1 mM TCEP), supplemented with 2 mM ATP at pH 8.0 and in presence of 1  $\mu$ M MPS1.  
642 The effect of other mitotic kinases on RZZS<sup>F</sup> complex filamentation was tested in the same  
643 conditions using 1  $\mu$ M of purified protein kinase (produced in house). Reversine (Calbiochem) was  
644 dissolved at 10 mM in DMSO and used at 10  $\mu$ M final concentration. Protein phosphorylation  
645 was monitored by ProQ Diamond phosphostaining (ThermoFisher Scientific) after SDS-PAGE  
646 separation. Independent MPS1 phosphorylation of RZZ and Spindly<sup>F</sup> protein stocks was carried  
647 out by incubating 8  $\mu$ M RZZ and 16  $\mu$ M Spindly<sup>F</sup> overnight in M-buffer at 20°C, supplemented  
648 with 2 mM ATP pH 8.0 and 1  $\mu$ M MPS1.

649

650 **Confocal imaging of RZZS<sup>F</sup> filaments** Glass flow chambers of about 10  $\mu$ l volume were assembled  
651 using standard cover glasses and glass slides, held together by double-side tape (Teva). Heat- or  
652 MPS1-induced RZZS<sup>F</sup> filaments were diluted to 0.5  $\mu$ M in H- or M- buffer (see above),  
653 respectively, and imaged in the glass chambers, at room temperature using a spinning disk confocal  
654 device on the 3i Marianas system at 63X magnification. Sample images were acquired as 5-stacks  
655 of z-sections at 0.27  $\mu$ m, converted into maximal intensity projections, exported and processed  
656 with Fiji (Schindelin et al., 2012).

657

658 ***Cell culture, plasmid transfection, microinjections and imaging*** Cell culture and drug treatment:

659 HeLa and DLD-1 cells were grown in Dulbecco's Modified Eagle's Medium (DMEM; PAN  
660 Biotech) supplemented with 10 % tetracycline-free FBS (PAN Biotech), and L-glutamine (PAN  
661 Biotech). Cells were grown at 37°C in the presence of 5 % CO<sub>2</sub>. Where indicated, nocodazole  
662 (Sigma) was used at 3.3 μM, RO3306 (Calbiochem) at 9 μM, MG-132 (Calbiochem) at 10 μM,  
663 hesperadin at 500 nM (Merck), and reversine (Cayman Chem.) at 500 nM. Cell transfection and  
664 electroporation: Depletion of endogenous Spindly was achieved through reverse transfection with  
665 50 nM Spindly siRNA (5'-GAAAGGGUCUCAACUGAA-3' obtained from Sigma-Aldrich) for  
666 48 hours with RNAiMAX (Invitrogen, Carlsbad, California, United States). For rescue  
667 experiments, 24 hours after Spindly depletion, we electroporated recombinant Spindly constructs,  
668 either unlabeled or labeled with an N-terminal mCherry, at a concentration of 7 μM in the  
669 electroporation slurry (as previously described in Alex et al., 2019) (Neon Transfection System,  
670 Thermo Fisher). Control cells were electroporated with mCherry or electroporation buffer,  
671 respectively. Following an 8 hours recovery, cells were treated with 9 μM RO3306 (Calbiochem)  
672 for 15 hours. Subsequently, cells were released into mitosis in presence of 3.3 μM nocodazole  
673 (Sigma) for 1 hour. Immunofluorescence: Cells were grown on coverslips pre-coated with Poly-L-  
674 lysine (Sigma-Aldrich). Cells were pre-permealized with 0.5% Triton X-100 solution in PHEM  
675 (Pipes, HEPES, EGTA, MgCl<sub>2</sub>) buffer supplemented with 100 nM Microcystin for 5 minutes  
676 before fixation with 4% PFA in PHEM for 20 minutes. After blocking with 5% boiled goat serum  
677 (BGS) in PHEM buffer, cells were incubated for 2 hours at room temperature with the following  
678 primary antibodies: BUB1 (mouse, Abcam, ab54893, 1:400), CENP-E (mouse, Abcam, ab5093,  
679 1:200), Spindly (rabbit, Bethyl, A301-354A, 1:1000), Zwilch (rabbit, made in-house, SI520, 1:900),  
680 CREST/anti-centromere antibodies (Antibodies, Inc., 1:200) diluted in 2.5 % BGS-PHEM  
681 supplemented with 0.1% Triton-X100. Subsequently, cells were incubated for 1 hour at room  
682 temperature with the following secondary antibodies: Goat anti-mouse Alexa Fluor 488  
683 (Invitrogen A A11001), donkey anti-rabbit Rhodamine Red (Jackson Immuno Research 711-295-  
684 152), donkey anti-rabbit Alexa Fluor 488 (Invitrogen A21206), goat anti-human Alexa Fluor 647  
685 (Invitrogen, Carlsbad, California, United States). All washing steps were performed with PHEM-  
686 T buffer. DNA was stained with 0.5 μg/ml DAPI (Serva) and Mowiol (Calbiochem) was used as  
687 mounting media. Cell imaging: Cells were imaged at room temperature using a spinning disk  
688 confocal device on the 3i Marianas system equipped with an Axio Observer Z1 microscope (Zeiss),  
689 a CSU-X1 confocal scanner unit (Yokogawa Electric Corporation, Tokyo, Japan), 100 × /1.4NA  
690 Oil Objectives (Zeiss), and Orca Flash 4.0 sCMOS Camera (Hamamatsu). Images were acquired

691 as z sections at 0.27  $\mu\text{m}$ . Images were converted into maximal intensity projections, exported, and  
692 converted into 8-bit tiff files. Automatic quantification of single kinetochore signals was performed  
693 using the software Fiji with background subtraction. Measurements were exported in Excel  
694 (Microsoft) and graphed with GraphPad Prism 9.0 (GraphPad Software). The figures were  
695 arranged using Adobe Illustrator 2022 software.

696

697 ***Negative stain electron microscopy sample preparation and image analysis*** 4  $\mu\text{l}$  of 20-100 nM  
698 RZZS<sup>F</sup> filaments were deposited on freshly glow-discharged Formvar/Carbon (Quantifoil) film  
699 supported copper grid Cu400 (Sigma Aldrich) and incubated for 1 min. Once removal of the  
700 excess of sample was blotted away with filter paper, the grids were washed two times with 10  $\mu\text{l}$   
701 of H- or M-buffer (Heat- or Mps1-induced filaments, respectively), then once with 10  $\mu\text{l}$  of 0.75%  
702 (w/v) uranyl formate (Sigma Aldrich). After staining with 10  $\mu\text{l}$  of 0.75% (w/v) uranyl formate for  
703 30 sec, grids were blotted, dried and visualized at 120 kV using a Tecnai Spirit equipped with a  
704 LaB<sub>6</sub> cathode and a 4000  $\times$  4000 CMOS detector F416 (TVIPS). Images were recorded at a  
705 nominal magnification of 21-42,000x. Single measurements of the diameter of RZZS<sup>F</sup> circular  
706 polymers were performed by processing negative stain EM images with Fiji (NIH). Values were  
707 exported in Excel (Microsoft) and graphed with GraphPad Prism 6.0 (GraphPad Software). 2D  
708 classification of <sup>mCh</sup>RZZ<sup>GFP</sup>S<sup>F</sup> filaments was performed using ISAC (Yang et al., 2012) within  
709 SPHIRE (Moriya et al., 2017). 148 images were collected at a magnification of 42000x resulting in  
710 2.6  $\text{\AA}/\text{pix}$ . Straight filament sections were manually selected, and segments of 256x256 px and an  
711 overlap of 115 px were extracted from those, resulting in 2730 particles. Classification was  
712 performed with standard parameters, using a radius of 120 px and a maximum of 50 members per  
713 class.

714

715 ***Cryo-EM grid preparation and data acquisition*** Grids were prepared using a Vitrobot Mark IV  
716 (Thermo Fisher Scientific) at 13  $^{\circ}\text{C}$  and 100 % humidity. 4  $\mu\text{l}$  of RZZ at a concentration of 5  
717 mg/ml and supplemented with 0.02 % Triton were applied to glow-discharged Quantifoil R2/1  
718 grids and excess liquid removed by blotting (3.5 seconds at blot force -3) before vitrification in  
719 liquid ethane. Cryo-EM data were acquired on a Titan Krios electron microscope (Thermo Fisher  
720 Scientific) equipped with a field emission gun. Two datasets with 1968 and 5794 movies,  
721 respectively, were recorded on a K3 camera (Gatan) operated in super-resolution mode at a  
722 nominal magnification of 105,000, resulting in a super-resolution pixel size of 0.45  $\text{\AA}$ . A  
723 Bioquantum post-column energy filter (Gatan) was used for zero-loss filtration with an energy

724 width of 15 eV. Total electron exposure of 59 and 60 e-/Å<sup>2</sup>, respectively, was distributed over 60  
725 frames. Data were collected using the automated data collection software EPU (Thermo Fisher  
726 Scientific), with three exposures per hole and a set defocus range of -1.2 to -2.7 μm. Details of  
727 data acquisition parameters can be found in [Supplementary Table 1](#).

728

729 ***Cryo-EM data processing*** On-the-fly data pre-processing, including correction of beam-induced  
730 motion and dose-weighting by MotionCor2 (Zheng et al., 2017), CTF parameter estimation using  
731 CTFFIND4 in movie mode (Rohou and Grigorieff, 2015), and particle picking using a custom  
732 neural network in SPHIRE-crYOLO (Wagner et al., 2019), was performed within TranSPHIRE  
733 (Stabrin et al., 2020). 74,836 four-fold binned particles with dimensions of 180x180 pixels were  
734 extracted from the first dataset using SPHIRE (Moriya et al., 2017), and used for 2D classification  
735 in ISAC. An initial model was calculated in RVIPER using 81 good 2D classes and by imposing  
736 C2 symmetry. Initial 3D reconstruction in MERIDIEN was performed using 49,656 two-fold  
737 binned particles of the second dataset which were assigned to well-defined 2D classes and also  
738 with imposed C2 symmetry, resulting in a 4.7 Å 3D reconstruction. Recentered particles from all  
739 micrographs of the second dataset were used for training an improved neural network for  
740 SPHIRE-crYOLO. 191,979 particles were picked with this network on 7,718 micrographs of both  
741 datasets and extracted with two-fold binning and a size of 300x300 pixels. An initial 3D refinement  
742 of this particle stack in RELION (Zivanov et al., 2019) resulted in a 4.9 Å reconstruction. After  
743 several rounds of particle polishing and CTF refinement in RELION, reconstructions with overall  
744 nominal resolutions of 4.1 Å and 3.9 Å were obtained using 3D refinement in RELION or non-  
745 uniform refinement in cryoSPARC (Punjani et al., 2017; Punjani et al., 2020), respectively ([Figure](#)  
746 [1 – Supplement 1A-B](#)). Local resolution was calculated, and the reconstruction locally filtered,  
747 using cryoSPARC ([Figure 1 – Supplement 1C](#)). As the global reconstructions displayed a strong  
748 resolution gradient from the center to the exterior parts of the molecule ([Figure 1 – Supplement](#)  
749 [1C](#)), indicative of continuous flexibility within the complex, we turned to a focused refinement  
750 strategy. For this, we generated two focused masks, one for the central and one for the exterior  
751 part of one asymmetric half of the molecule. Then, we symmetry-expanded the particle stack  
752 according to the C2 symmetry and performed focused local refinements in cryoSPARC that  
753 resulted in reconstructions of 3.7 Å and 4.8 Å, respectively, for the central and the exterior masks  
754 ([Figure 1 – Supplement 1A](#)). The maps were fitted to the original unmasked C2-symmetric map,  
755 and a composite map created using the ‘vop maximum’ command in Chimera (Pettersen et al.,  
756 2004).

757

758 ***Model building, validation, fitting*** The central part of RZZ was built de novo using the 3.9 Å  
759 reconstruction from cryoSPARC non-uniform refinement. This map was subjected to automated  
760 model building using phenix.map\_to\_model (Liebschner et al., 2019). The resulting initial model,  
761 which comprised many  $\alpha$ -helices in the central part of the particle, was manually improved and  
762 extended and the correct sequence assigned in Coot (Emsley et al., 2010), yielding a model  
763 comprising almost full-length ZW10 and the central part of Rod (residues 890-1440). AlphaFold2  
764 (AF2) (Jumper et al., 2021; Tunyasuvunakool et al., 2021) was used in the original implementation  
765 as well as in the modified "ColabFold" (Mirdita et al., 2021) and in the "multimer" versions (Evans  
766 et al., 2021) to model subcomplexes of RZZ, specifically, the central region of ROD with ZW10,  
767 the "hook"-region consisting of the N- and C-termini of two different ROD molecules, the ROD  
768  $\beta$ -propeller-Zwilch complex and the ROD  $\beta$ -propeller complex with the C-terminus of Spindly.  
769 The overlapping subcomplexes were superimposed, rigid-body-fitted to the RZZ electron density  
770 map, and then manually optimized. Flexible dynamic molecular dynamics fitting (Kidmose et al.,  
771 2019) and PHENIX real space refinement (Afonine et al., 2013) was employed to refine the fit  
772 and optimize the model geometries. In almost all regions, the AF2 predictions explained the  
773 electron density map very well after minor alterations, but the choice of the lengths of the  
774 interacting fragments of ROD was important, as e.g. the termini of full length ROD are predicted  
775 to interact with themselves since the second ROD molecule is missing, and a prediction of the  
776 dimeric full length complex was not successful.



777 **References**

- 778 Afonine, P.V., R.W. Grosse-Kunstleve, P.D. Adams, and A. Urzhumtsev. 2013. Bulk-solvent and  
779 overall scaling revisited: faster calculations, improved results. *Acta Crystallogr D Biol*  
780 *Crystallogr.* 69:625-634.
- 781 Alfieri, C., S. Zhang, and D. Barford. 2017. Visualizing the complex functions and mechanisms of  
782 the anaphase promoting complex/cyclosome (APC/C). *Open biology.* 7.
- 783 Allan, L.A., M. Camacho Reis, G. Ciossani, P.J. Huis In 't Veld, S. Wohlgemuth, G.J. Kops, A.  
784 Musacchio, and A.T. Saurin. 2020. Cyclin B1 scaffolds MAD1 at the kinetochore corona  
785 to activate the mitotic checkpoint. *The EMBO journal.* 39:e103180.
- 786 Altenfeld, A., S. Wohlgemuth, A. Wehenkel, I.R. Vetter, and A. Musacchio. 2015. Complex  
787 assembly, crystallization and preliminary X-ray crystallographic analysis of the human Rod-  
788 Zwilch-ZW10 (RZZ) complex. *Acta Crystallogr F Struct Biol Commun.* 71:438-442.
- 789 Arakel, E.C., and B. Schwappach. 2018. Formation of COPI-coated vesicles at a glance. *Journal of*  
790 *cell science.* 131.
- 791 Auckland, P., E. Roscioli, H.L.E. Coker, and A.D. McAinsh. 2020. CENP-F stabilizes  
792 kinetochore-microtubule attachments and limits dynein stripping of corona cargoes. *The*  
793 *Journal of cell biology.* 219.
- 794 Barbosa, J., T. Martins, T. Bange, L. Tao, C. Conde, and C. Sunkel. 2020. Polo regulates Spindly  
795 to prevent premature stabilization of kinetochore-microtubule attachments. *The EMBO*  
796 *journal.* 39:e100789.
- 797 Barisic, M., B. Sohm, P. Mikolcevic, C. Wandke, V. Rauch, T. Ringer, M. Hess, G. Bonn, and S.  
798 Geley. 2010. Spindly/CCDC99 is required for efficient chromosome congression and  
799 mitotic checkpoint regulation. *Molecular biology of the cell.* 21:1968-1981.
- 800 Basto, R., R. Gomes, and R.E. Karess. 2000. Rough deal and Zw10 are required for the metaphase  
801 checkpoint in *Drosophila*. *Nature cell biology.* 2:939-943.
- 802 Basto, R., F. Scaerou, S. Mische, E. Wojcik, C. Lefebvre, R. Gomes, T. Hays, and R. Karess. 2004.  
803 In vivo dynamics of the rough deal checkpoint protein during *Drosophila* mitosis. *Current*  
804 *biology : CB.* 14:56-61.
- 805 Brohawn, S.G., N.C. Leksa, E.D. Spear, K.R. Rajashankar, and T.U. Schwartz. 2008. Structural  
806 evidence for common ancestry of the nuclear pore complex and vesicle coats. *Science.*  
807 322:1369-1373.
- 808 Buffin, E., C. Lefebvre, J. Huang, M.E. Gagou, and R.E. Karess. 2005. Recruitment of Mad2 to  
809 the kinetochore requires the Rod/Zw10 complex. *Current biology : CB.* 15:856-861.

- 810 Caldas, G.V., T.R. Lynch, R. Anderson, S. Afreen, D. Varma, and J.G. DeLuca. 2015. The RZZ  
811 complex requires the N-terminus of KNL1 to mediate optimal Mad1 kinetochore  
812 localization in human cells. *Open biology*. 5.
- 813 Chan, Y.W., L.L. Fava, A. Uldschmid, M.H. Schmitz, D.W. Gerlich, E.A. Nigg, and A. Santamaria.  
814 2009. Mitotic control of kinetochore-associated dynein and spindle orientation by human  
815 Spindly. *The Journal of cell biology*. 185:859-874.
- 816 Cheerambathur, D.K., R. Gassmann, B. Cook, K. Oegema, and A. Desai. 2013. Crosstalk between  
817 microtubule attachment complexes ensures accurate chromosome segregation. *Science*.  
818 342:1239-1242.
- 819 Cianfrocco, M.A., M.E. DeSantis, A.E. Leschziner, and S.L. Reck-Peterson. 2015. Mechanism and  
820 regulation of cytoplasmic dynein. *Annu Rev Cell Dev Biol*. 31:83-108.
- 821 Ciossani, G., K. Overlack, A. Petrovic, P.J. Huis In 't Veld, C. Koerner, S. Wohlgemuth, S. Maffini,  
822 and A. Musacchio. 2018. The kinetochore proteins CENP-E and CENP-F directly and  
823 specifically interact with distinct BUB mitotic checkpoint Ser/Thr kinases. *The Journal of*  
824 *biological chemistry*. 293:10084-10101.
- 825 Civril, F., A. Wehenkel, F.M. Giorgi, S. Santaguida, A. Di Fonzo, G. Grigorean, F.D. Ciccarelli,  
826 and A. Musacchio. 2010. Structural analysis of the RZZ complex reveals common ancestry  
827 with multisubunit vesicle tethering machinery. *Structure*. 18:616-626.
- 828 Cooke, C.A., B. Schaar, T.J. Yen, and W.C. Earnshaw. 1997. Localization of CENP-E in the  
829 fibrous corona and outer plate of mammalian kinetochores from prometaphase through  
830 anaphase. *Chromosoma*. 106:446-455.
- 831 De Antoni, A., C.G. Pearson, D. Cimini, J.C. Canman, V. Sala, L. Nezi, M. Mapelli, L. Sironi, M.  
832 Faretta, E.D. Salmon, and A. Musacchio. 2005. The Mad1/Mad2 complex as a template  
833 for Mad2 activation in the spindle assembly checkpoint. *Current biology : CB*. 15:214-225.
- 834 Emsley, P., B. Lohkamp, W.G. Scott, and K. Cowtan. 2010. Features and development of Coot.  
835 *Acta Crystallogr D Biol Crystallogr*. 66:486-501.
- 836 Evans, R., M. O'Neill, A. Pritzel, N. Antropova, A. Senior, T. Green, A. Židek, R. Bates, S.  
837 Blackwell, J. Yim, O. Ronneberger, S. Bodenstern, M. Zielinski, A. Bridgland, A.  
838 Potapenko, A. Cowie, K. Tunyasuvunakool, R. Jain, E. Clancy, P. Kohli, J. Jumper, and H.  
839 D. 2021. Protein complex prediction with AlphaFold-Multimer. *BioRxiv*.
- 840 Faesen, A.C., M. Thanasoula, S. Maffini, C. Breit, F. Muller, S. van Gerwen, T. Bange, and A.  
841 Musacchio. 2017. Basis of catalytic assembly of the mitotic checkpoint complex. *Nature*.  
842 542:498-502.
- 843 Fath, S., J.D. Mancias, X. Bi, and J. Goldberg. 2007. Structure and organization of coat proteins  
844 in the COPII cage. *Cell*. 129:1325-1336.

- 845 Fava, L.L., M. Kaulich, E.A. Nigg, and A. Santamaria. 2011. Probing the in vivo function of  
846 Mad1:C-Mad2 in the spindle assembly checkpoint. *The EMBO journal*. 30:3322-3336.
- 847 Fotin, A., Y. Cheng, P. Sliz, N. Grigorieff, S.C. Harrison, T. Kirchhausen, and T. Walz. 2004.  
848 Molecular model for a complete clathrin lattice from electron cryomicroscopy. *Nature*.  
849 432:573-579.
- 850 Gama, J.B., C. Pereira, P.A. Simoes, R. Celestino, R.M. Reis, D.J. Barbosa, H.R. Pires, C. Carvalho,  
851 J. Amorim, A.X. Carvalho, D.K. Cheerambathur, and R. Gassmann. 2017. Molecular  
852 mechanism of dynein recruitment to kinetochores by the Rod-Zw10-Zwilch complex and  
853 Spindly. *The Journal of cell biology*. 216:943-960.
- 854 Gassmann, R., A. Essex, J.S. Hu, P.S. Maddox, F. Motegi, A. Sugimoto, S.M. O'Rourke, B.  
855 Bowerman, I. McLeod, J.R. Yates, 3rd, K. Oegema, I.M. Cheeseman, and A. Desai. 2008.  
856 A new mechanism controlling kinetochore-microtubule interactions revealed by  
857 comparison of two dynein-targeting components: SPDL-1 and the Rod/Zwilch/Zw10  
858 complex. *Genes & development*. 22:2385-2399.
- 859 Gassmann, R., A.J. Holland, D. Varma, X. Wan, F. Civril, D.W. Cleveland, K. Oegema, E.D.  
860 Salmon, and A. Desai. 2010. Removal of Spindly from microtubule-attached kinetochores  
861 controls spindle checkpoint silencing in human cells. *Genes & development*. 24:957-971.
- 862 Griffis, E.R., N. Stuurman, and R.D. Vale. 2007. Spindly, a novel protein essential for silencing  
863 the spindle assembly checkpoint, recruits dynein to the kinetochore. *The Journal of cell biology*.  
864 177:1005-1015.
- 865 Hauf, S., R.W. Cole, S. LaTerra, C. Zimmer, G. Schnapp, R. Walter, A. Heckel, J. van Meel, C.L.  
866 Rieder, and J.M. Peters. 2003. The small molecule Hesperadin reveals a role for Aurora B  
867 in correcting kinetochore-microtubule attachment and in maintaining the spindle assembly  
868 checkpoint. *The Journal of cell biology*. 161:281-294.
- 869 Henen, M.A., W. Myers, L.R. Schmitt, K.J. Wade, A. Born, P.J. Nichols, and B. Vogeli. 2021. The  
870 Disordered Spindly C-terminus Interacts with RZZ Subunits ROD-1 and ZWL-1 in the  
871 Kinetochore through the Same Sites in *C. Elegans*. *J Mol Biol*. 433:166812.
- 872 Hoffman, D.B., C.G. Pearson, T.J. Yen, B.J. Howell, and E.D. Salmon. 2001. Microtubule-  
873 dependent changes in assembly of microtubule motor proteins and mitotic spindle  
874 checkpoint proteins at PtK1 kinetochores. *Molecular biology of the cell*. 12:1995-2009.
- 875 Holland, A.J., R.M. Reis, S. Niessen, C. Pereira, D.A. Andres, H.P. Spielmann, D.W. Cleveland, A.  
876 Desai, and R. Gassmann. 2015. Preventing farnesylation of the dynein adaptor Spindly  
877 contributes to the mitotic defects caused by farnesyltransferase inhibitors. *Molecular biology  
878 of the cell*. 26:1845-1856.
- 879 Hoogenraad, C.C., and A. Akhmanova. 2016. Bicaudal D Family of Motor Adaptors: Linking  
880 Dynein Motility to Cargo Binding. *Trends Cell Biol*. 26:327-340.

- 881 Howell, B.J., B.F. McEwen, J.C. Canman, D.B. Hoffman, E.M. Farrar, C.L. Rieder, and E.D.  
882 Salmon. 2001. Cytoplasmic dynein/dynactin drives kinetochore protein transport to the  
883 spindle poles and has a role in mitotic spindle checkpoint inactivation. *The Journal of cell*  
884 *biology*. 155:1159-1172.
- 885 Jackman, M., C. Marozzi, M. Barbiero, M. Pardo, L. Yu, A.L. Tyson, J.S. Choudhary, and J. Pines.  
886 2020. Cyclin B1-Cdk1 facilitates MAD1 release from the nuclear pore to ensure a robust  
887 spindle checkpoint. *The Journal of cell biology*. 219.
- 888 Jokelainen, P.T. 1967. The ultrastructure and spatial organization of the metaphase kinetochore in  
889 mitotic rat cells. *J Ultrastruct Res*. 19:19-44.
- 890 Jumper, J., R. Evans, A. Pritzel, T. Green, M. Figurnov, O. Ronneberger, K. Tunyasuvunakool, R.  
891 Bates, A. Zidek, A. Potapenko, A. Bridgland, C. Meyer, S.A.A. Kohl, A.J. Ballard, A. Cowie,  
892 B. Romera-Paredes, S. Nikolov, R. Jain, J. Adler, T. Back, S. Petersen, D. Reiman, E.  
893 Clancy, M. Zielinski, M. Steinegger, M. Pacholska, T. Berghammer, S. Bodenstein, D.  
894 Silver, O. Vinyals, A.W. Senior, K. Kavukcuoglu, P. Kohli, and D. Hassabis. 2021. Highly  
895 accurate protein structure prediction with AlphaFold. *Nature*. 596:583-589.
- 896 Karess, R. 2005. Rod-Zw10-Zwilch: a key player in the spindle checkpoint. *Trends Cell Biol*. 15:386-  
897 392.
- 898 Katoh, K., K. Misawa, K. Kuma, and T. Miyata. 2002. MAFFT: a novel method for rapid multiple  
899 sequence alignment based on fast Fourier transform. *Nucleic Acids Res*. 30:3059-3066.
- 900 Kidmose, R.T., J. Juhl, P. Nissen, T. Boesen, J.L. Karlsen, and B.P. Pedersen. 2019. Namdinator -  
901 automatic molecular dynamics flexible fitting of structural models into cryo-EM and  
902 crystallography experimental maps. *IUCrJ*. 6:526-531.
- 903 Kops, G., and R. Gassmann. 2020. Crowning the Kinetochore: The Fibrous Corona in  
904 Chromosome Segregation. *Trends Cell Biol*. 30:653-667.
- 905 Kops, G.J., Y. Kim, B.A. Weaver, Y. Mao, I. McLeod, J.R. Yates, 3rd, M. Tagaya, and D.W.  
906 Cleveland. 2005. ZW10 links mitotic checkpoint signaling to the structural kinetochore.  
907 *The Journal of cell biology*. 169:49-60.
- 908 Kuhn, J., and S. Dumont. 2017. Spindle assembly checkpoint satisfaction occurs via end-on but  
909 not lateral attachments under tension. *The Journal of cell biology*. 216:1533-1542.
- 910 Kuhn, J., and S. Dumont. 2019. Mammalian kinetochores count attached microtubules in a  
911 sensitive and switch-like manner. *The Journal of cell biology*. 218:3583-3596.
- 912 Kuijt, T.E.F., M.L.A. Lambers, S. Weterings, B. Ponsioen, A.C.F. Bolhaqueiro, D.H.M. Staijen,  
913 and G. Kops. 2020. A Biosensor for the Mitotic Kinase MPS1 Reveals Spatiotemporal  
914 Activity Dynamics and Regulation. *Current biology : CB*. 30:3862-3870 e3866.

- 915 Lara-Gonzalez, P., J. Pines, and A. Desai. 2021. Spindle assembly checkpoint activation and  
916 silencing at kinetochores. *Semin Cell Dev Biol.* 117:86-98.
- 917 Lee, C., and J. Goldberg. 2010. Structure of coatamer cage proteins and the relationship among  
918 COPI, COPII, and clathrin vesicle coats. *Cell.* 142:123-132.
- 919 Legal, T., D. Hayward, A. Gluszek-Kustusz, E.A. Blackburn, C. Spanos, J. Rappsilber, U.  
920 Gruneberg, and J.P.I. Welburn. 2020. The C-terminal helix of BubR1 is essential for  
921 CENP-E-dependent chromosome alignment. *Journal of cell science.* 133.
- 922 Liebschner, D., P.V. Afonine, M.L. Baker, G. Bunkoczi, V.B. Chen, T.I. Croll, B. Hintze, L.W.  
923 Hung, S. Jain, A.J. McCoy, N.W. Moriarty, R.D. Oeffner, B.K. Poon, M.G. Prisant, R.J.  
924 Read, J.S. Richardson, D.C. Richardson, M.D. Sammito, O.V. Sobolev, D.H. Stockwell,  
925 T.C. Terwilliger, A.G. Urzhumtsev, L.L. Videau, C.J. Williams, and P.D. Adams. 2019.  
926 Macromolecular structure determination using X-rays, neutrons and electrons: recent  
927 developments in Phenix. *Acta Crystallogr D Struct Biol.* 75:861-877.
- 928 Magidson, V., R. Paul, N. Yang, J.G. Ault, C.B. O'Connell, I. Tikhonenko, B.F. McEwen, A.  
929 Mogilner, and A. Khodjakov. 2015. Adaptive changes in the kinetochore architecture  
930 facilitate proper spindle assembly. *Nature cell biology.*
- 931 Matson, D.R., and P.T. Stukenberg. 2014. CENP-I and Aurora B act as a molecular switch that  
932 ties RZZ/Mad1 recruitment to kinetochore attachment status. *The Journal of cell biology.*  
933 205:541-554.
- 934 McEwen, B.F., J.T. Arena, J. Frank, and C.L. Rieder. 1993. Structure of the colcemid-treated PtK1  
935 kinetochore outer plate as determined by high voltage electron microscopic tomography.  
936 *The Journal of cell biology.* 120:301-312.
- 937 McKenney, R.J., W. Huynh, M.E. Tanenbaum, G. Bhabha, and R.D. Vale. 2014. Activation of  
938 cytoplasmic dynein motility by dynactin-cargo adapter complexes. *Science.* 345:337-341.
- 939 Miller, S.A., M.L. Johnson, and P.T. Stukenberg. 2008. Kinetochore attachments require an  
940 interaction between unstructured tails on microtubules and Ndc80(Hec1). *Current biology :  
941 CB.* 18:1785-1791.
- 942 Mirdita, M., K. Schütze, L. Moriqwaki, S. Ovchinnikov, and M. Steinegger. 2021. ColabFold -  
943 Making protein folding accessible to all. *BioRxiv.*
- 944 Mische, S., Y. He, L. Ma, M. Li, M. Serr, and T.S. Hays. 2008. Dynein light intermediate chain: an  
945 essential subunit that contributes to spindle checkpoint inactivation. *Molecular biology of the  
946 cell.* 19:4918-4929.
- 947 Moriya, T., M. Saur, M. Stabrin, F. Merino, H. Voicu, Z. Huang, P.A. Penczek, S. Raunser, and C.  
948 Gatsogiannis. 2017. High-resolution Single Particle Analysis from Electron Cryo-  
949 microscopy Images Using SPHIRE. *J Vis Exp.*

- 950 Mosalaganti, S., J. Keller, A. Altenfeld, M. Winzker, P. Rombaut, M. Saur, A. Petrovic, A.  
951 Wehenkel, S. Wohlgemuth, F. Muller, S. Maffini, T. Bange, F. Herzog, H. Waldmann, S.  
952 Raunser, and A. Musacchio. 2017. Structure of the RZZ complex and molecular basis of  
953 its interaction with Spindly. *The Journal of cell biology*. 216:961-981.
- 954 Moudgil, D.K., N. Westcott, J.K. Famulski, K. Patel, D. Macdonald, H. Hang, and G.K. Chan.  
955 2015. A novel role of farnesylation in targeting a mitotic checkpoint protein, human  
956 Spindly, to kinetochores. *The Journal of cell biology*. 208:881-896.
- 957 Musacchio, A., and A. Desai. 2017. A Molecular View of Kinetochores Assembly and Function.  
958 *Biology (Basel)*. 6.
- 959 Navarro, A.P., and I.M. Cheeseman. 2021. Kinetochores assembly throughout the cell cycle. *Semin*  
960 *Cell Dev Biol*. 117:62-74.
- 961 Nijenhuis, W., E. von Castelmur, D. Littler, V. De Marco, E. Tromer, M. Vleugel, M.H. van Osch,  
962 B. Snel, A. Perrakis, and G.J. Kops. 2013. A TPR domain-containing N-terminal module  
963 of MPS1 is required for its kinetochores localization by Aurora B. *The Journal of cell biology*.  
964 201:217-231.
- 965 Pagliuca, C., V.M. Draviam, E. Marco, P.K. Sorger, and P. De Wulf. 2009. Roles for the conserved  
966 spc105p/kre28p complex in kinetochores-microtubule binding and the spindle assembly  
967 checkpoint. *PLoS One*. 4:e7640.
- 968 Pereira, C., R.M. Reis, J.B. Gama, R. Celestino, D.K. Cheerambathur, A.X. Carvalho, and R.  
969 Gassmann. 2018. Self-Assembly of the RZZ Complex into Filaments Drives Kinetochores  
970 Expansion in the Absence of Microtubule Attachment. *Current biology : CB*. 28:3408-3421  
971 e3408.
- 972 Pettersen, E.F., T.D. Goddard, C.C. Huang, G.S. Couch, D.M. Greenblatt, E.C. Meng, and T.E.  
973 Ferrin. 2004. UCSF Chimera--a visualization system for exploratory research and analysis.  
974 *J Comput Chem*. 25:1605-1612.
- 975 Punjani, A., J.L. Rubinstein, D.J. Fleet, and M.A. Brubaker. 2017. cryoSPARC: algorithms for rapid  
976 unsupervised cryo-EM structure determination. *Nat Methods*. 14:290-296.
- 977 Punjani, A., H. Zhang, and D.J. Fleet. 2020. Non-uniform refinement: adaptive regularization  
978 improves single-particle cryo-EM reconstruction. *Nat Methods*. 17:1214-1221.
- 979 Raaijmakers, J.A., M.E. Tanenbaum, and R.H. Medema. 2013. Systematic dissection of dynein  
980 regulators in mitosis. *The Journal of cell biology*. 201:201-215.
- 981 Raaijmakers, J.A., R. van Heesbeen, V.A. Blomen, L.M.E. Janssen, F. van Diemen, T.R.  
982 Brummelkamp, and R.H. Medema. 2018. BUB1 Is Essential for the Viability of Human  
983 Cells in which the Spindle Assembly Checkpoint Is Compromised. *Cell Rep*. 22:1424-1438.

- 984 Reck-Peterson, S.L., W.B. Redwine, R.D. Vale, and A.P. Carter. 2018. The cytoplasmic dynein  
985 transport machinery and its many cargoes. *Nature reviews. Molecular cell biology*. 19:382-398.
- 986 Rieder, C.L., and S.P. Alexander. 1990. Kinetochores are transported poleward along a single astral  
987 microtubule during chromosome attachment to the spindle in newt lung cells. *The Journal*  
988 *of cell biology*. 110:81-95.
- 989 Rodriguez-Rodriguez, J.A., C. Lewis, K.L. McKinley, V. Sikirzhyski, J. Corona, J. Maciejowski, A.  
990 Khodjakov, I.M. Cheeseman, and P.V. Jallepalli. 2018. Distinct Roles of RZZ and Bub1-  
991 KNL1 in Mitotic Checkpoint Signaling and Kinetochore Expansion. *Current biology : CB*.  
992 28:3422-3429 e3425.
- 993 Rohou, A., and N. Grigorieff. 2015. CTFIND4: Fast and accurate defocus estimation from  
994 electron micrographs. *J Struct Biol*. 192:216-221.
- 995 Sacristan, C., M.U.D. Ahmad, J. Keller, J. Fermie, V. Groenewold, E. Tromer, A. Fish, R. Melero,  
996 J.M. Carazo, J. Klumperman, A. Musacchio, A. Perrakis, and G.J. Kops. 2018. Dynamic  
997 kinetochore size regulation promotes microtubule capture and chromosome biorientation  
998 in mitosis. *Nature cell biology*. 20:800-810.
- 999 Santaguida, S., A. Tighe, A.M. D'Alise, S.S. Taylor, and A. Musacchio. 2010. Dissecting the role of  
1000 MPS1 in chromosome biorientation and the spindle checkpoint through the small  
1001 molecule inhibitor reversine. *The Journal of cell biology*. 190:73-87.
- 1002 Scaerou, F., D.A. Starr, F. Piano, O. Papoulas, R.E. Karess, and M.L. Goldberg. 2001. The ZW10  
1003 and Rough Deal checkpoint proteins function together in a large, evolutionarily conserved  
1004 complex targeted to the kinetochore. *Journal of cell science*. 114:3103-3114.
- 1005 Schindelin, J., I. Arganda-Carreras, E. Frise, V. Kaynig, M. Longair, T. Pietzsch, S. Preibisch, C.  
1006 Rueden, S. Saalfeld, B. Schmid, J.Y. Tinevez, D.J. White, V. Hartenstein, K. Eliceiri, P.  
1007 Tomancak, and A. Cardona. 2012. Fiji: an open-source platform for biological-image  
1008 analysis. *Nat Methods*. 9:676-682.
- 1009 Schlager, M.A., H.T. Hoang, L. Urnavicius, S.L. Bullock, and A.P. Carter. 2014. In vitro  
1010 reconstitution of a highly processive recombinant human dynein complex. *The EMBO*  
1011 *journal*. 33:1855-1868.
- 1012 Sigismund, S., L. Lanzetti, G. Scita, and P.P. Di Fiore. 2021. Endocytosis in the context-dependent  
1013 regulation of individual and collective cell properties. *Nature reviews. Molecular cell biology*.  
1014 22:625-643.
- 1015 Silio, V., A.D. McAinsh, and J.B. Millar. 2015. KNL1-Bubs and RZZ Provide Two Separable  
1016 Pathways for Checkpoint Activation at Human Kinetochores. *Developmental cell*. 35:600-613.
- 1017 Simonetta, M., R. Manzoni, R. Mosca, M. Mapelli, L. Massimiliano, M. Vink, B. Novak, A.  
1018 Musacchio, and A. Ciliberto. 2009. The influence of catalysis on mad2 activation dynamics.  
1019 *PLoS Biol*. 7:e10.

- 1020 Sivaram, M.V., T.L. Wadzinski, S.D. Redick, T. Manna, and S.J. Doxsey. 2009. Dynein light  
1021 intermediate chain 1 is required for progress through the spindle assembly checkpoint. *The*  
1022 *EMBO journal*. 28:902-914.
- 1023 Stabrin, M., F. Schoenfeld, T. Wagner, S. Pospich, C. Gatsogiannis, and S. Raunser. 2020.  
1024 TranSPHIRE: automated and feedback-optimized on-the-fly processing for cryo-EM.  
1025 *Nature communications*. 11:5716.
- 1026 Stagg, S.M., C. Gurkan, D.M. Fowler, P. LaPointe, T.R. Foss, C.S. Potter, B. Carragher, and W.E.  
1027 Balch. 2006. Structure of the Sec13/31 COPII coat cage. *Nature*. 439:234-238.
- 1028 Stagg, S.M., P. LaPointe, and W.E. Balch. 2007. Structural design of cage and coat scaffolds that  
1029 direct membrane traffic. *Curr Opin Struct Biol*. 17:221-228.
- 1030 Starr, D.A., B.C. Williams, T.S. Hays, and M.L. Goldberg. 1998. ZW10 helps recruit dynactin and  
1031 dynein to the kinetochore. *The Journal of cell biology*. 142:763-774.
- 1032 Sundin, L.J., G.J. Guimaraes, and J.G. Deluca. 2011. The NDC80 complex proteins Nuf2 and  
1033 Hec1 make distinct contributions to kinetochore-microtubule attachment in mitosis.  
1034 *Molecular biology of the cell*. 22:759-768.
- 1035 ter Haar, E., A. Musacchio, S.C. Harrison, and T. Kirchhausen. 1998. Atomic structure of clathrin:  
1036 a beta propeller terminal domain joins an alpha zigzag linker. *Cell*. 95:563-573.
- 1037 Tripathi, A., Y. Ren, P.D. Jeffrey, and F.M. Hughson. 2009. Structural characterization of Tip20p  
1038 and Dsl1p, subunits of the Dsl1p vesicle tethering complex. *Nature structural & molecular*  
1039 *biology*. 16:114-123.
- 1040 Tunyasuvunakool, K., J. Adler, Z. Wu, T. Green, M. Zielinski, A. Zidek, A. Bridgland, A. Cowie,  
1041 C. Meyer, A. Laydon, S. Velankar, G.J. Kleywegt, A. Bateman, R. Evans, A. Pritzel, M.  
1042 Figurnov, O. Ronneberger, R. Bates, S.A.A. Kohl, A. Potapenko, A.J. Ballard, B. Romera-  
1043 Paredes, S. Nikolov, R. Jain, E. Clancy, D. Reiman, S. Petersen, A.W. Senior, K.  
1044 Kavukcuoglu, E. Birney, P. Kohli, J. Jumper, and D. Hassabis. 2021. Highly accurate  
1045 protein structure prediction for the human proteome. *Nature*. 596:590-596.
- 1046 Varma, D., P. Monzo, S.A. Stehman, and R.B. Vallee. 2008. Direct role of dynein motor in stable  
1047 kinetochore-microtubule attachment, orientation, and alignment. *The Journal of cell biology*.  
1048 182:1045-1054.
- 1049 Varma, D., X. Wan, D. Cheerambathur, R. Gassmann, A. Suzuki, J. Lawrimore, A. Desai, and E.D.  
1050 Salmon. 2013. Spindle assembly checkpoint proteins are positioned close to core  
1051 microtubule attachment sites at kinetochores. *The Journal of cell biology*. 202:735-746.
- 1052 Vassilev, L.T., C. Tovar, S. Chen, D. Knezevic, X. Zhao, H. Sun, D.C. Heimbrosk, and L. Chen.  
1053 2006. Selective small-molecule inhibitor reveals critical mitotic functions of human CDK1.  
1054 *Proceedings of the National Academy of Sciences of the United States of America*. 103:10660-10665.



- 1055 Wagner, T., F. Merino, M. Stabrin, T. Moriya, C. Antoni, A. Apelbaum, P. Hagel, O. Sitsel, T.  
1056 Raisch, D. Prumbaum, D. Quentin, D. Roderer, S. Tacke, B. Siebolds, E. Schubert, T.R.  
1057 Shaikh, P. Lill, C. Gatsogiannis, and S. Raunser. 2019. SPHIRE-crYOLO is a fast and  
1058 accurate fully automated particle picker for cryo-EM. *Commun Biol.* 2:218.
- 1059 Watson, E.R., N.G. Brown, J.M. Peters, H. Stark, and B.A. Schulman. 2019. Posing the APC/C  
1060 E3 Ubiquitin Ligase to Orchestrate Cell Division. *Trends Cell Biol.* 29:117-134.
- 1061 Weissmann, F., G. Petzold, R. VanderLinden, P.J. Huis In 't Veld, N.G. Brown, F. Lampert, S.  
1062 Westermann, H. Stark, B.A. Schulman, and J.M. Peters. 2016. biGBac enables rapid gene  
1063 assembly for the expression of large multisubunit protein complexes. *Proceedings of the*  
1064 *National Academy of Sciences of the United States of America.* 113:E2564-2569.
- 1065 Wickham, T.J., T. Davis, R.R. Granados, M.L. Shuler, and H.A. Wood. 1992. Screening of insect  
1066 cell lines for the production of recombinant proteins and infectious virus in the baculovirus  
1067 expression system. *Biotechnol Prog.* 8:391-396.
- 1068 Williams, B.C., M. Gatti, and M.L. Goldberg. 1996. Bipolar spindle attachments affect  
1069 redistributions of ZW10, a *Drosophila* centromere/kinetochore component required for  
1070 accurate chromosome segregation. *The Journal of cell biology.* 134:1127-1140.
- 1071 Wojcik, E., R. Basto, M. Serr, F. Scaerou, R. Karess, and T. Hays. 2001. Kinetochore dynein: its  
1072 dynamics and role in the transport of the Rough deal checkpoint protein. *Nature cell biology.*  
1073 3:1001-1007.
- 1074 Wynne, D.J., and H. Funabiki. 2015. Kinetochore function is controlled by a phospho-dependent  
1075 coexpansion of inner and outer components. *The Journal of cell biology.* 210:899-916.
- 1076 Yamamoto, T.G., S. Watanabe, A. Essex, and R. Kitagawa. 2008. SPDL-1 functions as a  
1077 kinetochore receptor for MDF-1 in *Caenorhabditis elegans*. *The Journal of cell biology.*  
1078 183:187-194.
- 1079 Yang, Z., J. Fang, J. Chittuluru, F.J. Asturias, and P.A. Penczek. 2012. Iterative stable alignment  
1080 and clustering of 2D transmission electron microscope images. *Structure.* 20:237-247.
- 1081 Yao, X., K.L. Anderson, and D.W. Cleveland. 1997. The microtubule-dependent motor  
1082 centromere-associated protein E (CENP-E) is an integral component of kinetochore  
1083 corona fibers that link centromeres to spindle microtubules. *The Journal of cell biology.*  
1084 139:435-447.
- 1085 Zhang, G., T. Lischetti, D.G. Hayward, and J. Nilsson. 2015. Distinct domains in Bub1 localize  
1086 RZZ and BubR1 to kinetochores to regulate the checkpoint. *Nature communications.* 6:7162.
- 1087 Zheng, S.Q., E. Palovcak, J.P. Armache, K.A. Verba, Y. Cheng, and D.A. Agard. 2017.  
1088 MotionCor2: anisotropic correction of beam-induced motion for improved cryo-electron  
1089 microscopy. *Nat Methods.* 14:331-332.

1090 Zivanov, J., T. Nakane, and S.H.W. Scheres. 2019. A Bayesian approach to beam-induced motion  
1091 correction in cryo-EM single-particle analysis. *IUCrJ*. 6:5-17.  
1092

## 1093 **Figure Legends**

### 1094 **Figure 1. *Structural organization of the RZZ complex***

1095 (A) Schematic representation of human RZZ subunits. (B) 3D reconstruction of the RZZ complex  
1096 with densities corresponding to ROD-A, Zwilch-A, and ZW10-A colored in firebrick, yellow-  
1097 orange, and deepblue, respectively. ROD-B, Zwilch-B, and ZW10-B are displayed in equivalent  
1098 lighter colors as indicated. (C) Cartoon model of the RZZ complex with coloring scheme like in  
1099 panel A. The position of the internal 2-fold axis of the 2:2:2 hexamer is shown. The N- and C-  
1100 termini of ROD are indicated. Panels B-E and all other panels displaying molecular features were  
1101 generated with PyMol (The PyMOL Molecular Graphics System, Version 1.2r3pre, Schrödinger,  
1102 LLC.). (D) 90-degree-rotated view of the complex with linear dimensions. (E) The conservation  
1103 of residues in an alignment of ROD, Zwilch, and ZW10 is displayed on the surface of the complex  
1104 (dark, highly conserved; light, poorly conserved). For all subunits, conservation was calculated  
1105 from an alignment of sequences from *C. elegans* (Ce), *D. melanogaster* (Dm), *X. tropicalis* (Xt), *D. rerio*  
1106 (Dr), *Bos taurus* (Bt), *Mus musculus* (Mm), and *Homo sapiens* (Hs). (F) 180-degree-rotated view of the  
1107 complex. The highest degree of conservation is observed in ZW10. See also alignments in [Figure](#)  
1108 [1 – Supplement 1](#).

1109

### 1110 **Figure 2. *Homo- and heterotypic intermolecular interactions in RZZ***

1111 (A) The ROD-A and ROD-B protomers are related by 2-fold symmetry and interact through two  
1112 main regions positioned between residues 485-690 and 1790-2125. (B) A particular prominent  
1113 interaction of ROD-A and ROD-B consists in the insertion of the 655-680 loop of one protomer  
1114 into a cradle formed by the bending C-terminal region of the second protomer. (C) Zwilch  
1115 interacts very prominently with only one of the two ROD protomers, sandwiched between the N-  
1116 terminal  $\beta$ -propeller and residue 850. A few interactions also link Zwilch to the C-terminal region  
1117 of the second protomer. (D) A rotated view shows that ZW10 forms a highly bent, U-shaped  
1118 complex with a relatively small inter-protomer interface. (E) The 2-fold axis of the complex  
1119 (shown in [Figure 1B](#)) crosses the interface between ZW10-A and ZW10-B. (F) Molecular details  
1120 of the interface between ZW10-A and ZW10-B with side chains of residues involved.

1121

### 1122 **Figure 3. *A farnesyl-binding pocket in the ROD propeller***

1123 (A) Schematic representation of HsSpindly. The position of a CC1 box (red) and of the Spindly  
1124 box (green) required for binding Dynein:Dynactin are shown, together with the position of

1125 relevant predicted coiled-coil regions. **(B)** Cartoon representation of the 7-bladed ROD  $\beta$ -  
1126 propeller (indicated as blades 1-7). The positions of blade 2, blade 3, and an  $\alpha$ -helical hairpin  
1127 representing an insertion between strands  $\beta$ C3 and  $\beta$ D3 are indicated. The four strands of each  
1128 blade is indicated as A-D, with A and D being the innermost and outermost strands. The circle  
1129 represents the entry point of the farnesyl binding pocket. **(C)** Surface representation of the ROD  
1130  $\beta$ -propeller. The circle is in the same position shown in panel A. The position of Leu120 is shown  
1131 in yellow. This residue was targeted by photoactivatable crosslinker groups introduced in the  
1132 farnesyl group attached to Cys602 of Spindly (Mosalaganti et al., 2017). **(D)** The position of a  
1133 modelled peptide corresponding to the C-terminal region of Spindly as predicted by AlphaFold2  
1134 (Jumper et al., 2021; Tunyasuvunakool et al., 2021) with a farnesyl moiety modelled on Cys602.  
1135 **(E-F)** A farnesyl moiety, shown in cyan spheres together with a few C-terminal residues of a  
1136 modelled Spindly peptide, fitted snugly into a pocket lined exclusively by the side chains of several  
1137 hydrophobic residues. **(G)** Size-exclusion chromatography profiles and corresponding SDS-  
1138 PAGE of the indicated samples. Two mutant RZZ complexes containing mutations in ROD  
1139 L110F-L119F-L120K or I191M are indicated respectively as FFK and I/M. Note that in the  
1140 bottom SDS-PAGE the first and second lane were deliberately inverted and contain the first eluted  
1141 fraction and the molecular weight marker. For all other shown SDS-PAGE gels, the marker  
1142 precedes the first fraction.

1143

1144 **Figure 4. *MPS1 and Spindly promote corona assembly***

1145 **(A)** Confocal fluorescence microscopy-based filamentation assay at 561 nm shows  $^{mCh}RZZS^F$  (4  
1146  $\mu$ M), but not  $^{mCh}RZZ$  (4  $\mu$ M) or  $^{mCh}S$  (4  $\mu$ M) as controls, forms filaments at 30°C. Scale bar: 5  $\mu$ m.  
1147 **(B)** Coomassie and ProQ Diamond-stained gels on  $^{mCh}RZZS^F$  (4  $\mu$ M) treated with the indicated  
1148 kinases (1  $\mu$ M) for 15 hours at 20°C. Rev = reversine, used at 10  $\mu$ M. These were precisely the  
1149 samples studied in experiments in panel C. **(C)** A filamentation assay as in **A** demonstrates  
1150 sufficiency of MPS1 phosphorylation for filamentation. **(D)** Levels of Zwilch at kinetochores of  
1151 HeLa cells that had been previously synchronized in G2 phase with 9  $\mu$ M RO3306 for 16 h and  
1152 then released into mitosis. Subsequently, cells were immediately treated with 500 nM Reversine,  
1153 3.3  $\mu$ M nocodazole, and 10  $\mu$ M MG132 for 1 hour and imaged while in mitosis. CREST serum  
1154 was used to visualize kinetochores and DAPI to stain DNA. Scale bar: 10  $\mu$ m. **(E)** Cells treated as  
1155 for panel **D** were treated for visualization of Spindly. **(F)** Scatter dot plots representing normalized  
1156 total area of the Zwilch and Spindly signals, normalized to the reversine-untreated control, in the  
1157 indicated number of cells from the experiment shown in panels C-D. Red lines indicate mean and

1158 standard deviation. **(G)** Representative images showing the effects of a knockdown of the  
1159 endogenous Spindly in HeLa cells. RNAi treatment was performed for 48 h with 50 nM siRNA.  
1160 Before fixation, cells were synchronized in G2 phase with 9  $\mu$ M RO3306 for 16 h and then released  
1161 into mitosis. Subsequently, cells were immediately treated with 3.3  $\mu$ M nocodazole for an  
1162 additional hour. CREST serum was used to visualize kinetochores and DAPI to stain DNA. Scale  
1163 bar: 10  $\mu$ m **(H)** Scatter dot plots representing normalized intensity ratios of Spindly over CREST  
1164 for individual kinetochores of cells from the experiment shown in panel **G**. Red lines indicate  
1165 median with interquartile range. **(I)** Levels of CENP-E and Zwilch were assessed in control cells  
1166 and in cells treated as in panel **G** to knockdown Spindly. **(J)** Scatter dot plots representing  
1167 normalized total area of the CENP-E and Zwilch signals, normalized to the RNAi negative  
1168 control, in the indicated number of cells from the experiment shown in panel I. Red lines indicate  
1169 mean and standard deviation.

1170

### 1171 **Figure 5** *An autoinhibited state of the RZZS complex*

1172 **(A)** MPS1-induced filamentation experiments demonstrate that the phosphomimetic T13E/S15E  
1173 ROD mutant bypasses the filamentation blockade induced by the MPS1 inhibitor reversine. The  
1174 T13A/S15A mutant prevents MPS1-induced filamentation altogether. Scale bars in panels A, D,  
1175 F, G = 5  $\mu$ m. **(B)** The AF2 model confidence score (pLDDT, displayed blue to red through green  
1176 from highly to poorly reliable) highlights regions of the model predicted with high or poor  
1177 confidence, respectively (Jumper et al., 2021; Tunyasuvunakool et al., 2021). **(C)** A predicted N-  
1178 terminal extension (green) of the ROD  $\beta$ -propeller (red), slightly rotated from the view in B. The  
1179 propeller proper begins with strand  $\beta$ 7d and ends with strand  $\beta$ 7c, which leads into the helical  
1180 domain. The N-terminal extension augments the sixth and seventh blades with external  $\beta$ -strands  
1181 ( $\beta$ 6e and  $\beta$ 7e). The position of T13 and S15 on the extension is shown. **(D)** The phosphorylation  
1182 state of RZZ and Spindly<sup>F</sup> was monitored by ProQ Diamond after SDS-PAGE separation of  
1183 reactions. **(E)** Filamentation assays with the indicated combinations of 8  $\mu$ M <sup>mCh</sup>RZZS<sup>F</sup>, MPS1 (1  
1184  $\mu$ M), and Lambda phosphatase (0.4 mg/ml) in presence of 10  $\mu$ M reversine. Dephosphorylation  
1185 reactions were carried out on already formed filaments (see **Methods**). Samples were imaged by  
1186 confocal microscopy. Dephosphorylation does not dissolve already formed filaments. **(F)** An N-  
1187 terminal deletion mutant of ROD ( $\Delta$ 15) removing the first 15 N-terminal residues that include the  
1188 MPS1 phosphorylation sites Thr13 and Ser15 is unable to form filament in presence of MPS1 at  
1189 20°C, but can form filaments upon mildly heating to 30°C. **(G)** RZZ and RZZS complexes were  
1190 reconstituted with the Zwilch<sup>E422A/D426A</sup> mutant and tested for filamentation at 20°C in presence of

1191 MPS1 or upon mildly heating to 30°C. These experiments are also displayed in **Figure 5 –**  
1192 **Supplement 1A (H)** Surface representation of the RZZ model depicting the position of Zwilch<sup>E422</sup>  
1193 and Zwilch<sup>D422</sup> (in purple) and the positions of the ROD N-terminal region (green) and the highly  
1194 conserved ZW10 N-terminus.

1195

### 1196 **Figure 6 Ultrastructural analysis of RZZS sheets and filaments**

1197 (A) Negative-stain electron microscopy analysis of heat- and MPS1-induced sheets of filament of  
1198 farnesylated <sup>mCh</sup>RZZS. Scale bar (black): 200 nm. (B) <sup>mCh</sup>RZZ<sup>mCh</sup>S forms rings and curved single  
1199 filaments rather than sheets. Scale bar: 200 nm. (C) The GFP of Spindly was removed with  
1200 Precision protease, and the resulting objects were imaged by negative stain EM. Scale bar: 200  
1201 nm. (D) Heat- and MPS1-induced rings of <sup>mCh</sup>RZZ<sup>mCh</sup>S have similar diameters.

1202

### 1203 **Figure 7 Influence of Spindly on corona assembly and kinetochore recruitment**

1204 (A) Size-exclusion chromatography and SDS-PAGE of elution fractions of the indicated samples.  
1205 Each Spindly construct was incubated with RZZ in absence (dotted lines) or in presence  
1206 (continuous lines) of farnesyl transferase and farnesyl pyrophosphate. Elution shifts of Spindly<sup>F</sup>  
1207 and of the resulting RZZS<sup>F</sup> complexes is indicative of successful interaction. (B) MPS1-induced  
1208 filamentation experiments on the indicated <sup>mCh</sup>RZZS<sup>F</sup> complexes (4 μM, further diluted to 0.5 μM  
1209 for imaging) using a confocal spinning disk fluorescence microscope at 561 nm. (C) Schematic of  
1210 the cell synchronization and imaging experiment shown in D. After electroporation, cells were  
1211 allowed to recover for 8 hours. Subsequently, cells were synchronized in G2 phase with 9 μM  
1212 RO3306 for 15 hours and then released into mitosis by inhibitor washout. Before fixation, cells  
1213 were treated with 3.3 μM nocodazole for 1 hour. (D) Representative images of fixed HeLa cell  
1214 electroporated with full-length Spindly and Spindly<sup>354-605</sup> constructs in cells depleted of endogenous  
1215 Spindly by RNAi. Spindly localization was detected with an antibody against the C-terminal region  
1216 of Spindly. Corona expansion or lack thereof were monitored through CENP-E. CREST serum  
1217 was used to visualize kinetochores, DAPI to stain for DNA. Scale bar: 10 μm. (E) Scatter dot plots  
1218 representing normalized intensity ratios of the indicated Spindly constructs over CREST for  
1219 individual kinetochores of cells from the experiment shown in panel D. Red lines indicate median  
1220 with interquartile range. (F) Cells treated like in C-D were electroporated with the indicated  
1221 <sup>mCh</sup>Spindly constructs. Corona expansion was evaluated through the appearance of Zwilch. (G)  
1222 Kinetochore intensities were quantified like in panel E.

1223 **Supplemental Figure Legends**

1224 **Figure 1 – supplement 1 *EM data analyses***

1225 (A) Processing scheme including an exemplary micrograph and a subset of selected 2D classes of  
1226 RZZ. (B) Fourier Shell Correlation (FSC) curves of a global (i.e. non-focused) non-uniform 3D  
1227 refinement in cryoSPARC. The dashed line indicates the 0.143 FSC criterion that intersects the  
1228 masked FSC curve at 3.94 Å. (C) Local resolution plotted on the locally filtered reconstruction  
1229 obtained by non-uniform refinement in a rainbow-colored gradient from blue (3.7 Å) to red (8.0  
1230 Å). (D) Angular distribution displayed as colored bars.

1231

1232 **Figure 1 – supplement 2 *Multiple sequence alignment of ROD and ZW10***

1233 ROD and ZW10 sequences from *Caenorhabditis elegans* (Ce), *Drosophila melanogaster* (Dm), *Xenopus*  
1234 *tropicalis* (Xt), *Danio rerio* (Dr), *Bos taurus* (Bt), *Mus musculus* (Mm), and *Homo sapiens* (Hs) were aligned  
1235 with MAFFT (Kato et al., 2002) and visualized with software developed in house. The secondary  
1236 structure of the two RZZ subunits (straight black lines on green,  $\beta$ -strands; loopy black lines on  
1237 red, helices; grey, coils) is displayed above the aligned sequences. For ROD, note in the second  
1238 row a helical hairpin discussed in the text that lines the farnesyl-binding cavity, and the  
1239 corresponding short deletions in species (Ce and Dm) where Spindly is not farnesylated.

1240

1241 **Figure 2 – Supplement 1 *Comparison of structural homologs of RZZ subunits***

1242 (A) Cartoon model of ROD and of the indicated proteins that share the same structural  
1243 organization of ROD. PDB ID codes are included. (B) Structural superposition of Zwilch in our  
1244 cryo-EM reconstruction (yellow) and of the previously published crystal structure of Zwilch  
1245 (green) (Civril et al., 2010). (C) Cartoon model of ZW10 and superposition with Tip20, a related  
1246 *S. cerevisiae*'s ortholog. The interdomain angle of the N- and C-terminal domains is very different  
1247 in the two structures.

1248

1249 **Figure 3 – Supplement 1 *Comparison of the HsROD and CeROD  $\beta$ -propellers***

1250 (A) The  $\beta$ -propeller of human ROD already shown in [Figure 3B](#) with the indicated farnesyl-  
1251 binding site. (B)  $\beta$ -propeller of *C. elegans*' ROD predicted by AlphaFold2 (Jumper et al., 2021;  
1252 Tunyasuvunakool et al., 2021). (C-D) Modelled farnesyl groups in the two structures demonstrate

1253 occlusion of the binding cavity in *C. elegans*, where M184 is predicted to sterically clash with a  
1254 hypothetical farnesyl moiety.

1255

1256 **Figure 4 – Supplement 1 *Additional polymerization and cell biology experiments***

1257 **(A-B)** Assessment of requirements for MPS1 phosphorylation for corona assembly *in vitro*.

1258 Samples 1-8 are shown on the left in Coomassie-stained and ProQ Diamond-stained SDS-PAGE.

1259 The content of samples 1-8 is described in the legend under panel A, and additionally for samples

1260 2-5 over each polymerization experiment in panel B, where the encircled P signals which sample

1261 was pre-phosphorylated with MPS1 and which samples were treated with reversine to inhibit

1262 MPS1. In B, samples were imaged in a spinning disk confocal microscope at 561 nm. Scale bar =

1263 5  $\mu\text{m}$ . **(C)** Heat-induced polymerization experiments with  $^{\text{mCh}}\text{RZZ}$  and wild-type Spindly<sup>F</sup> or

1264 Spindly<sup>F(C602A)</sup> that cannot be farnesylated. The same positive control is also shown in **Figure 7 –**

1265 **Supplement 1B**. **(D)** Levels of BUB1 at kinetochores of HeLa cells that had been previously

1266 synchronized in G2 phase with 9  $\mu\text{M}$  RO3306 for 16 h and then released into mitosis.

1267 Subsequently, cells were immediately treated with 500 nM reversine, 3.3  $\mu\text{M}$  nocodazole, and 10

1268  $\mu\text{M}$  MG132 for 1 hour. CREST serum was used to visualize kinetochores and DAPI to stain DNA.

1269 Scale bar: 10  $\mu\text{m}$ . **(E)** Scatter dot plots representing normalized intensity ratios of BUB1 over

1270 CREST for individual kinetochores of cells from the experiment shown in panel C. Red lines

1271 indicate median with interquartile range. **(F)** HeLa cells were synchronized in G2 phase with 9  $\mu\text{M}$

1272 RO3306 for 16 hours and the released into mitosis by withdrawing the inhibitor. Cells were

1273 immediately treated with 3.3  $\mu\text{M}$  nocodazole to prevent microtubule depolymerization and allow

1274 maximal corona expansion. After one hour, cells were treated again with RO3306 for the indicated

1275 time points, before fixation and further processed for fluorescence microscopy. CREST serum

1276 was used to visualize kinetochores and DAPI to visualize DNA. Scale bar: 10  $\mu\text{m}$ . **(G)**

1277 Quantification of the experiment in panel E. **(H)** DLD-1 cells treated like in panel E were released

1278 from the G2 arrest into mitosis for 1 hour in presence of 3.3  $\mu\text{M}$  nocodazole, 500 nM hesperadine,

1279 and 10  $\mu\text{M}$  MG132, fixed, and further processed for fluorescence microscopy.

1280

1281 **Figure 5 – Supplement 1 *Additional in vitro polymerization and biochemical experiments***

1282 **(A)** The first two rows of experiments are already displayed as the two rows of **Figure 5A**. The

1283 third row is added to demonstrate that the  $^{\text{mCh}}\text{RZZS}^{\text{F}}$  complex carrying T13A/S15A mutations on

1284 ROD, which does not spontaneously filament in presence of MPS1 at 20°C, will form filaments

1285 upon mild heating at 30°C, indicating that its ability to polymerize is not compromised. Scale bar:



1286 5  $\mu$ M. (B) None of the indicated samples forms filaments in absence of Spindly<sup>F</sup>. Scale bar: 5  $\mu$ m.  
1287 (C) Size-exclusion chromatography experiment demonstrating that RZZ complex carrying  
1288 E422A/D426A mutations interacts with Spindly<sup>F</sup> as strongly as its wild type counterpart.

1289

### 1290 **Figure 6 – Supplement 1**

1291 (A) Untagged RZZS<sup>F</sup> formed sheets indistinguishable from those formed by <sup>mCh</sup>RZZS<sup>F</sup>. Scale bar  
1292 (black line): 200 nm. (B) Sheets were also formed by <sup>mCh</sup>RZZS<sup>F</sup> containing the T13A/S15A  
1293 mutations on ROD upon heating the sample to 30°C. The phosphomimetic mutant T13E/S15E  
1294 of the same complex assembled into filaments spontaneously at 20°C. The <sup>mCh- $\Delta$ 15</sup>RZZS<sup>F</sup> forms  
1295 sheets at 30°C. Scale bar (black line): 200 nm. (C) <sup>mCh</sup>RZZ/<sup>GFP</sup>S<sup>F</sup> formed ring structures or curved  
1296 filaments similar to those observed with <sup>mCh</sup>RZZ/<sup>mCh</sup>S<sup>F</sup>. (D) 2D class averages of segments of  
1297 negatively-stained single circles or filaments like those shown in panel C. Note the extreme  
1298 orientation preference of the various classes. Scale bar: 50 nm. (E) Enlargement of one class  
1299 average shown in D with indicated dimensions. (F) A size comparison from a field of <sup>mCh</sup>RZZ<sup>mCh</sup>S<sup>F</sup>  
1300 and <sup>GFP</sup>CENP-E at kinetochore coronas of nocodazole-treated HeLa cells is shown at the same  
1301 magnification to emphasize the similarity of curvatures in rings and coronas.

1302

### 1303 **Figure 7 – Supplement 1 *Additional biochemical experiments***

1304 (A) Heat-induced filaments of the indicated species. Note that Spindly<sup>F(250-605)</sup> and Spindly<sup>F( $\Delta$ 276-306)</sup>  
1305 may show a combination of slight precipitation and filamentation when filamentation is induced  
1306 with heat. The same positive control is also shown in **Figure 5 – Supplement 1D**. (B) Size-exclusion  
1307 chromatography of Spindly<sup>F( $\Delta$ 276-306)</sup>, RZZ, and their complex. (C) Titration of <sup>mCh</sup>RZZ and Spindly<sup>F</sup>  
1308 at the indicated concentrations.

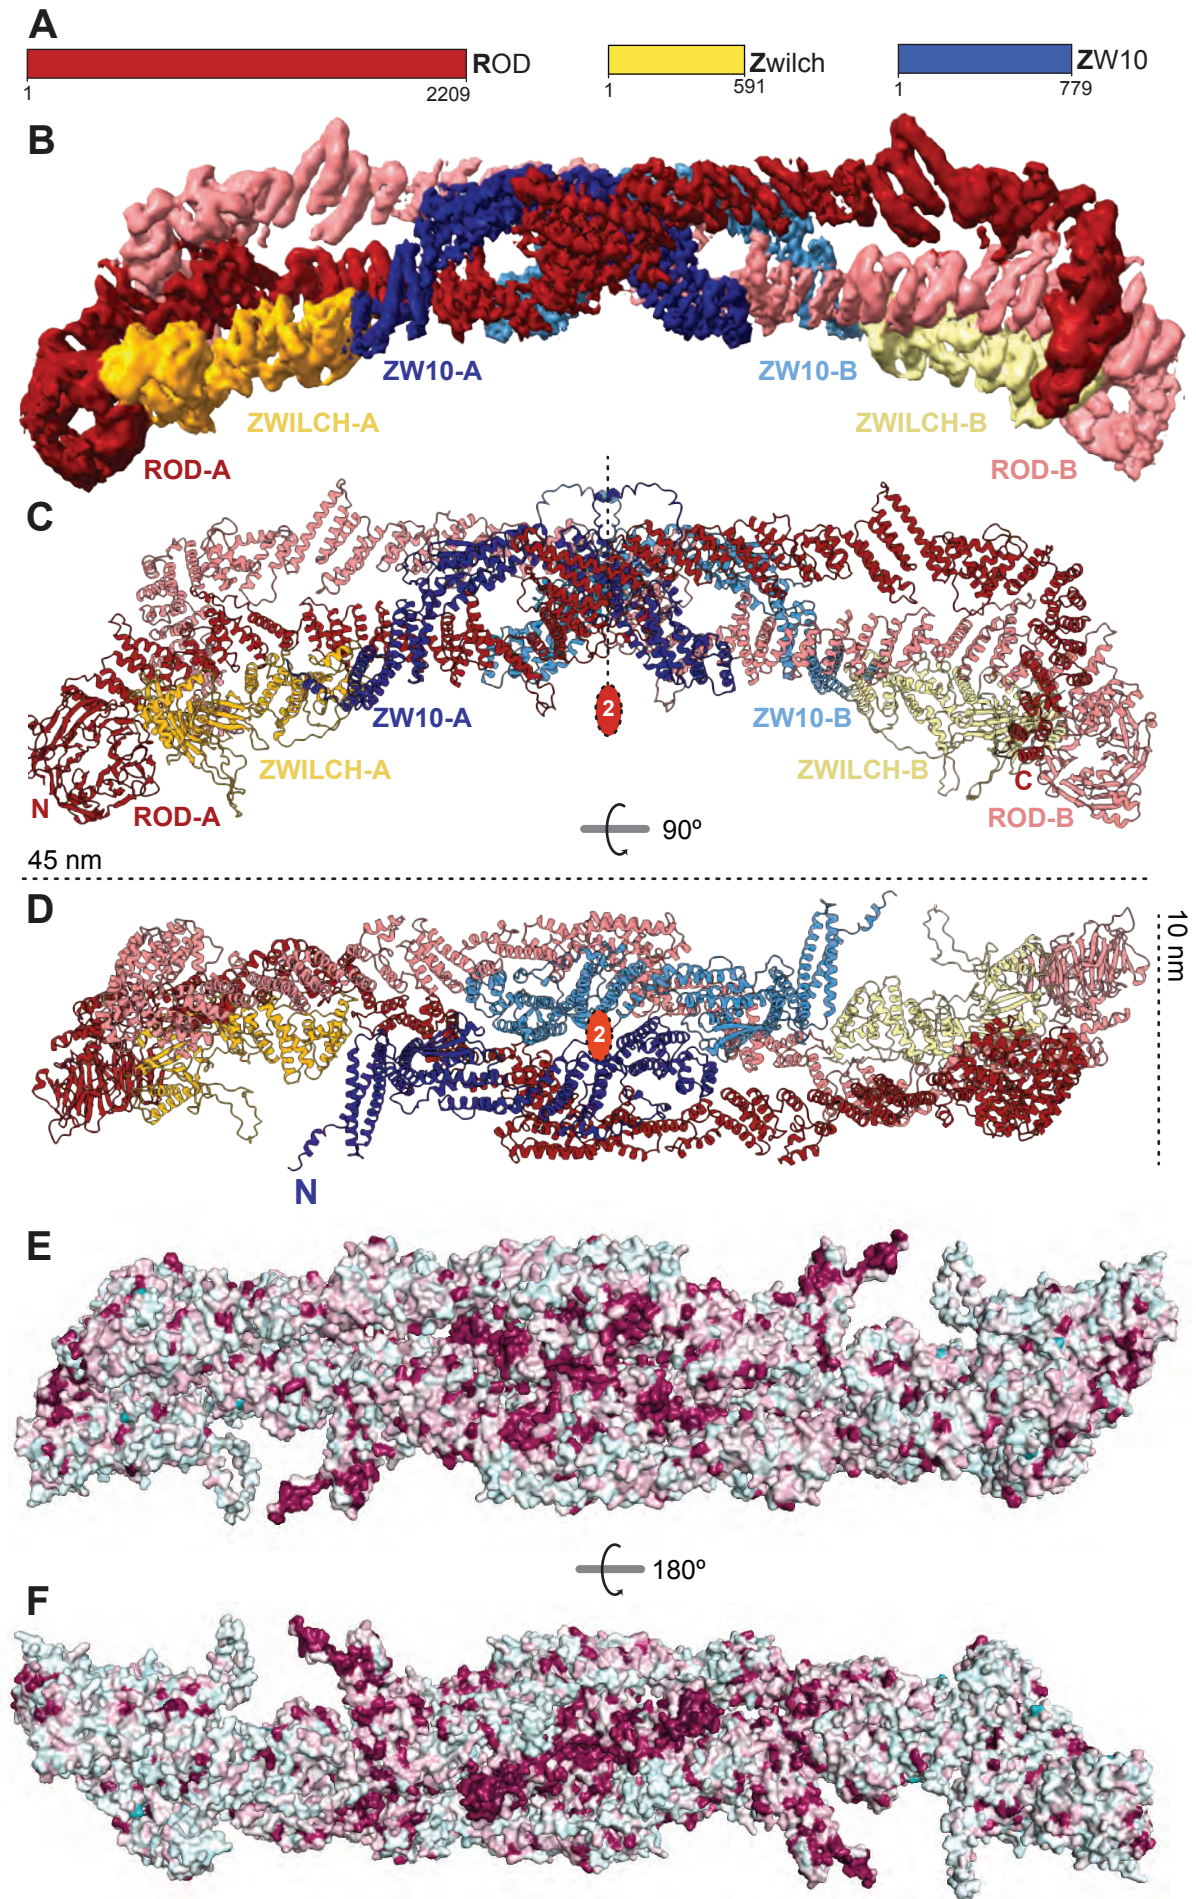

Figure 1

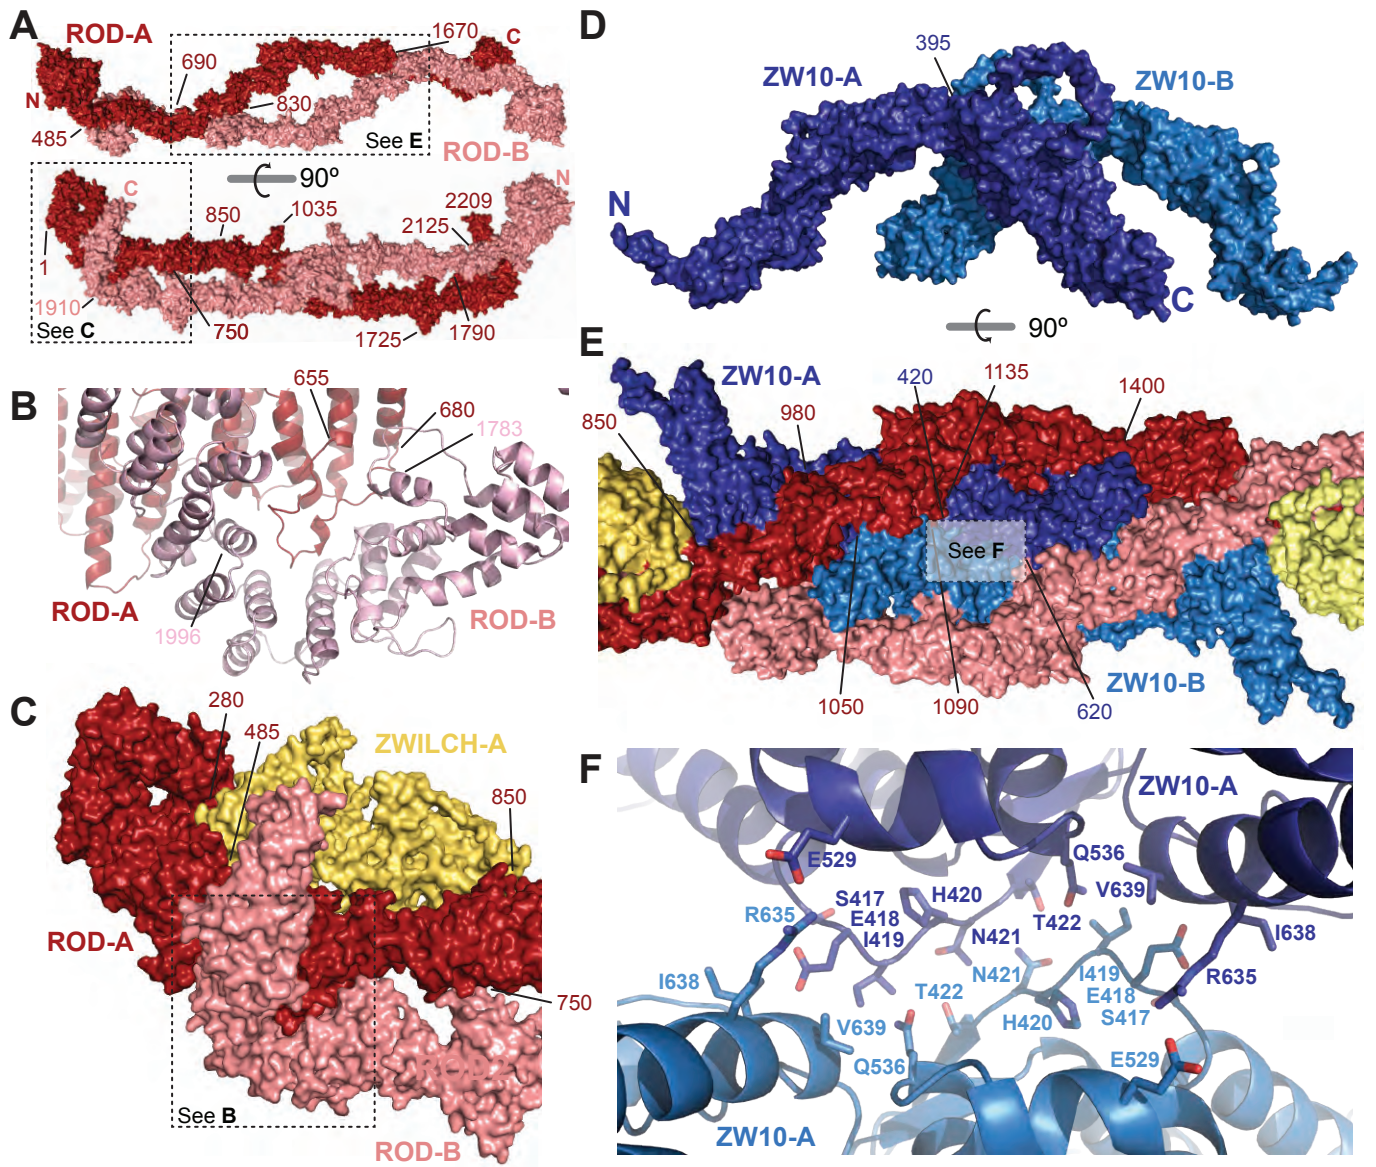

Figure 2

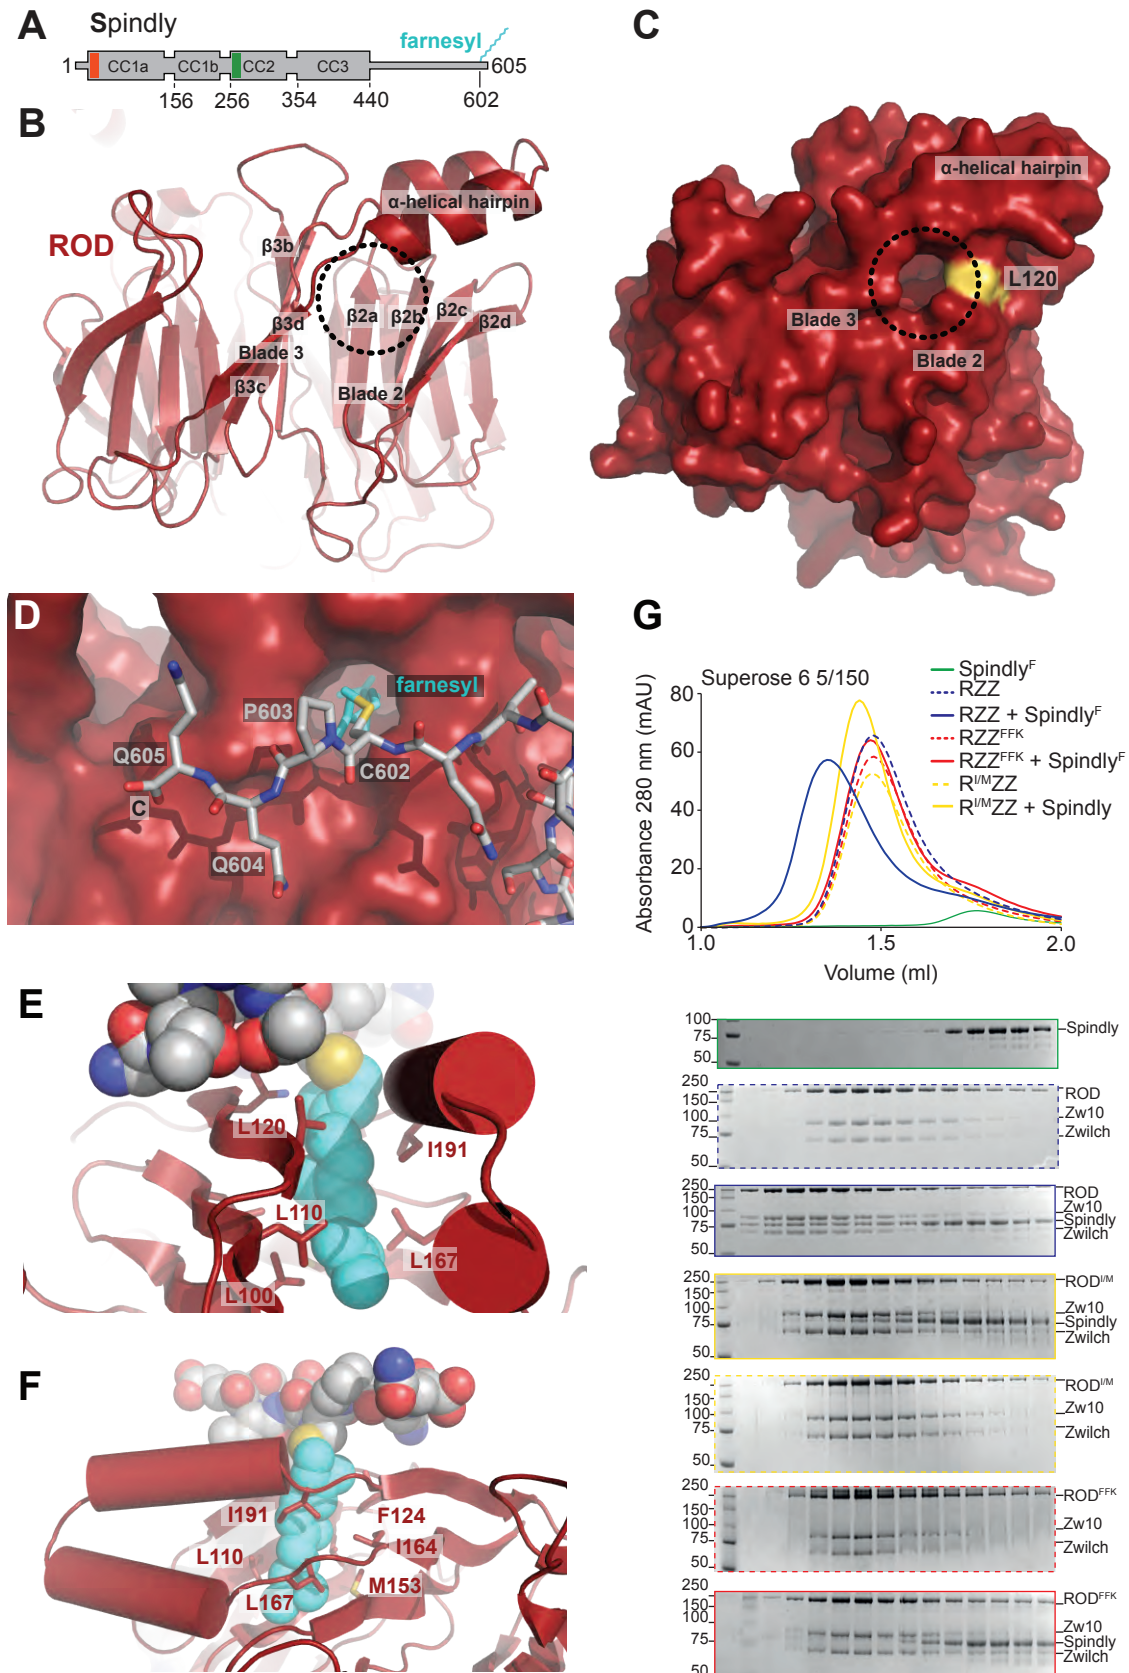

Figure 3

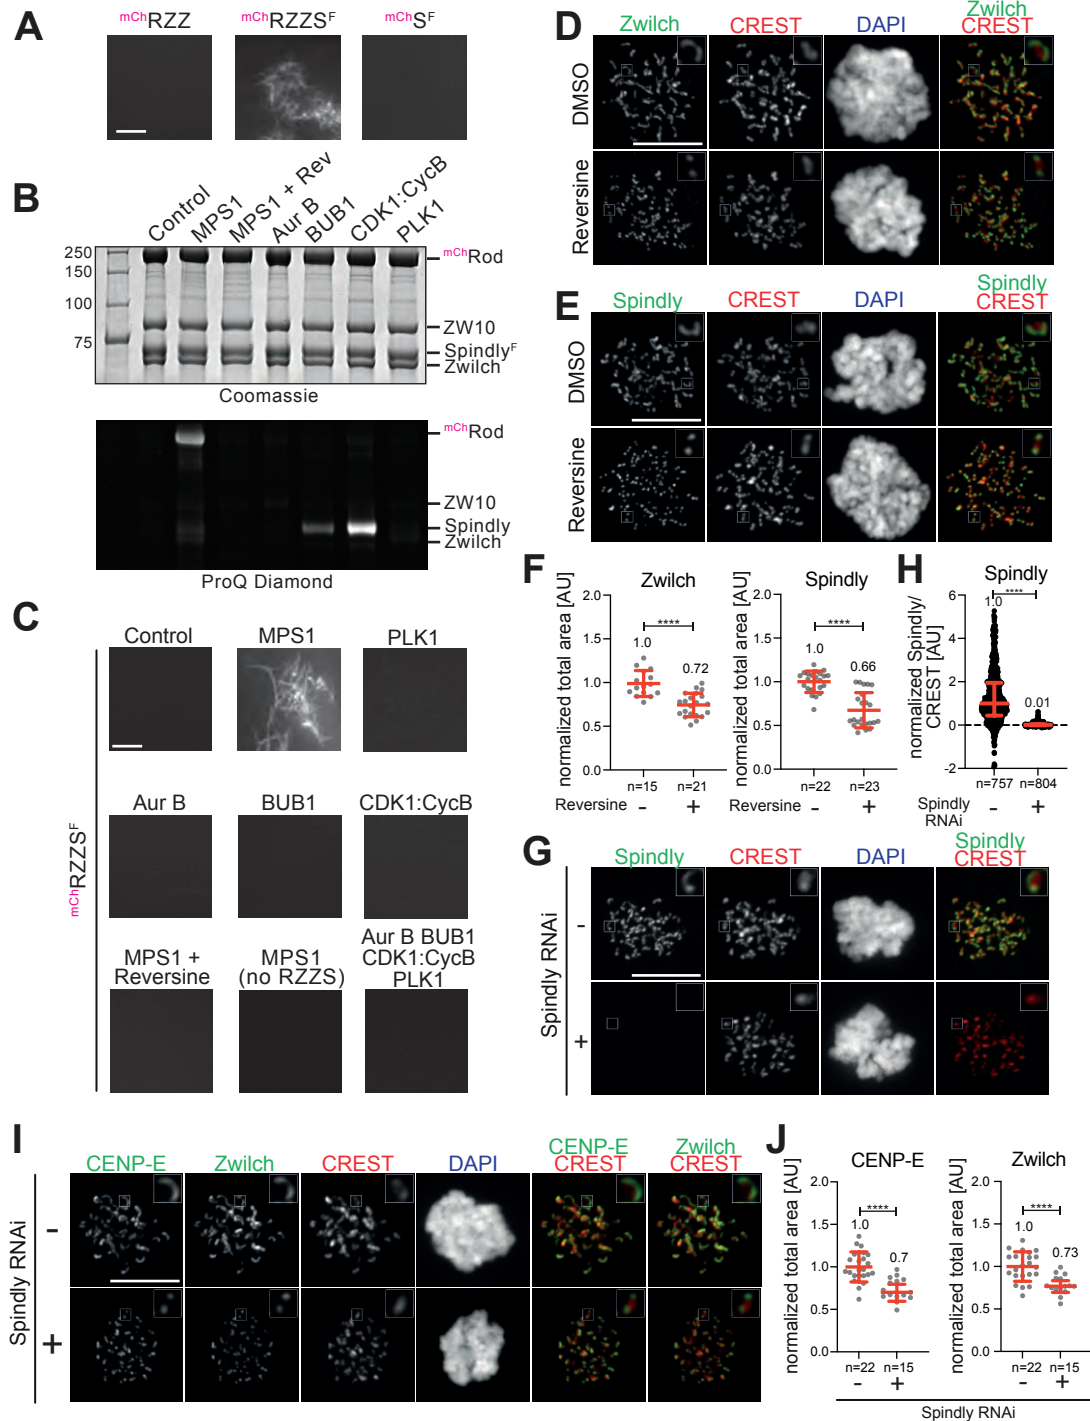

Figure 4

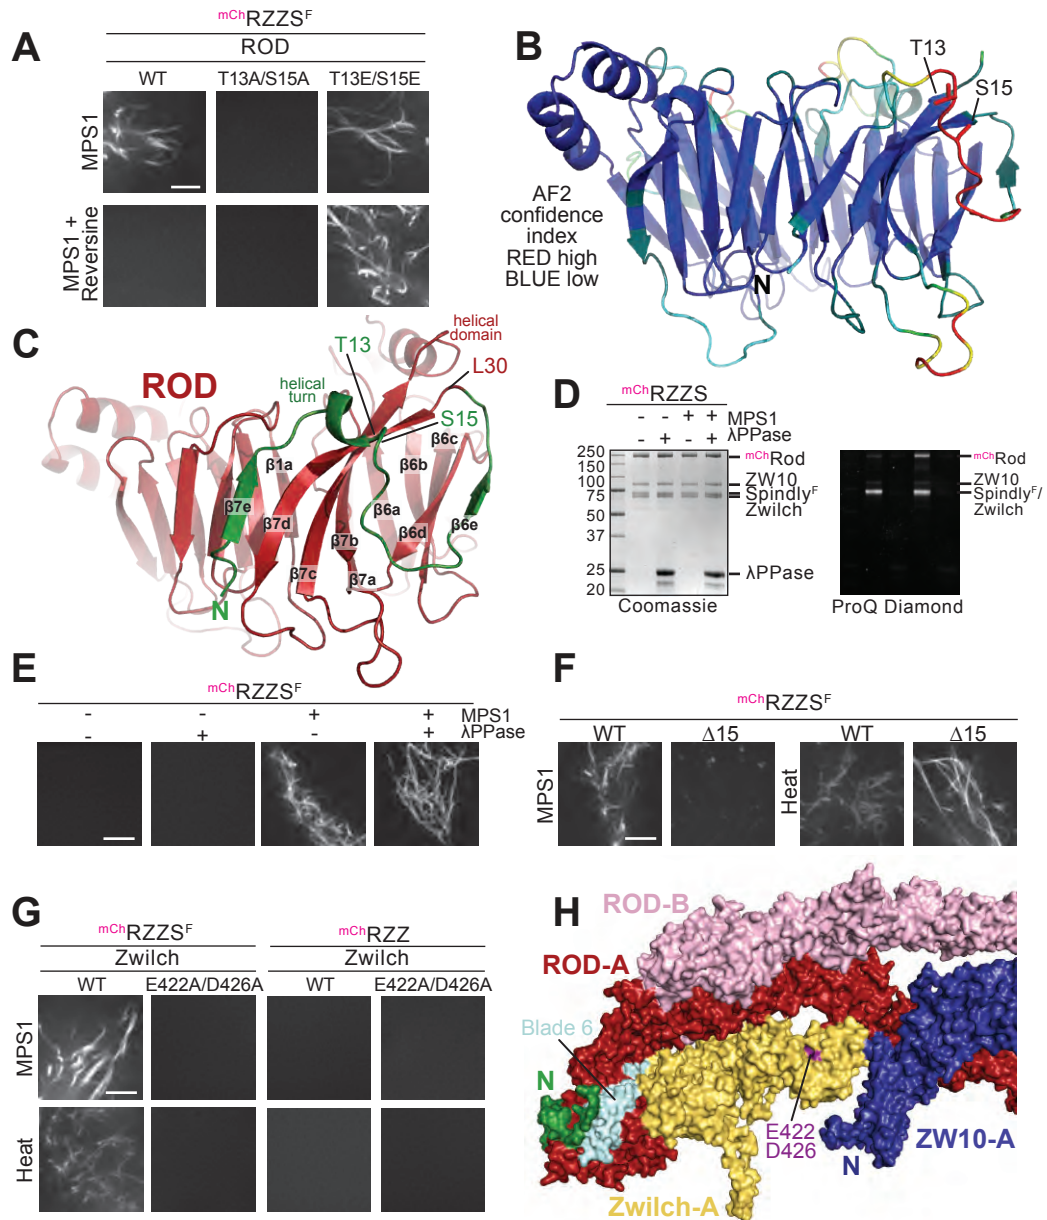

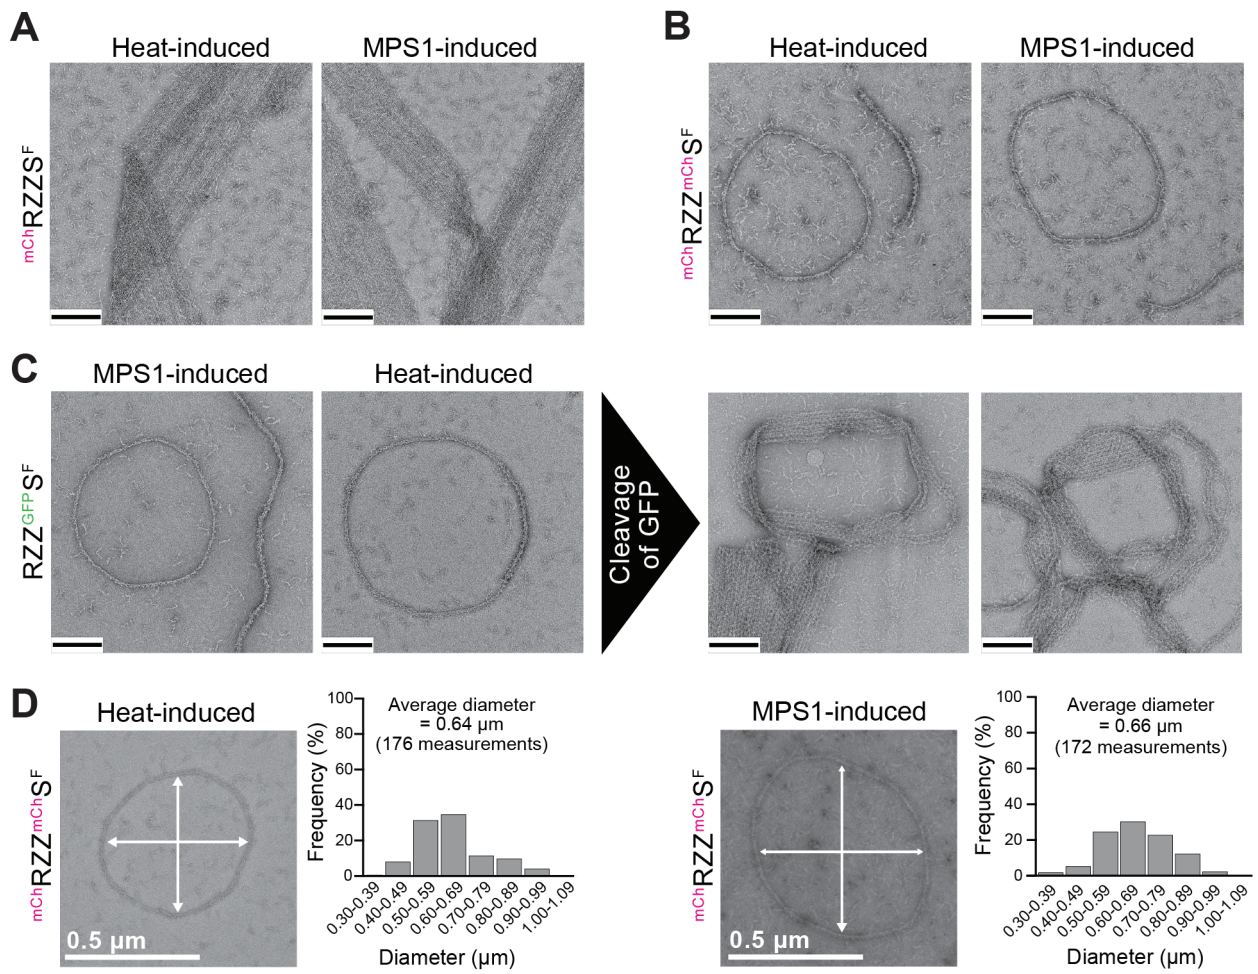

Figure 6

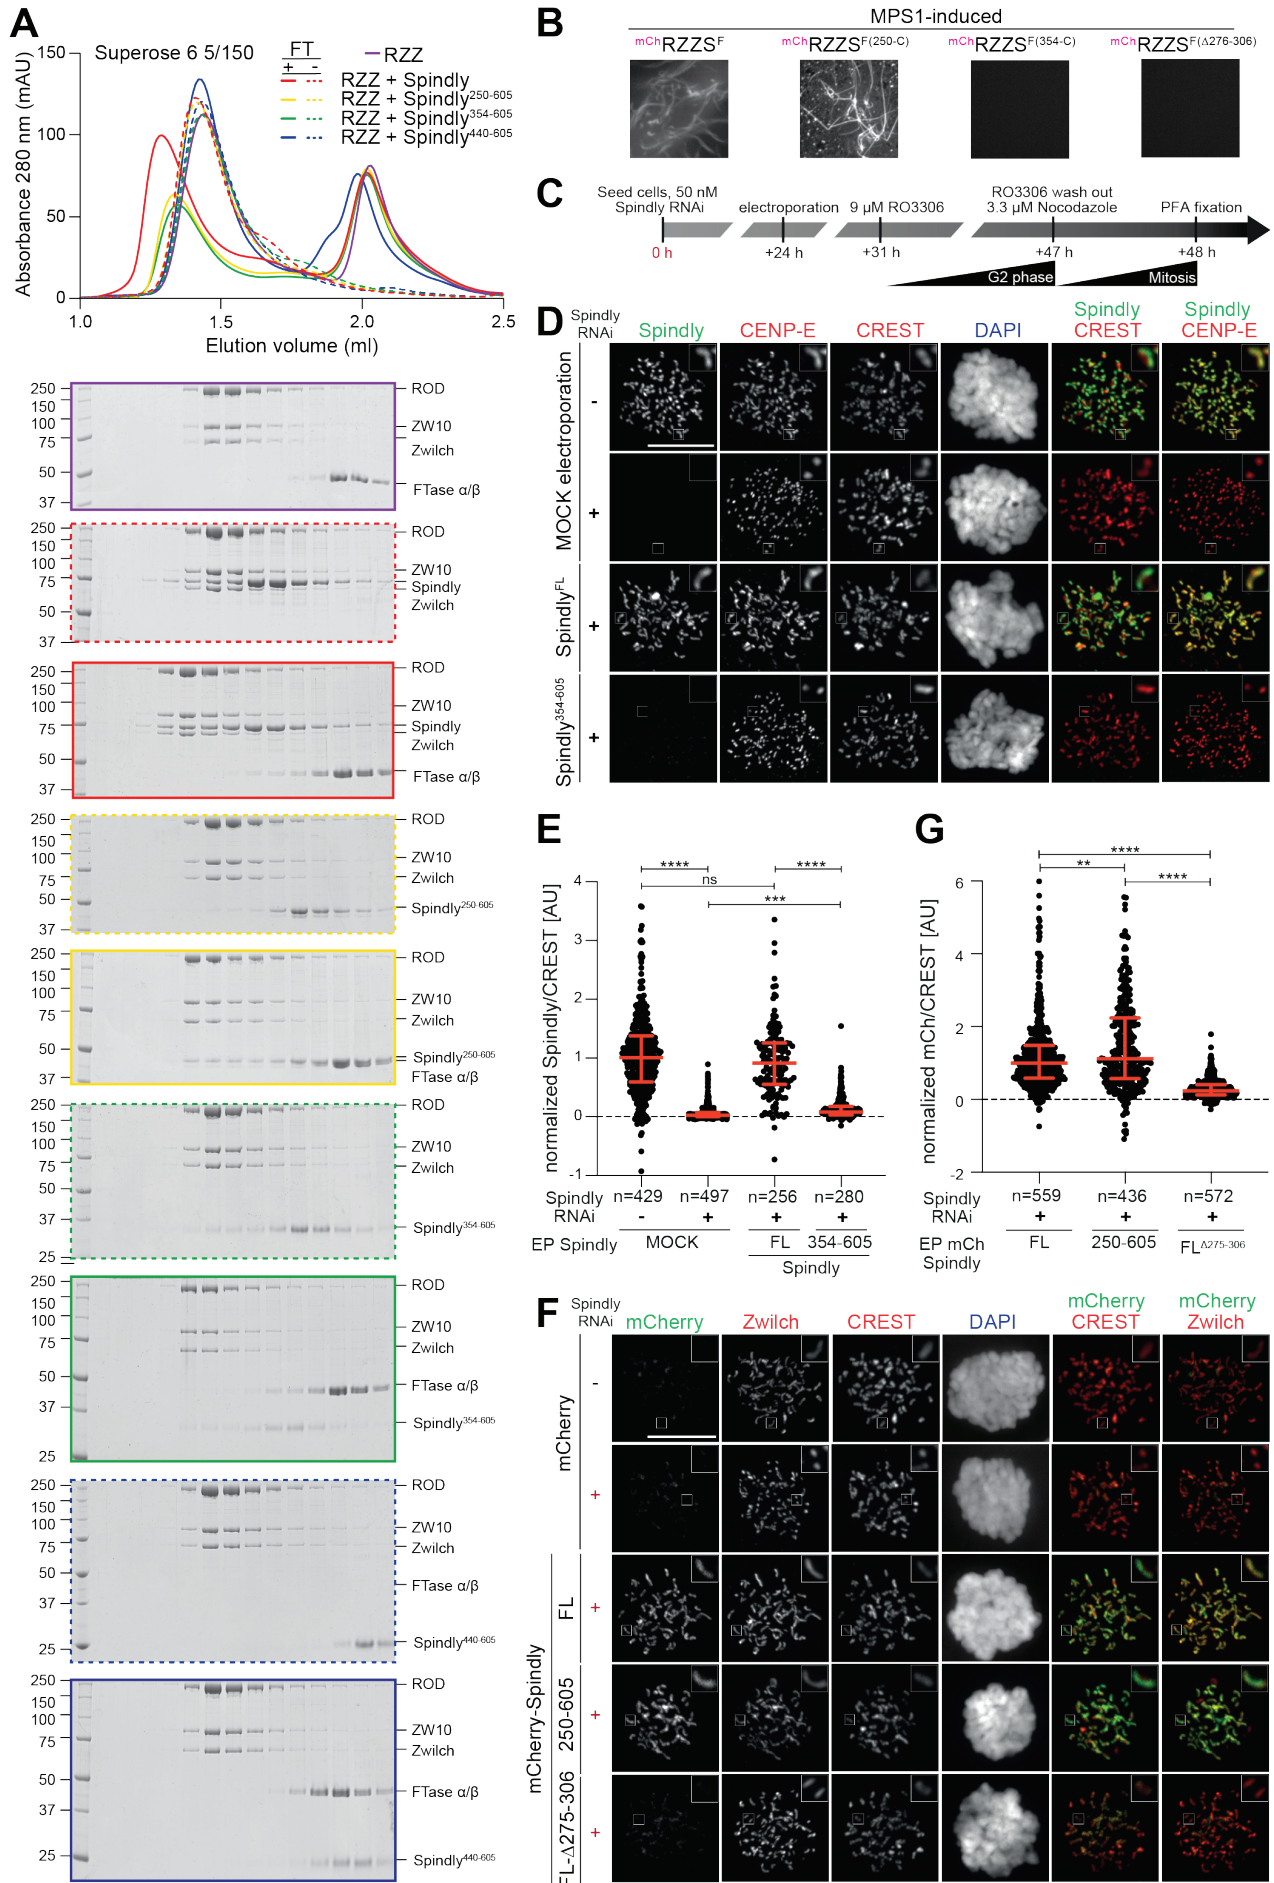

Figure 7



**Supplementary Table 1. Cryo-EM data collection, refinement and validation statistics**

|                                           |              |
|-------------------------------------------|--------------|
| <b>Data collection and processing</b>     |              |
| Magnification                             | 105,000      |
| Voltage (kV)                              | 300          |
| Electron exposure (e-/Å <sup>2</sup> )    | 59-60        |
| Defocus range (µm)                        | -1.2 to -2.7 |
| Pixel size (Å)                            | 0.9          |
| Symmetry imposed                          | C2           |
| Initial particle images (no.)             | 275,492      |
| Final particle images (no.)               | 191,979      |
| Map resolution (Å)                        | 3.9          |
| FSC threshold                             | 0.143        |
| Map resolution range (Å)                  | 3.7 - 8.0    |
|                                           |              |
| <b>Refinement</b>                         |              |
| Initial model used (PDB code)             |              |
| Model resolution (Å)                      |              |
| FSC threshold                             | 0.5          |
| Map sharpening B factor (Å <sup>2</sup> ) |              |
| Model composition                         |              |
| Non-hydrogen atoms                        |              |
| Protein residues                          |              |
| Ligands                                   |              |
| Water                                     |              |
| B factors (Å <sup>2</sup> )               |              |
| Protein                                   |              |
| Ligand                                    |              |

|                   |  |
|-------------------|--|
| Water             |  |
| R.m.s. deviations |  |
| Bond lengths (Å)  |  |
| Bond angles (°)   |  |
| Validation        |  |
| MolProbity score  |  |
| Clashscore        |  |
| Poor rotamers (%) |  |
| Ramachandran plot |  |
| Favored (%)       |  |
| Allowed (%)       |  |
| Disallowed (%)    |  |

## A Processing

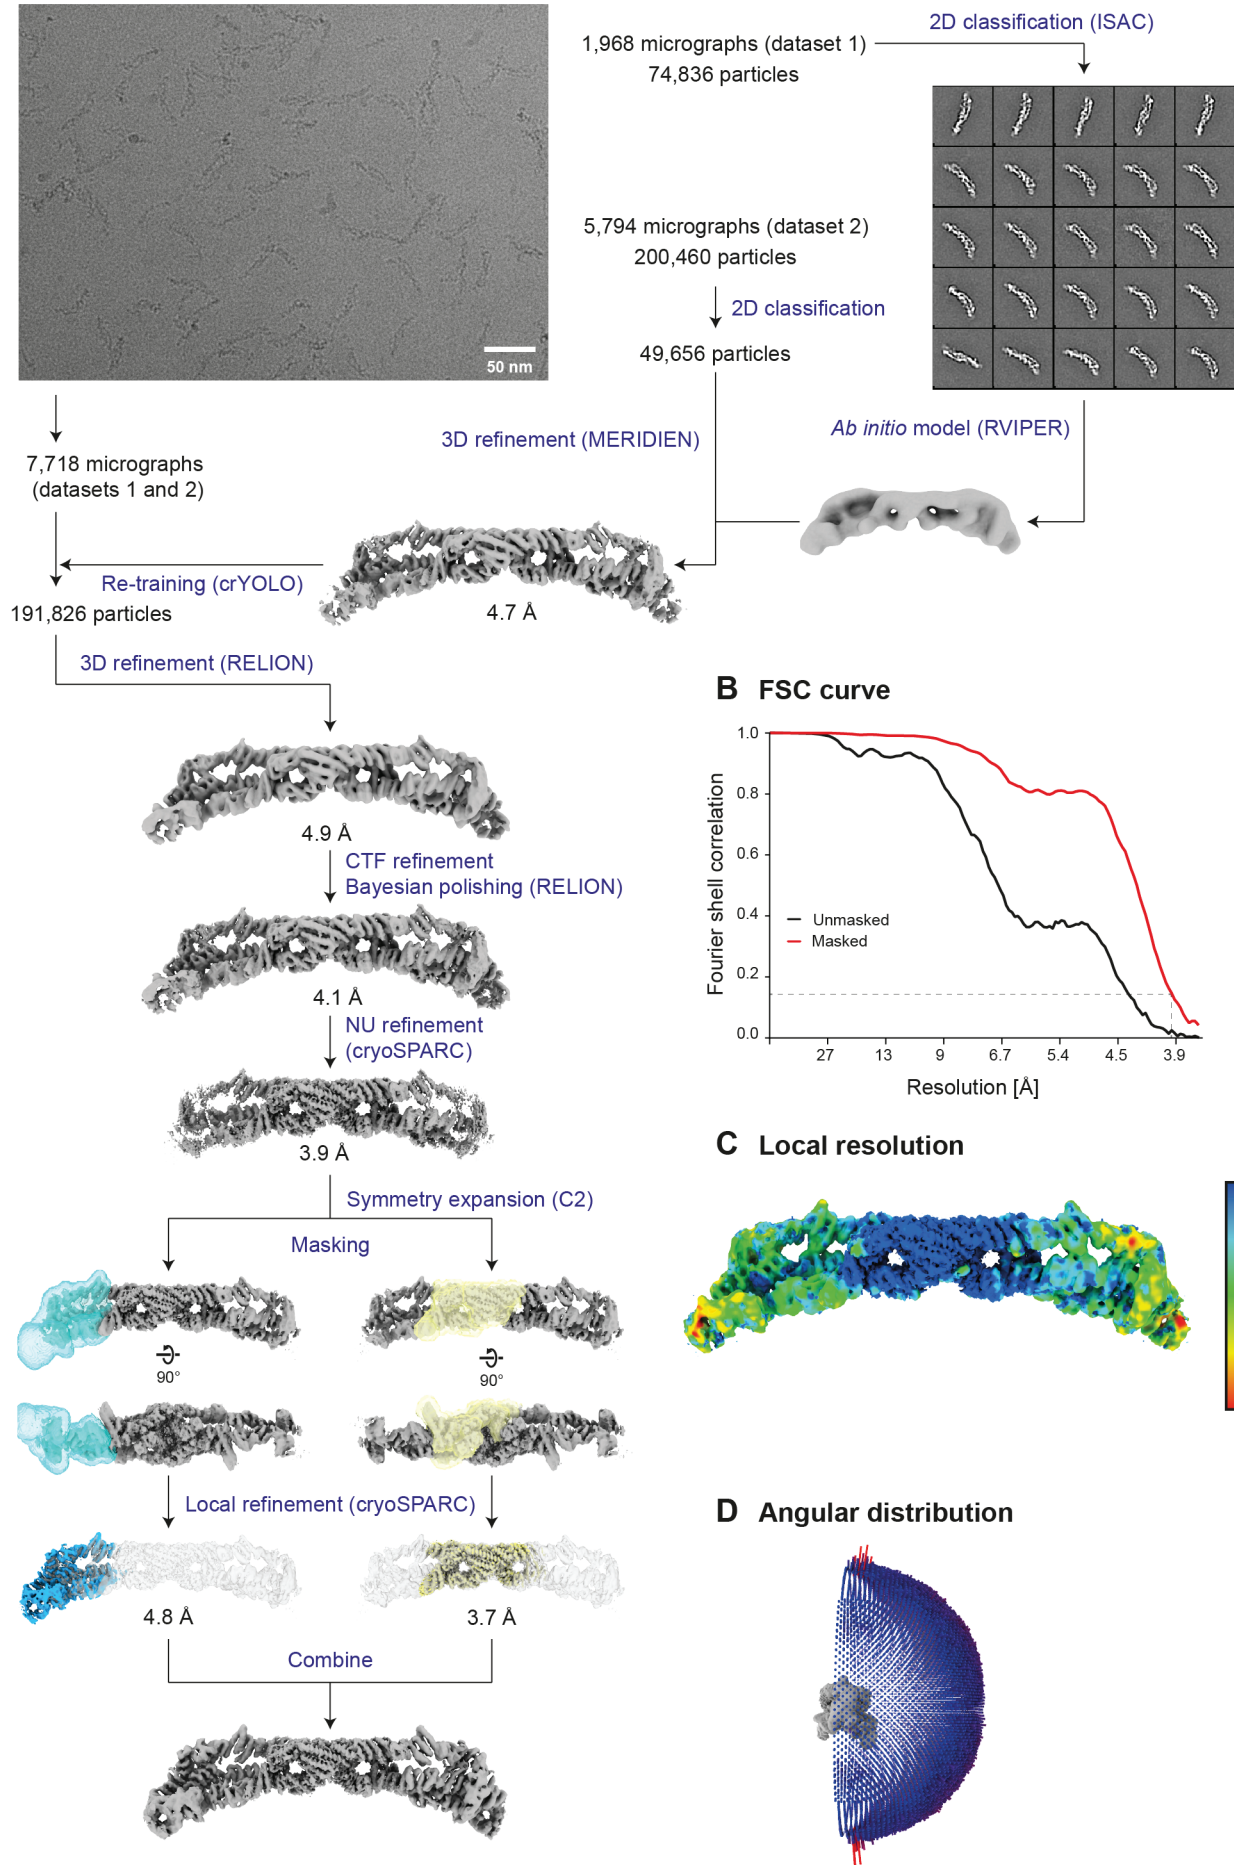

Figure 1 - Supplement 1

# Multiple sequence alignment of ROD

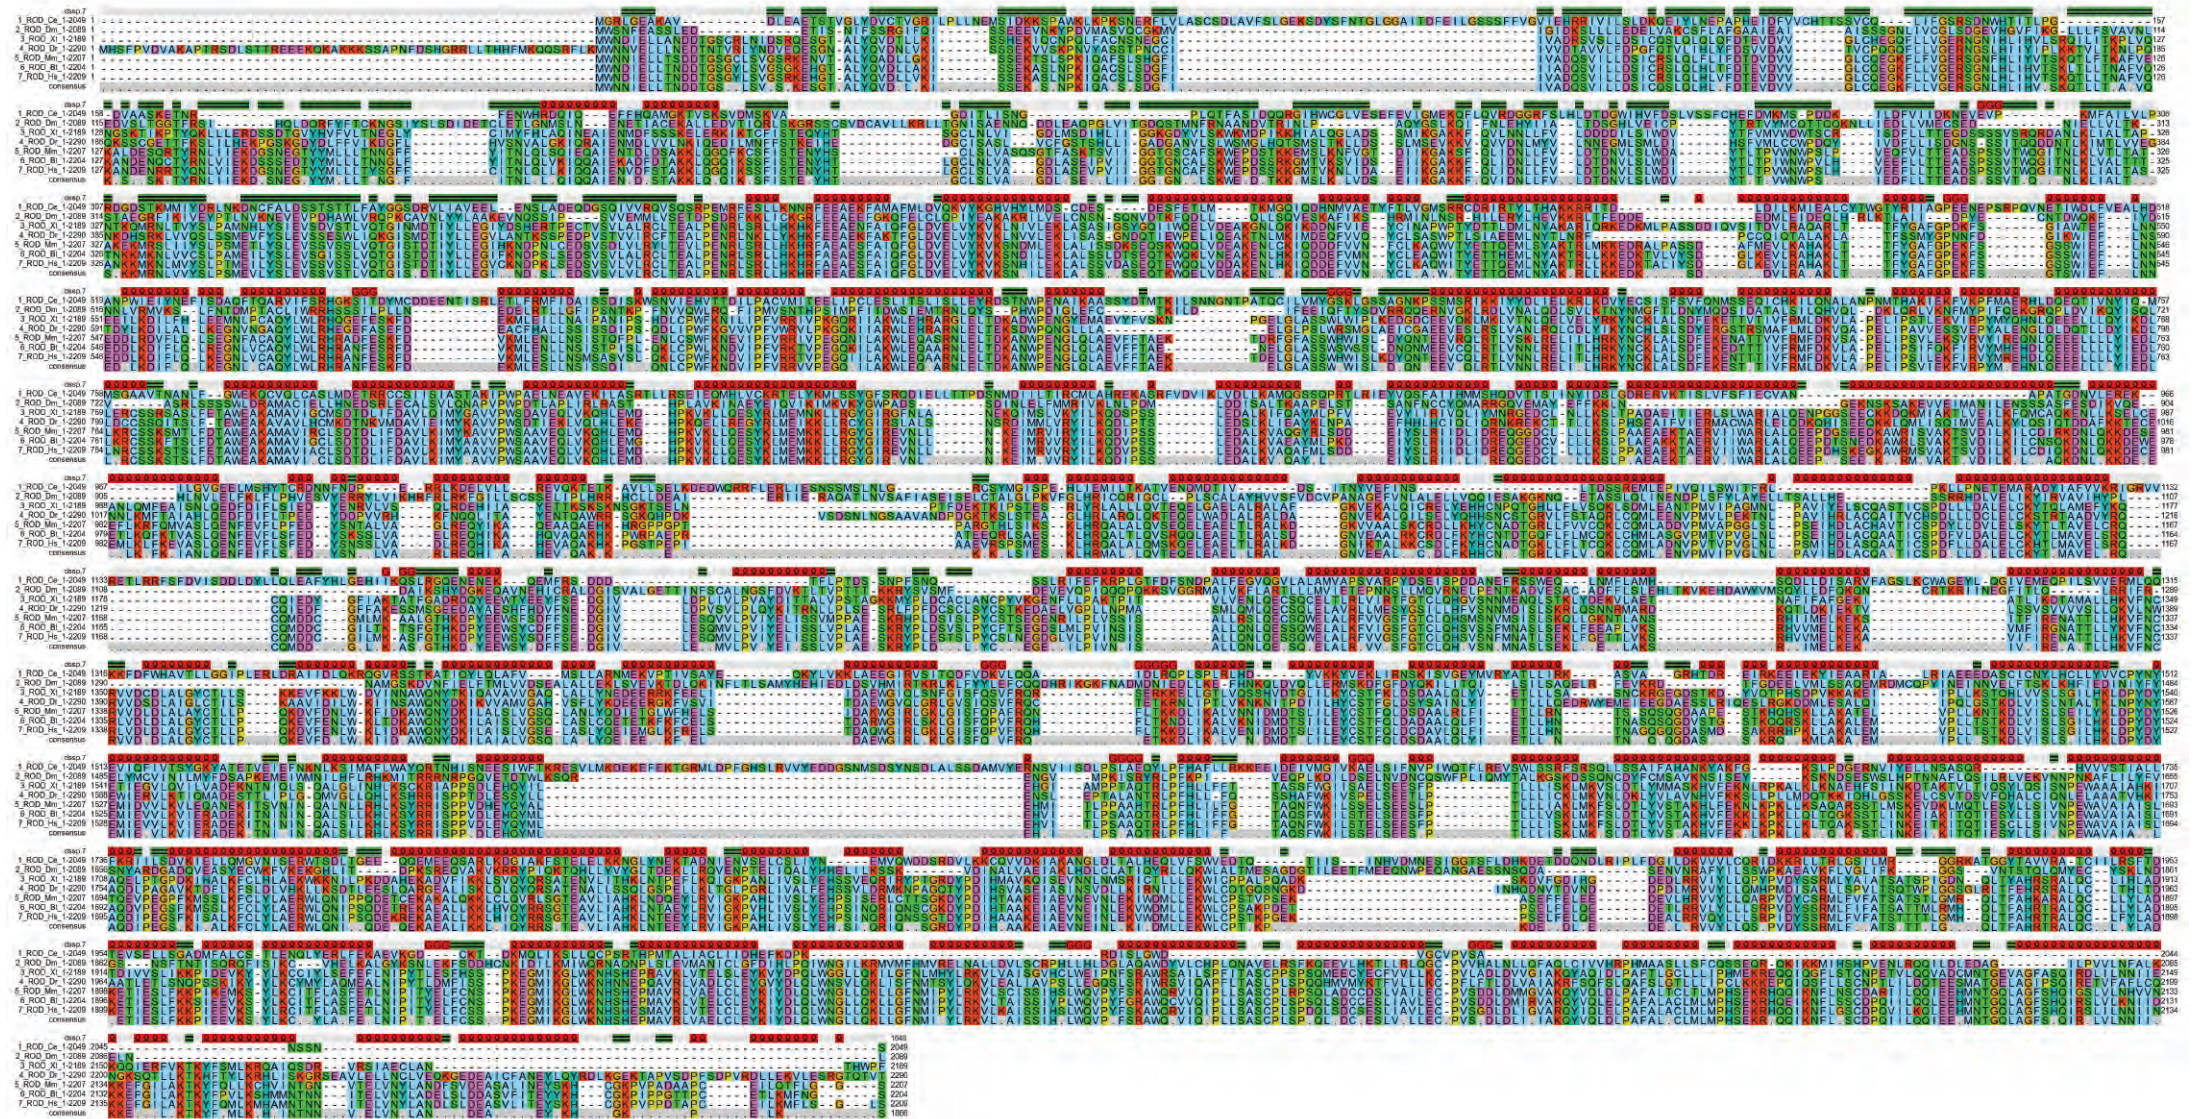

Figure 1 - Supplement 2

# Multiple sequence alignment of ZW10

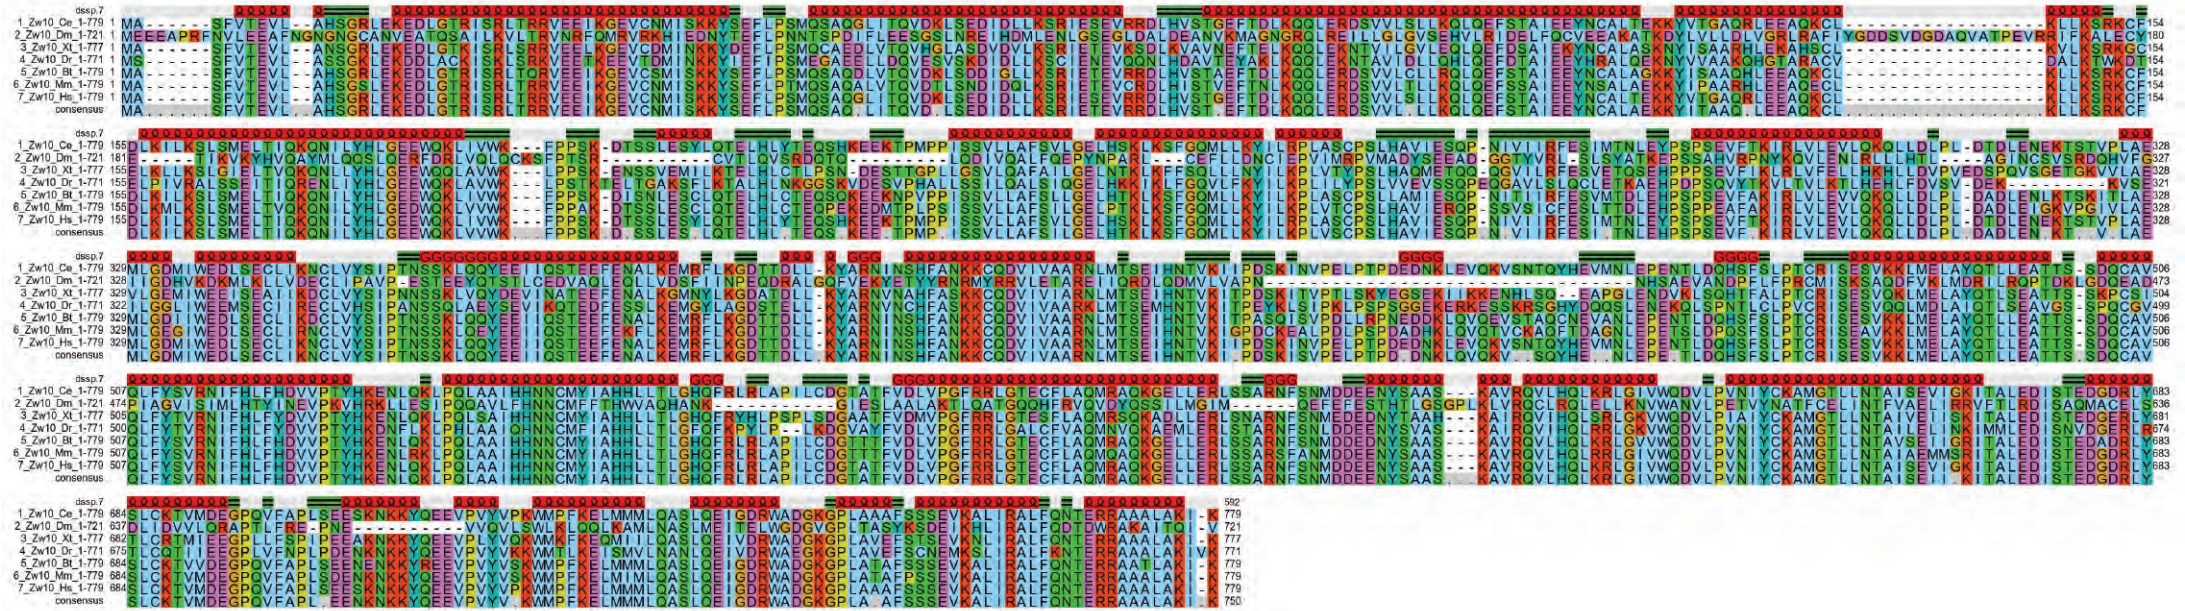

Figure 1 - Supplement 2

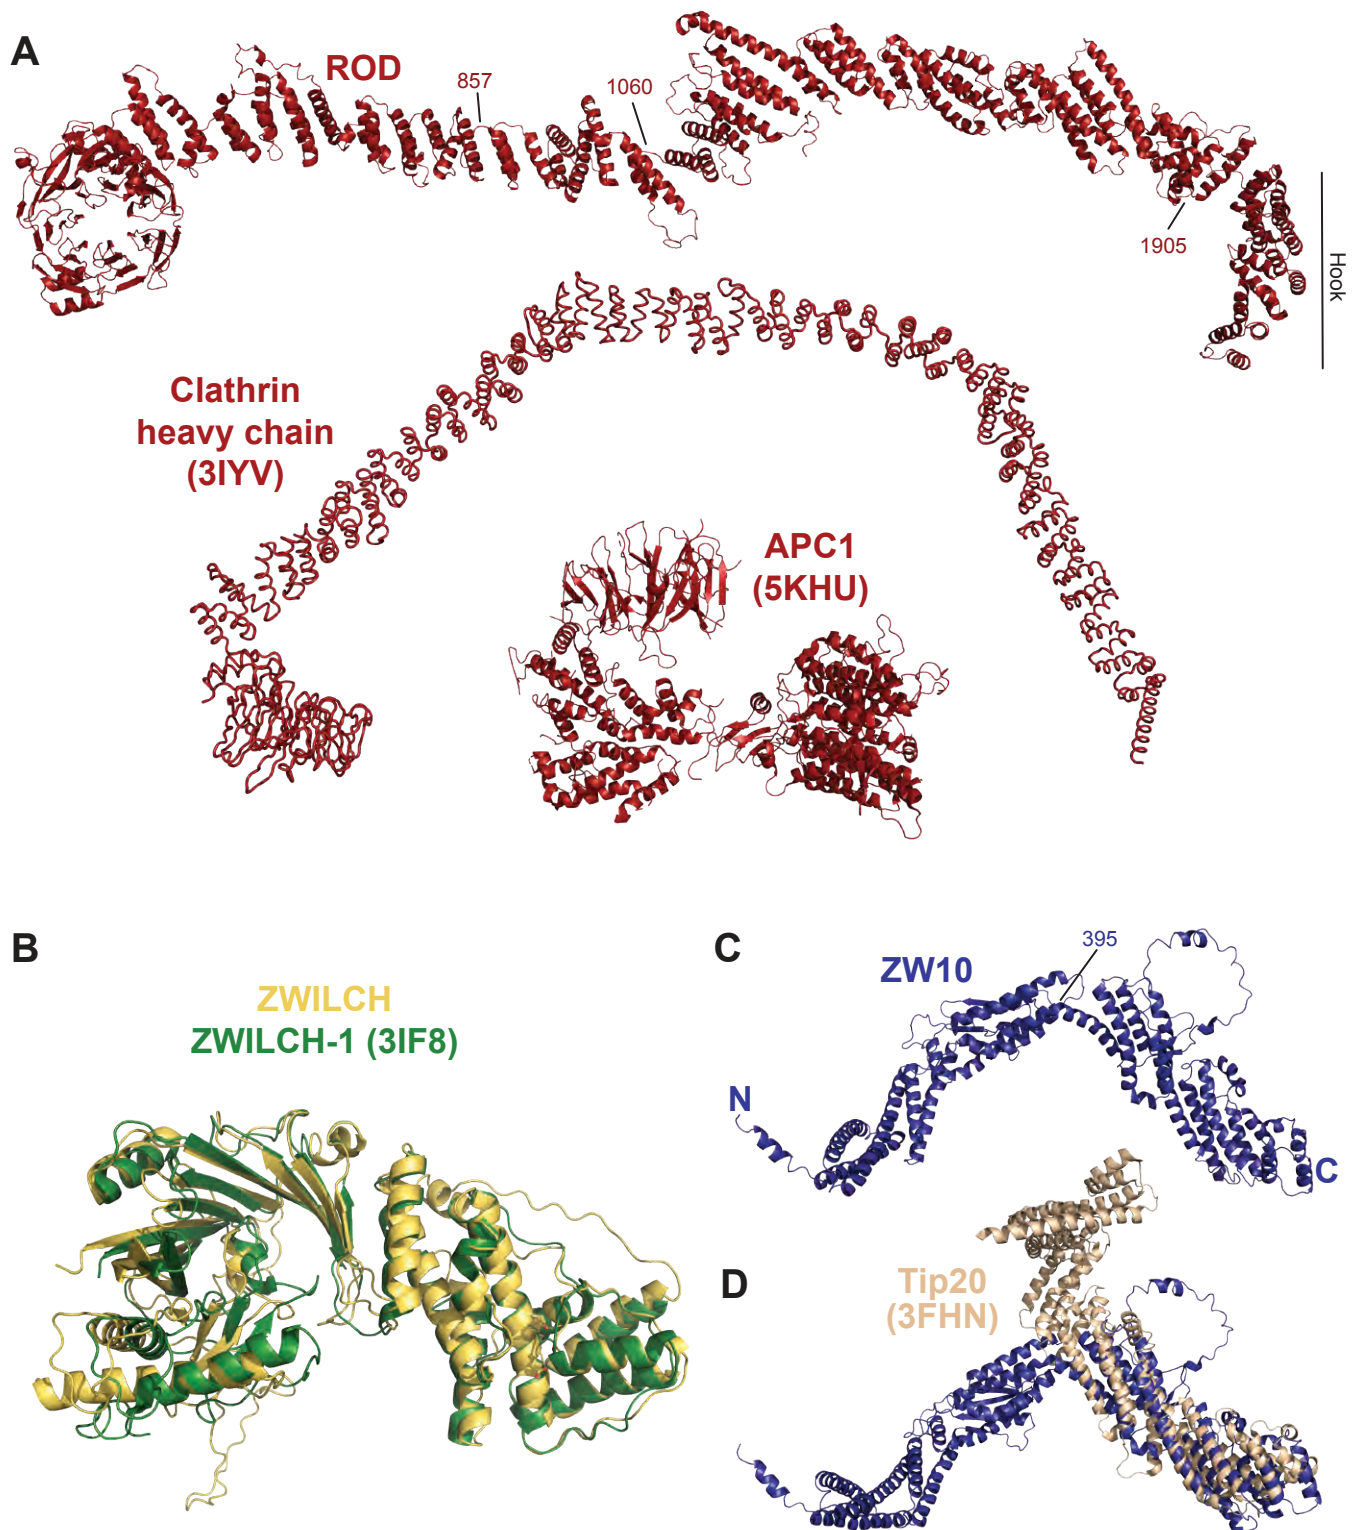

Figure 2 - Supplement 1

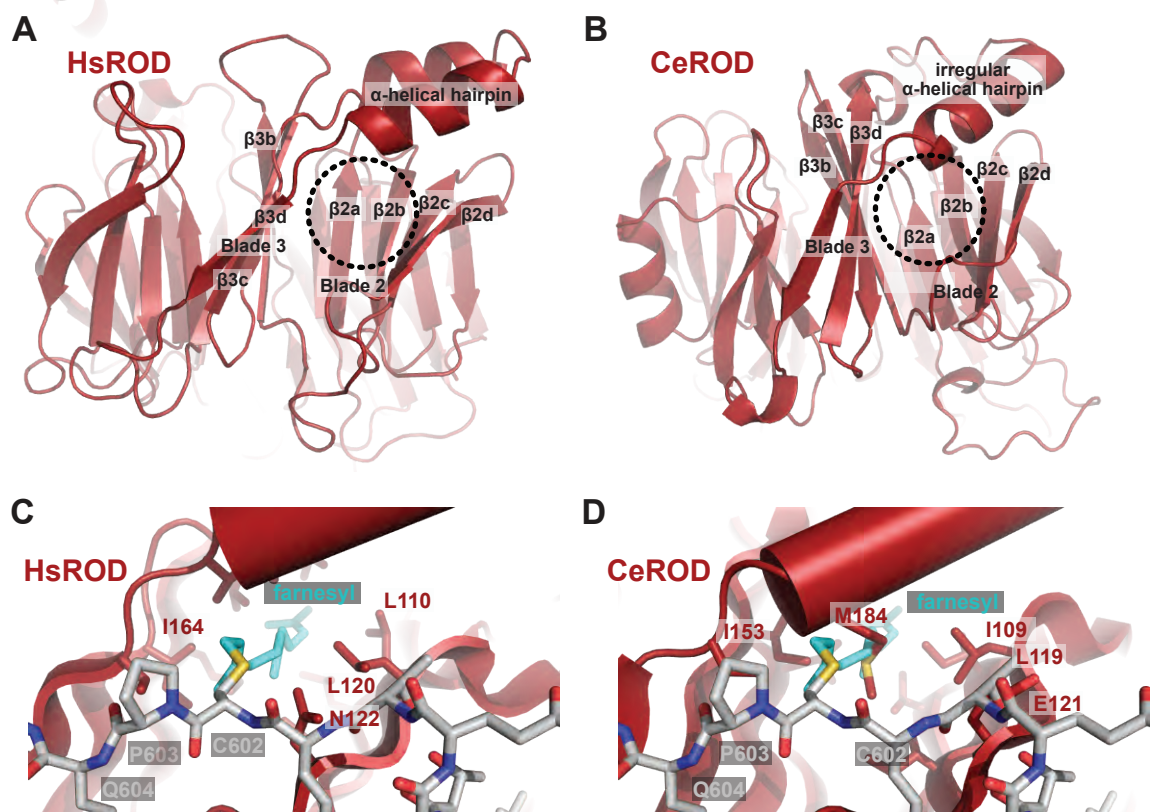

Figure 3 - Supplement 1

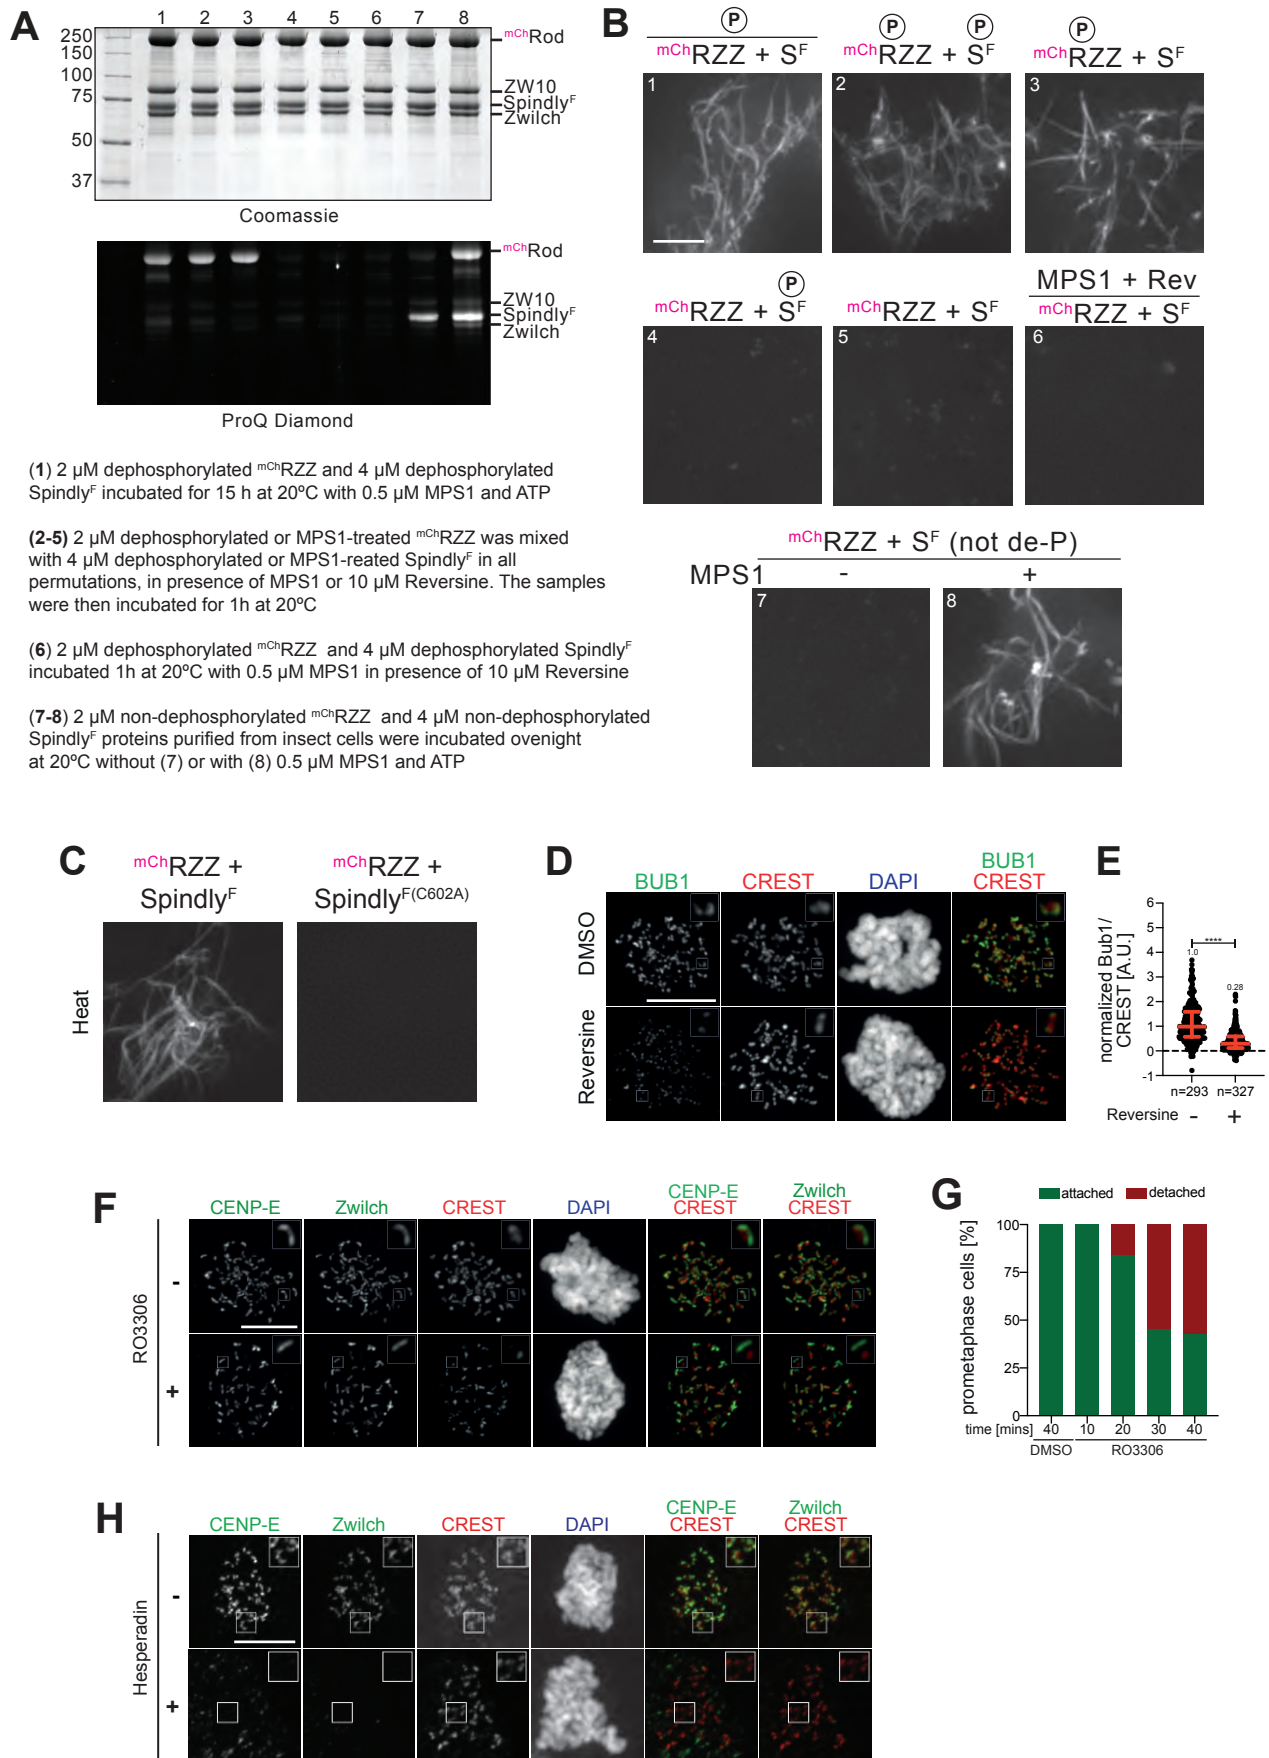

Figure 4 - Figure Supplement 1



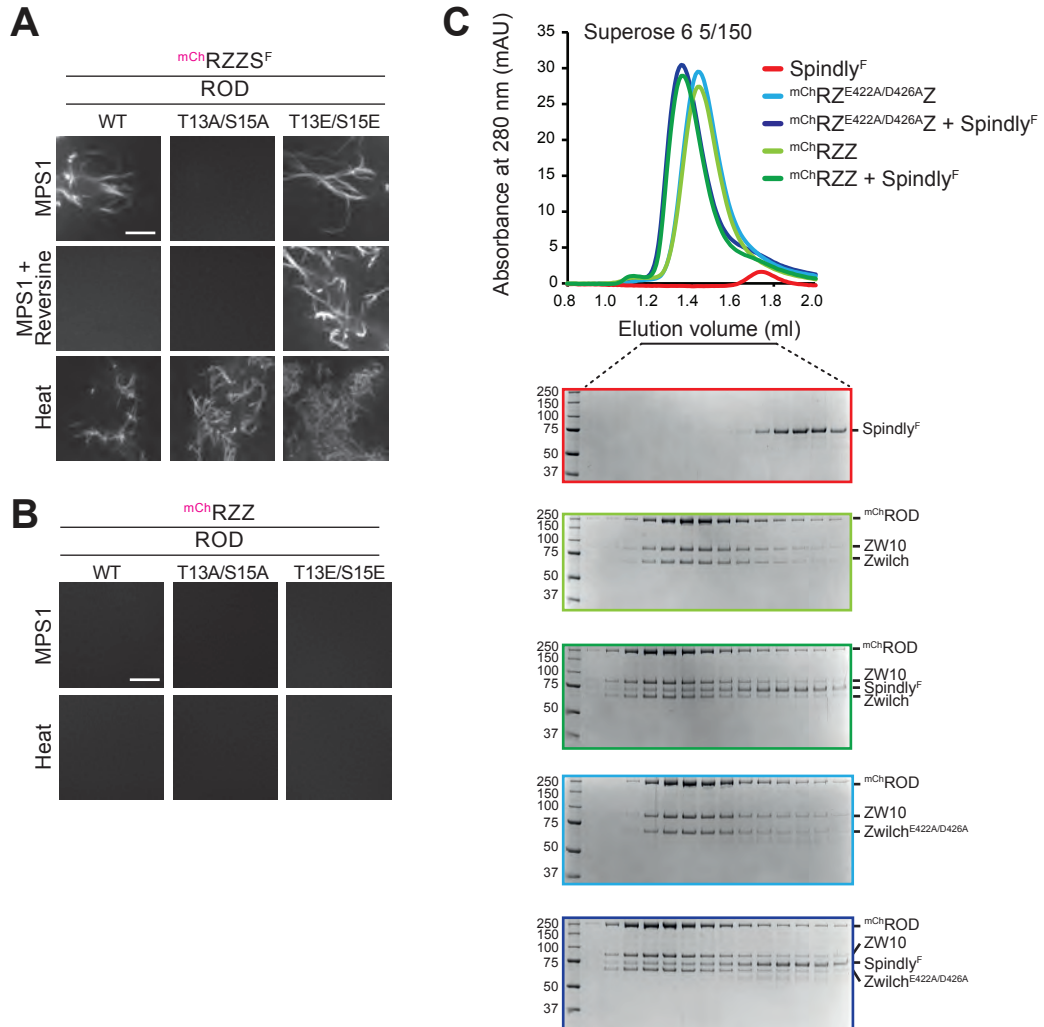

Figure 5 - Supplement 1

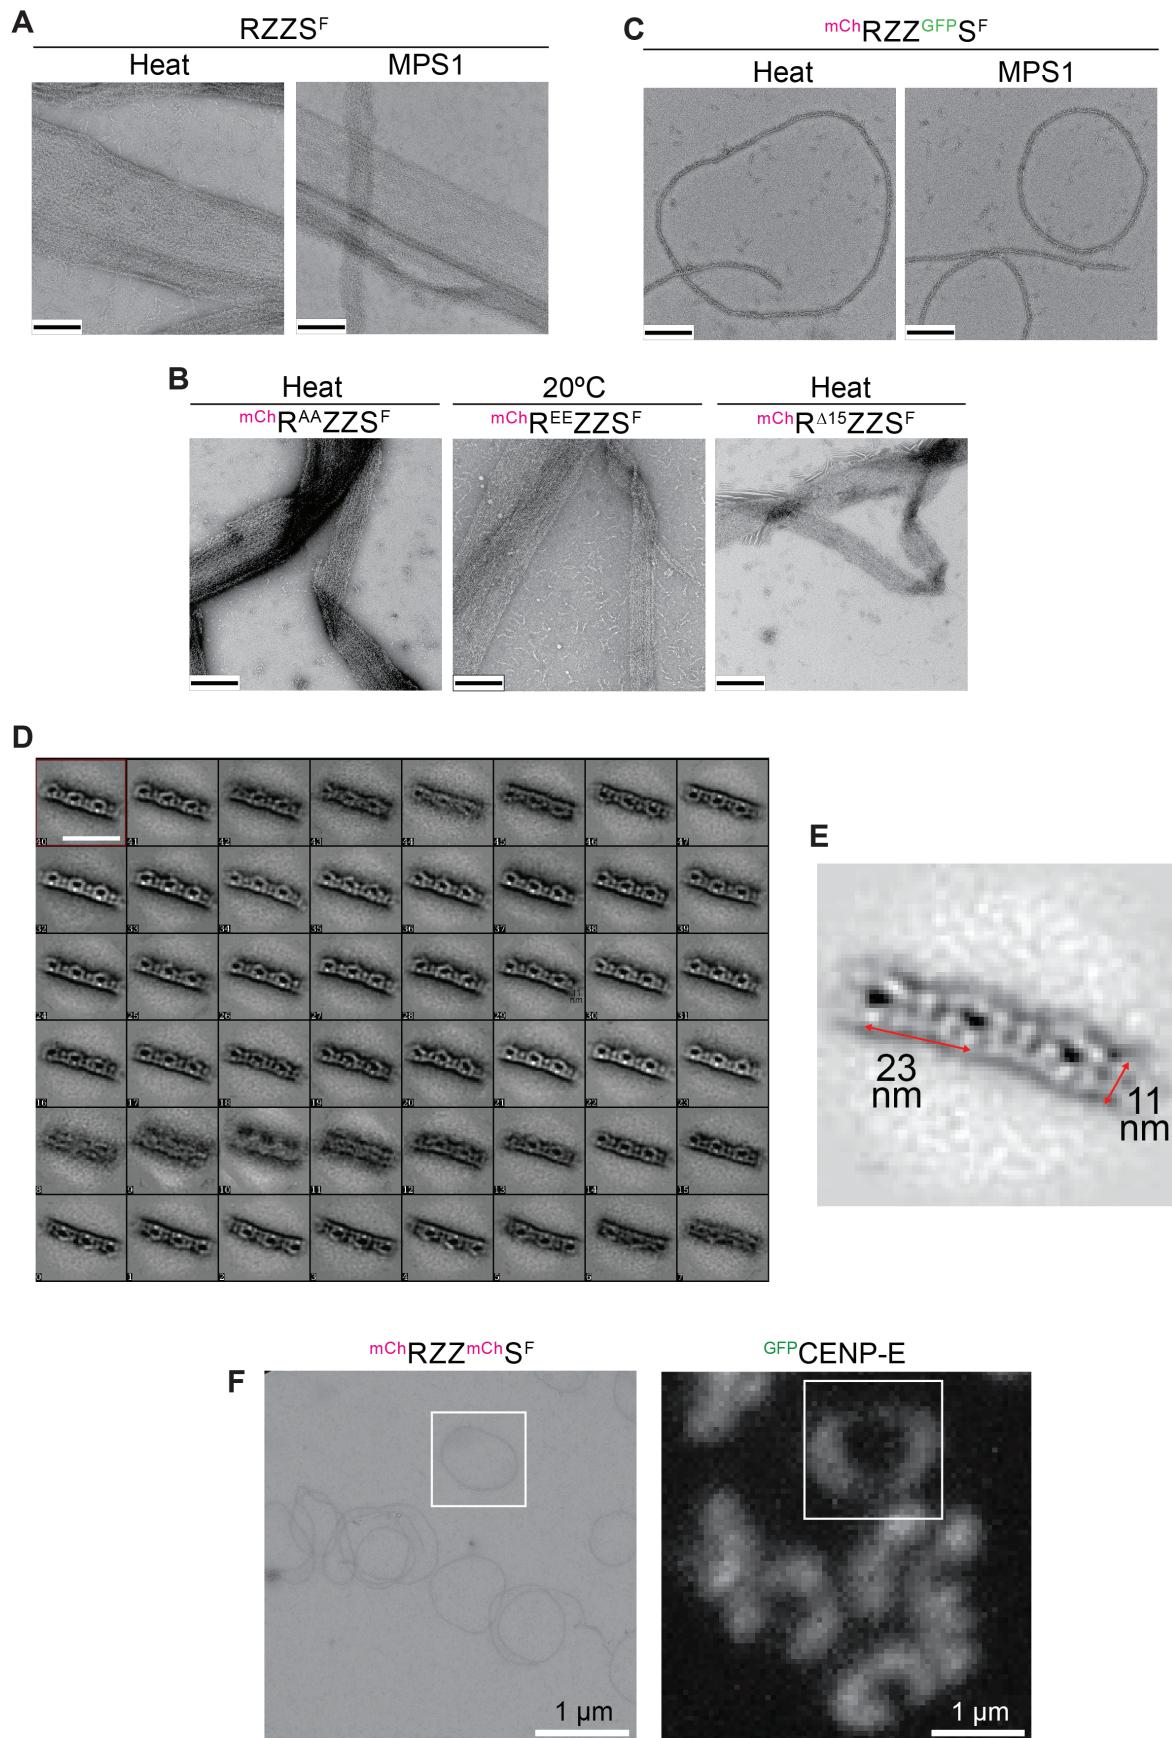

Figure 6 - Supplement 1

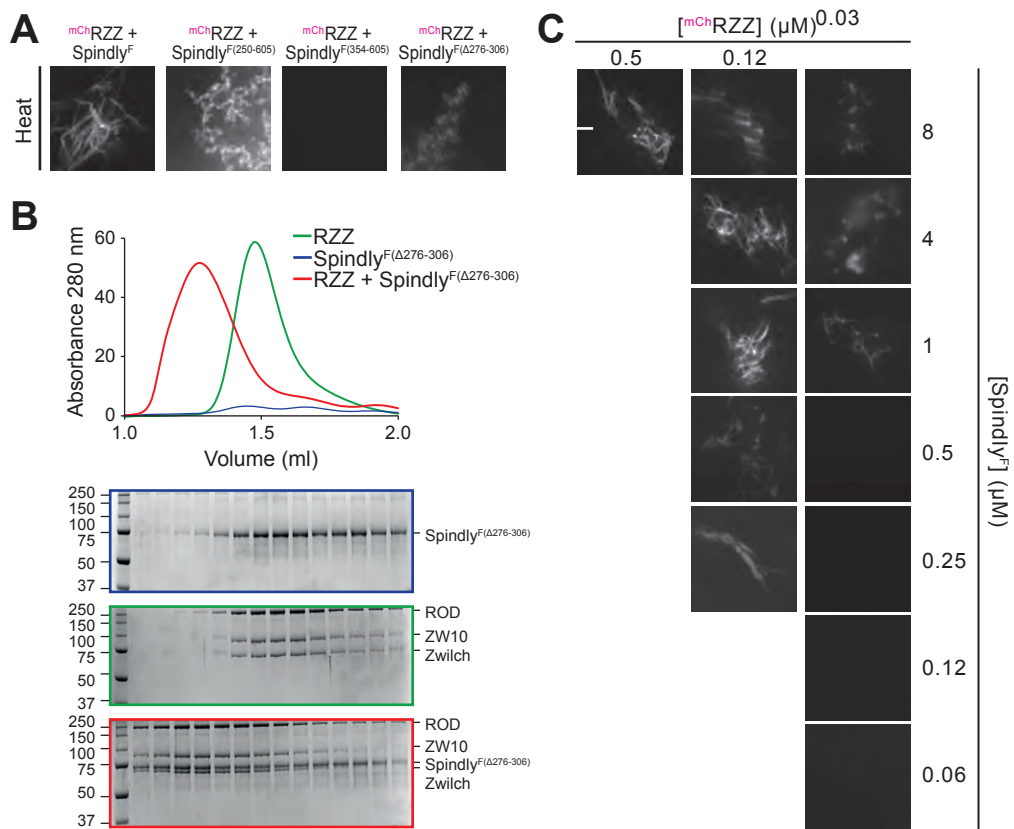

Figure 7 - Supplement 1
